1 Classification: Biological Sciences; Evolution  
2 Geography is more important than life history in the recent  
3 diversification of the tiger salamander complex

4  
5 Kathryn M. Everson<sup>a,1</sup>, Levi N. Gray<sup>a,1</sup>, Angela G. Jones<sup>a</sup>, Nicolette M. Lawrence<sup>a</sup>, Mary E.  
6 Foley<sup>a</sup>, Kelly L. Sovacool<sup>a,b</sup>, Justin D. Kratovil<sup>a,c</sup>, Scott Hotaling<sup>a,d</sup>, Paul M. Hime<sup>a,e</sup>, Andrew  
7 Storfer<sup>d</sup>, Gabriela Parra-Olea<sup>f</sup>, Ruth Percino-Daniel<sup>g</sup>, X. Aguilar-Miguel<sup>h</sup>, Eric M. O'Neill<sup>a</sup>, Luis  
8 Zambrano<sup>i</sup>, H. Bradley Shaffer<sup>j</sup>, David W. Weisrock<sup>a,2</sup>

9  
10 <sup>a</sup>Department of Biology, University of Kentucky, Lexington, KY 40506 USA

11 <sup>b</sup>Department of Computational Medicine & Bioinformatics, University of Michigan, Ann Arbor,  
12 MI 48109 USA

13 <sup>c</sup>Ecology and Evolutionary Biology Department, University of Connecticut, Storrs, CT 06269  
14 USA

15 <sup>d</sup>School of Biological Sciences, Washington State University, Pullman, WA 99164 USA

16 <sup>e</sup>Biodiversity Institute, University of Kansas, Lawrence, KS 66045 USA

17 <sup>f</sup>Departamento de Zoología, Instituto de Biología, Universidad Nacional Autónoma de México,  
18 Ciudad Universitaria, Coyoacán, Ciudad de México 04510, México

19 <sup>g</sup>Departamento de Ecología Evolutiva, Instituto de Ecología, Universidad Nacional Autónoma  
20 de México, Ciudad Universitaria, Coyoacán, Ciudad de México 04510, México

21 <sup>h</sup>CIRB, Facultad de Ciencias, Universidad Autónoma del Estado de México, Toluca 50000, Edo.  
22 de México, México

23 <sup>i</sup> Facultad de Medicina Veterinaria y Zootecnia, Universidad Autónoma de Sinaloa, Culiacán

24 Rosales 82260, Sinaloa, Mexico

25 <sup>j</sup> Department of Ecology and Evolutionary Biology, and La Kretz Center for California

26 Conservation Science, University of California, Los Angeles, CA 90095 USA

27

28 <sup>1</sup> K.M.E. and L.N.G. contributed equally to this work

29 <sup>2</sup> To whom correspondence may be addressed. Email: [david.weisrock@uky.edu](mailto:david.weisrock@uky.edu)

30 **ABSTRACT**

31           The North American tiger salamander species complex, including its flagship species the  
32 axolotl, has long been a source of biological fascination. The complex exhibits a wide range of  
33 variation in developmental life history strategies, including populations and individuals that  
34 undergo metamorphosis and those able to forego metamorphosis and retain a larval, aquatic  
35 lifestyle (i.e., paedomorphosis). Such disparate life history strategies are assumed to cause  
36 populations to become reproductively isolated, but the degree to which they have actually shaped  
37 population- and species-level boundaries is poorly understood. Using a large multi-locus dataset  
38 from hundreds of samples across North America, we identified genetic clusters with clear signs  
39 of admixture across the geographic range of the tiger salamander complex. Population clusters  
40 often contain a mixture of paedomorphic and metamorphic taxa, and we conclude that geography  
41 has played a large role in driving lineage divergence relative to obligate paedomorphosis in this  
42 system. This conclusion is bolstered by model-based analyses demonstrating gene flow between  
43 metamorphic and paedomorphic populations. Even the axolotl, a paedomorphic species with an  
44 isolated native range, apparently has a history of gene flow with its neighboring populations.  
45 This fine-scale genetic perspective on life-history variation establishes a framework for  
46 understanding how plasticity, local adaptation, and gene flow contribute to lineage divergence.  
47 The axolotl is currently used as the vertebrate model system in regenerative biology, and our  
48 findings chart a course for more informed use of these and other tiger salamander species in  
49 experimental and field research, including conservation priorities.

50

51 **Keywords:** *Ambystoma*, life history, phylogenetics, population genomics, salamanders

52 **SIGNIFICANCE STATEMENT**

53           Population structure and speciation are shaped by a variety of biotic and abiotic factors.  
54 In the tiger salamander complex, one factor that may influence diversification is life history:  
55 some taxa are obligately paedomorphic—a condition where adults maintain an aquatic, larval  
56 phenotype—while others are facultatively paedomorphic or entirely metamorphic. Using a large  
57 multi-locus dataset, we found evidence of gene flow and/or panmixia between obligately and  
58 facultatively paedomorphic taxa, suggesting that an obligately paedomorphic life history is not a  
59 strong driver of speciation in the tiger salamander complex. We also recovered a history of gene  
60 flow between the critically endangered axolotl and its neighboring populations, providing  
61 important information for its conservation and captive management.

62

63

## 64 INTRODUCTION

65 Life history—the complement of traits affecting survival and reproduction over an  
66 organism’s lifetime—affects ecology and dispersal, and therefore plays a major role in shaping  
67 population structure and speciation (1, 2). The axolotl (*Ambystoma mexicanum*) and related  
68 salamander species of the North American *Ambystoma tigrinum* complex (Table 1) display  
69 enormous variation in life history (3). Some members of this group are considered obligate  
70 paedomorphs, where sexually mature adults retain a larval, aquatic body plan that includes  
71 external gills and an enlarged tail fin (4). Others are considered obligate metamorphs,  
72 transforming from aquatic larvae to terrestrial adults. Most populations are facultative in their  
73 developmental life history strategy, transforming under certain genetic and/or environmental  
74 conditions (5–8). This lability in life history is believed to have played an important role in the  
75 diversification of the *A. tigrinum* complex, particularly in the Trans-Mexican Volcanic Belt  
76 (TMVB) region, where several essentially paedomorphic species (including the axolotl) have  
77 been described (9–11). Obligate paedomorphosis is estimated to have evolved in this region  
78 multiple times (11–13) in association with relatively large, permanent bodies of water.  
79 Presumably, restricted gene flow between these isolated, paedomorphic populations led to  
80 speciation as well as morphological adaptations to the aquatic lifestyle (14).

81 The term “species complex,” while not a formal taxonomic category, is often used to  
82 describe groups of closely related lineages early in the divergence process. The tiger salamander  
83 species complex has been highlighted as a potentially valuable example of a recent radiation (15)  
84 that could provide insight into the early mechanisms initiating and/or maintaining diversity (16–  
85 21). However, such species complexes poses a number of challenges: phenotypic differences  
86 among lineages may be subtle or absent (i.e., cryptic species), ancestral polymorphisms may be

**Table 1.** Currently recognized species in the *Ambystoma tigrinum* complex. Life histories, habitat preferences, and conservation status were compiled from AmphibiaWeb (2019) and the IUCN (2019).

| Species                         | Description Reference   | Life History                    | Habitat Preference                | Conservation Status   |
|---------------------------------|-------------------------|---------------------------------|-----------------------------------|-----------------------|
| <i>Ambystoma altamirani</i>     | Dugès, 1895             | Facultative paedomorph          | Streams, occasional ponds         | Endangered            |
| <i>Ambystoma amblycephalum</i>  | Taylor, 1940            | Facultative paedomorph          | Ponds                             | Critically endangered |
| <i>Ambystoma andersoni</i>      | Krebs & Brandon, 1984   | Paedomorph                      | Lake Zacapu                       | Critically endangered |
| <i>Ambystoma bombypellum</i>    | Taylor, 1940            | Facultative paedomorph          | Lakes / Ponds, occasional streams | Data deficient        |
| <i>Ambystoma californiense</i>  | Gray 1853               | Metamorph                       | Vernal pools                      | Vulnerable            |
| <i>Ambystoma dumerilii</i>      | (Dugès, 1870)           | Paedomorph                      | Lake Patzcuaro                    | Critically endangered |
| <i>Ambystoma flavipiperatum</i> | Dixon, 1963             | Facultative paedomorph          | Lakes / Ponds, occasional streams | Endangered            |
| <i>Ambystoma granulorum</i>     | Taylor, 1944            | Facultative paedomorph          | Lakes / Ponds, occasional streams | Critically endangered |
| <i>Ambystoma leorae</i>         | (Taylor, 1943)          | Facultative paedomorph          | Streams                           | Critically endangered |
| <i>Ambystoma lermaense</i>      | (Taylor, 1940)          | Facultative; often paedomorphic | Lakes / Ponds                     | Endangered            |
| <i>Ambystoma mavortium</i> *    | Baird, 1850             | Facultative paedomorph          | Lakes / Ponds                     | Least concern         |
| <i>Ambystoma mexicanum</i>      | (Shaw and Nodder, 1798) | Paedomorph                      | Lakes Xochimilco & Chalco         | Critically endangered |
| <i>Ambystoma ordinarium</i>     | Taylor, 1940            | Facultative paedomorph          | Streams, ponds                    | Endangered            |
| <i>Ambystoma rivulare</i>       | (Taylor, 1940)          | Facultative paedomorph          | Streams                           | Endangered            |
| <i>Ambystoma rosaceum</i>       | Taylor, 1941            | Facultative paedomorph          | Streams, occasional ponds         | Least concern         |
| <i>Ambystoma silvense</i>       | Webb, 2004              | Facultative paedomorph          | Lakes / Ponds                     | Data deficient        |
| <i>Ambystoma taylori</i>        | Brandon et al., 1982    | Paedomorph                      | Lake Alchichica (saline)          | Critically endangered |
| <i>Ambystoma tigrinum</i>       | Green, 1825             | Rare paedomorph                 | Lakes / Ponds                     | Least concern         |
| <i>Ambystoma velasci</i>        | (Dugès, 1888)           | Facultative paedomorph          | Lakes / Ponds, Streams            | Least concern         |

\*includes 5 recognized subspecies: *A. m. mavortium* Baird 1850, *A. m. melanostictum* (Cooper 1859), *A. m. diaboli* Dunn 1940, *A. m. nebulosum* Hallowell 1853, and *A. m. stebbinsi* Lowe 1954

87 stochastically inherited (i.e., incomplete lineage sorting), and reproductive barriers may be  
88 porous (i.e., speciation with gene flow). Furthermore, phenotypic variation may not reflect  
89 lineage divergence or speciation processes; for example, trait variation may be the result of  
90 plasticity or balancing selection (22). The reliance on phenotype for species diagnosis in the *A.*  
91 *tigrinum* complex may require particular scrutiny, as several phenotypic traits, including  
92 developmental state and adult color pattern, can be plastic and highly variable (23–25). Given  
93 these challenges, fundamental questions remain concerning the evolutionary distinctiveness of  
94 component lineages within the tiger salamander complex, calling into question the current  
95 taxonomy as an accurate reflection of the underlying population biology.

96       Previous research has produced mixed results regarding levels of genetic differentiation  
97 among lineages in the *A. tigrinum* complex, as well as the relative importance of paedomorphosis  
98 as a driver of diversification. While population- and species-level structure is evident, an  
99 important theme emerging across multiple studies has been that reproductive barriers are porous  
100 or incomplete (11, 26, 27). Indeed, Shaffer and McKnight (11) noted “the striking lack of  
101 differentiation among the 14 species of the tiger salamander complex” (p. 425). Some studies  
102 have found an elevated degree of population structure among paedomorphic populations relative  
103 to metamorphic populations (12, 28), but others have demonstrated that paedomorphic taxa and  
104 neighboring metamorphic populations are not fully reproductively isolated (29) and can produce  
105 viable hybrid offspring under laboratory conditions (30, 31). Furthermore, there is evidence that  
106 some populations considered to be obligately paedomorphic are capable of transforming at low  
107 rates and may be more appropriately considered facultatively paedomorphic (10, 32, 33),  
108 although the absence of transformed individuals in nature is difficult to verify without targeted  
109 ecological studies (34).

110 To illuminate the processes underlying diversification in the tiger salamander complex,  
111 an important first step must be a range-wide assessment of population structure and the  
112 clarification of population- and species-level boundaries. With this groundwork, insights into the  
113 role of paedomorphosis and diversification can be addressed. For a study system of this  
114 geographic and taxonomic scale, robust inference of population structure requires information  
115 derived from throughout the genome combined with thorough range-wide sampling. To meet  
116 these criteria, we expand on a large multi-locus dataset containing 95 nuclear loci for 93  
117 individuals (35), to produce a data matrix for 347 individuals across the full geographic range of  
118 tiger salamanders (Fig. S1). Given the complex and somewhat checkered history of the group's  
119 taxonomy, we take a naïve approach, performing population structure analyses without *a priori*  
120 identification of taxa to resolve geographic genetic clusters and characterize patterns of  
121 admixture. We couple these results with phylogenetic network analyses and model-based tests of  
122 migration between metamorphic and paedomorphic populations to provide an additional  
123 perspective on the degree to which populations are genetically connected, now or in the recent  
124 past. We then infer a species tree for identified genetic clusters in an attempt to provide an  
125 updated working hypothesis for the evolution of the group. Finally, we test the overarching  
126 hypothesis that life history evolution has driven speciation in the tiger salamander complex,  
127 particularly through the assumed isolation and independence of small-range endemics classified  
128 as paedomorphic species.

129



130 **RESULTS AND DISCUSSION**

131 *Identification of genetic lineages and gene flow*

132 A principal components analysis (PCA) and a discriminant analysis of principal  
133 components (DAPC; 36) both recovered *Ambystoma californiense*, the only confirmed obligate  
134 metamorph in the complex, as genetically distinct from all other tiger salamanders (Fig. 1A, S2,  
135 S3), which is consistent with previous work (e.g., 11, 37). After removing *A. californiense* from  
136 the dataset, DAPC analysis supported the recognition of three primary genetic clusters: U.S.  
137 (including samples from southern Canada), northwestern Mexico, and central Mexico (Fig. 1B,  
138 S4). All populations in the U.S. and northern Mexico clusters are considered facultatively  
139 paedomorphic or primarily metamorphic (38). The central Mexico cluster, however, contains a  
140 wealth of life history extremes: four currently recognized species are considered to be obligate  
141 paedomorphs and ten others are facultatively paedomorphic to varying degrees (13, 39). A PCA  
142 of these data produced similar clustering results, with ordination patterns largely mirroring  
143 geographic sampling (Fig. S5). For discussion of the taxonomic implications of our results, see  
144 the Supplementary Material.

145 Within central Mexico, both DAPC and STRUCTURE analyses identified four  
146 geographic clusters (hereafter referred to as CM1-CM4) with signatures of admixture within and  
147 among them (Figs. 2A, S6-S8). Network analysis (40) also recovered groups that generally  
148 correspond to CM1-CM4, but with a large number of reticulate branches (Fig. 3). This starburst-  
149 like pattern indicates the presence of conflicting topologies within the dataset (40), which can be  
150 caused by biological processes including incomplete lineage sorting (a historical legacy of recent  
151 diversification) and gene flow, either current or in the evolutionarily recent past. Phylogenetic

**A) DAPC of full dataset**

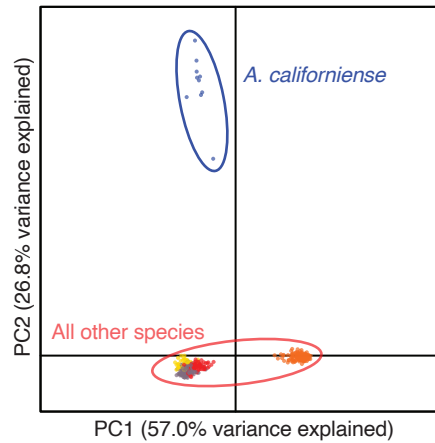

**B) DAPC without *A. californiense***

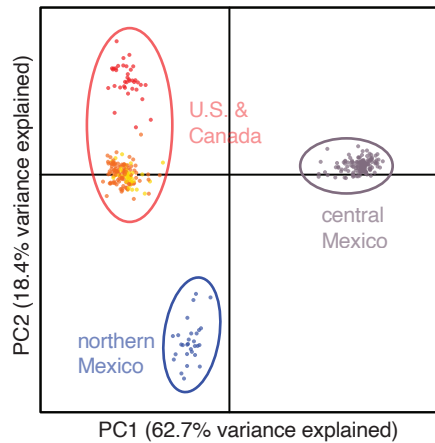

**Figure 1.** Results of discriminant analysis of principal components (DAPC) on (A) the entire genomic dataset (without *A. opacum* and *A. texanum* outgroups, and (B) the genomic dataset without the highly divergent *A. californiense*. In both plots, points represent individuals and ellipses show the groups identified by DAPC. The first and second principal components from the DAPC are on the x and y axes, respectively. Results from additional values of *K* are provided in Supplementary Figures 2 and 3.

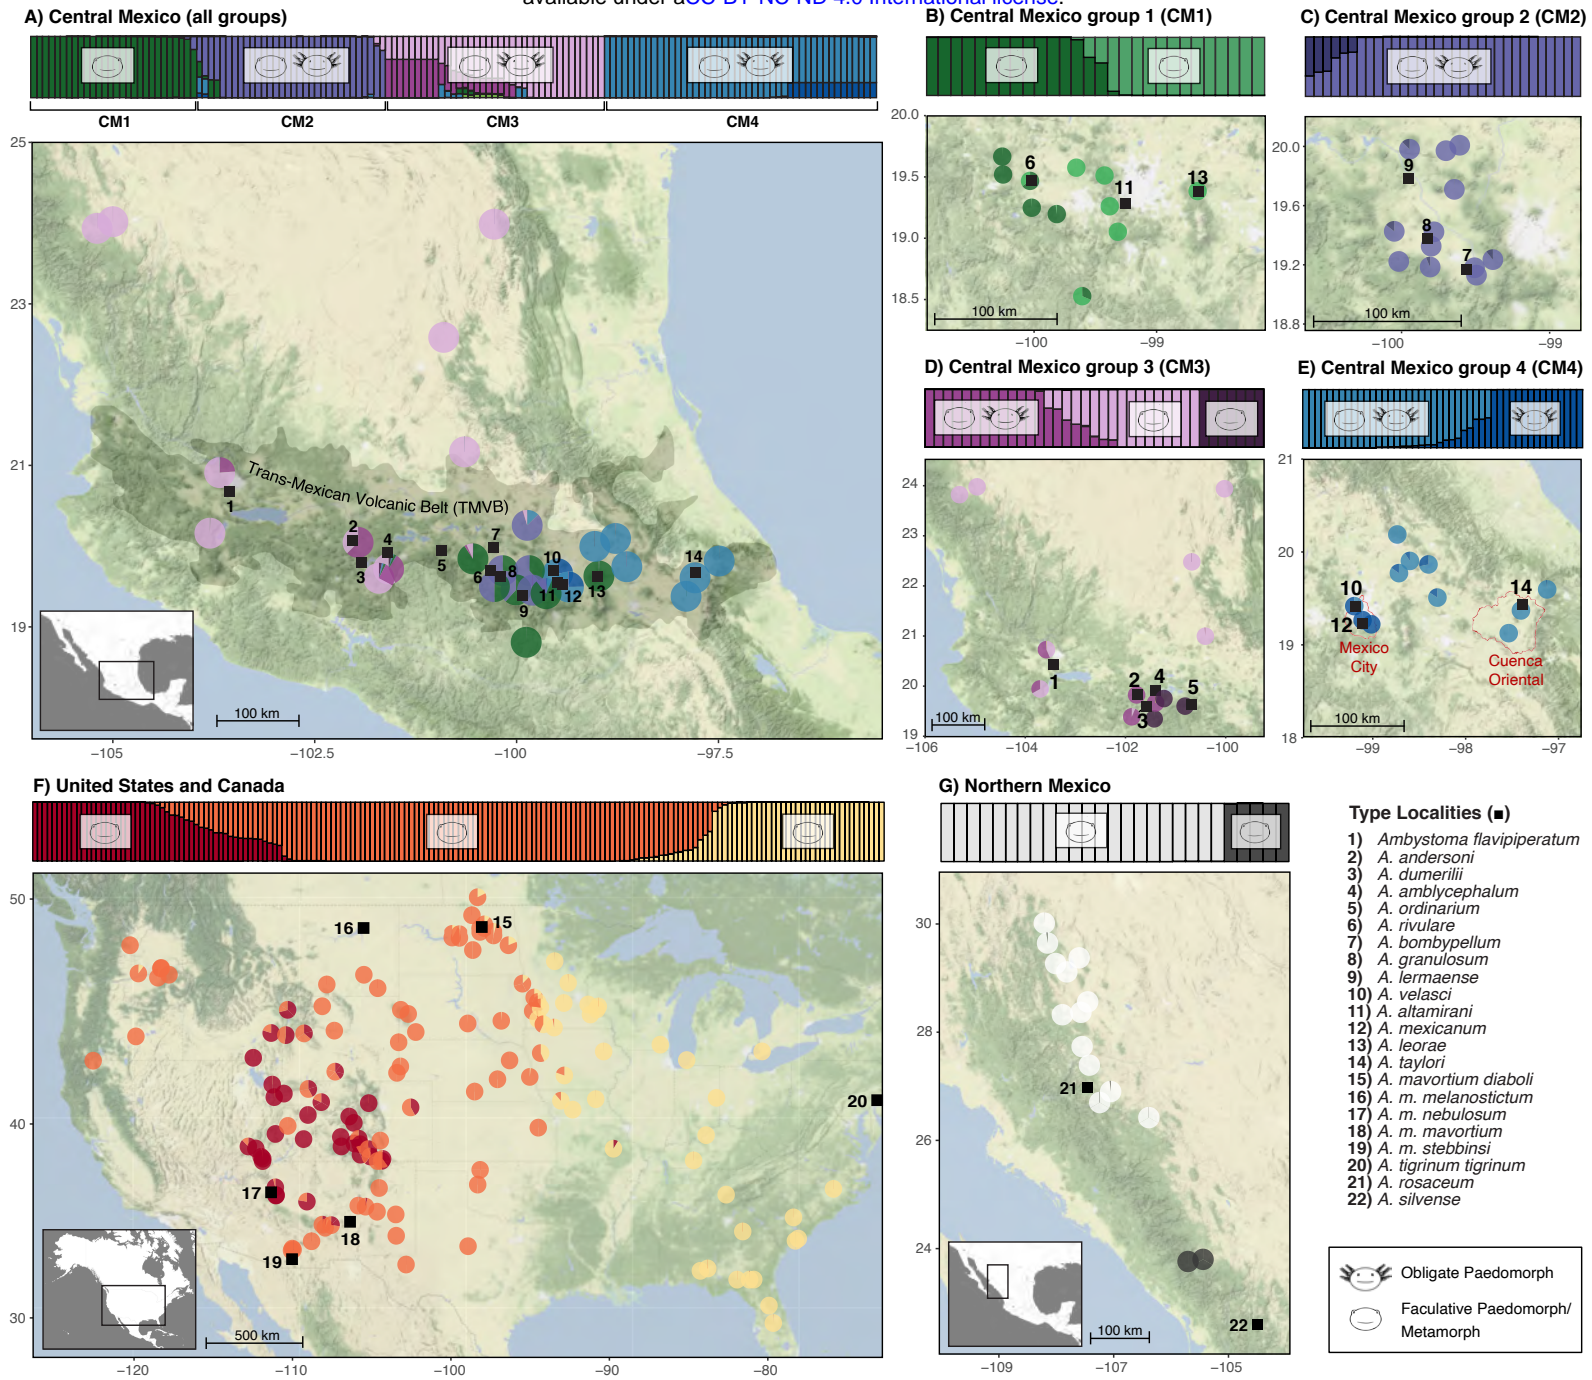

**Figure 2.** Results of population genomic analyses on the *Ambystoma tigrinum* species complex. (A) STRUCTURE analysis of the central Mexico cluster, which identified four major groups. Each vertical bar represents an individual, while the y-axis shows the membership probability for each group. Pie charts mapped below the assignment plot show the average group membership probability for that locality. Some localities were combined to a single pie chart to reduce visual clutter; see Table S1 for specific coordinates of each sample. The range of the Trans-Mexican Volcanic Belt (TMVB) is identified by shading and is modified from Ferrari (2004). (B-E) Detailed STRUCTURE analyses of each central Mexico subgroup CM1-CM4. A geographic outlier placed in CM2 is thought to represent a geographic range introduction and is not shown here, but is discussed in supplementary text and shown in Fig. S6. The range of the Cuenca Oriental is outlined in red and is modified from Percino-Daniel et al. (2016). (F,G) STRUCTURE results from analyses of the U.S. and northern Mexico groups, respectively. Detailed results are shown in Figs. S8-S9. Black squares on the maps denote the type localities of all species included in this study. On each STRUCTURE membership plot, salamander face symbols denote the presence of obligately or facultatively paedomorphic populations (with or without gills, respectively); groups labeled with both symbols contain a mixture of life history strategies.

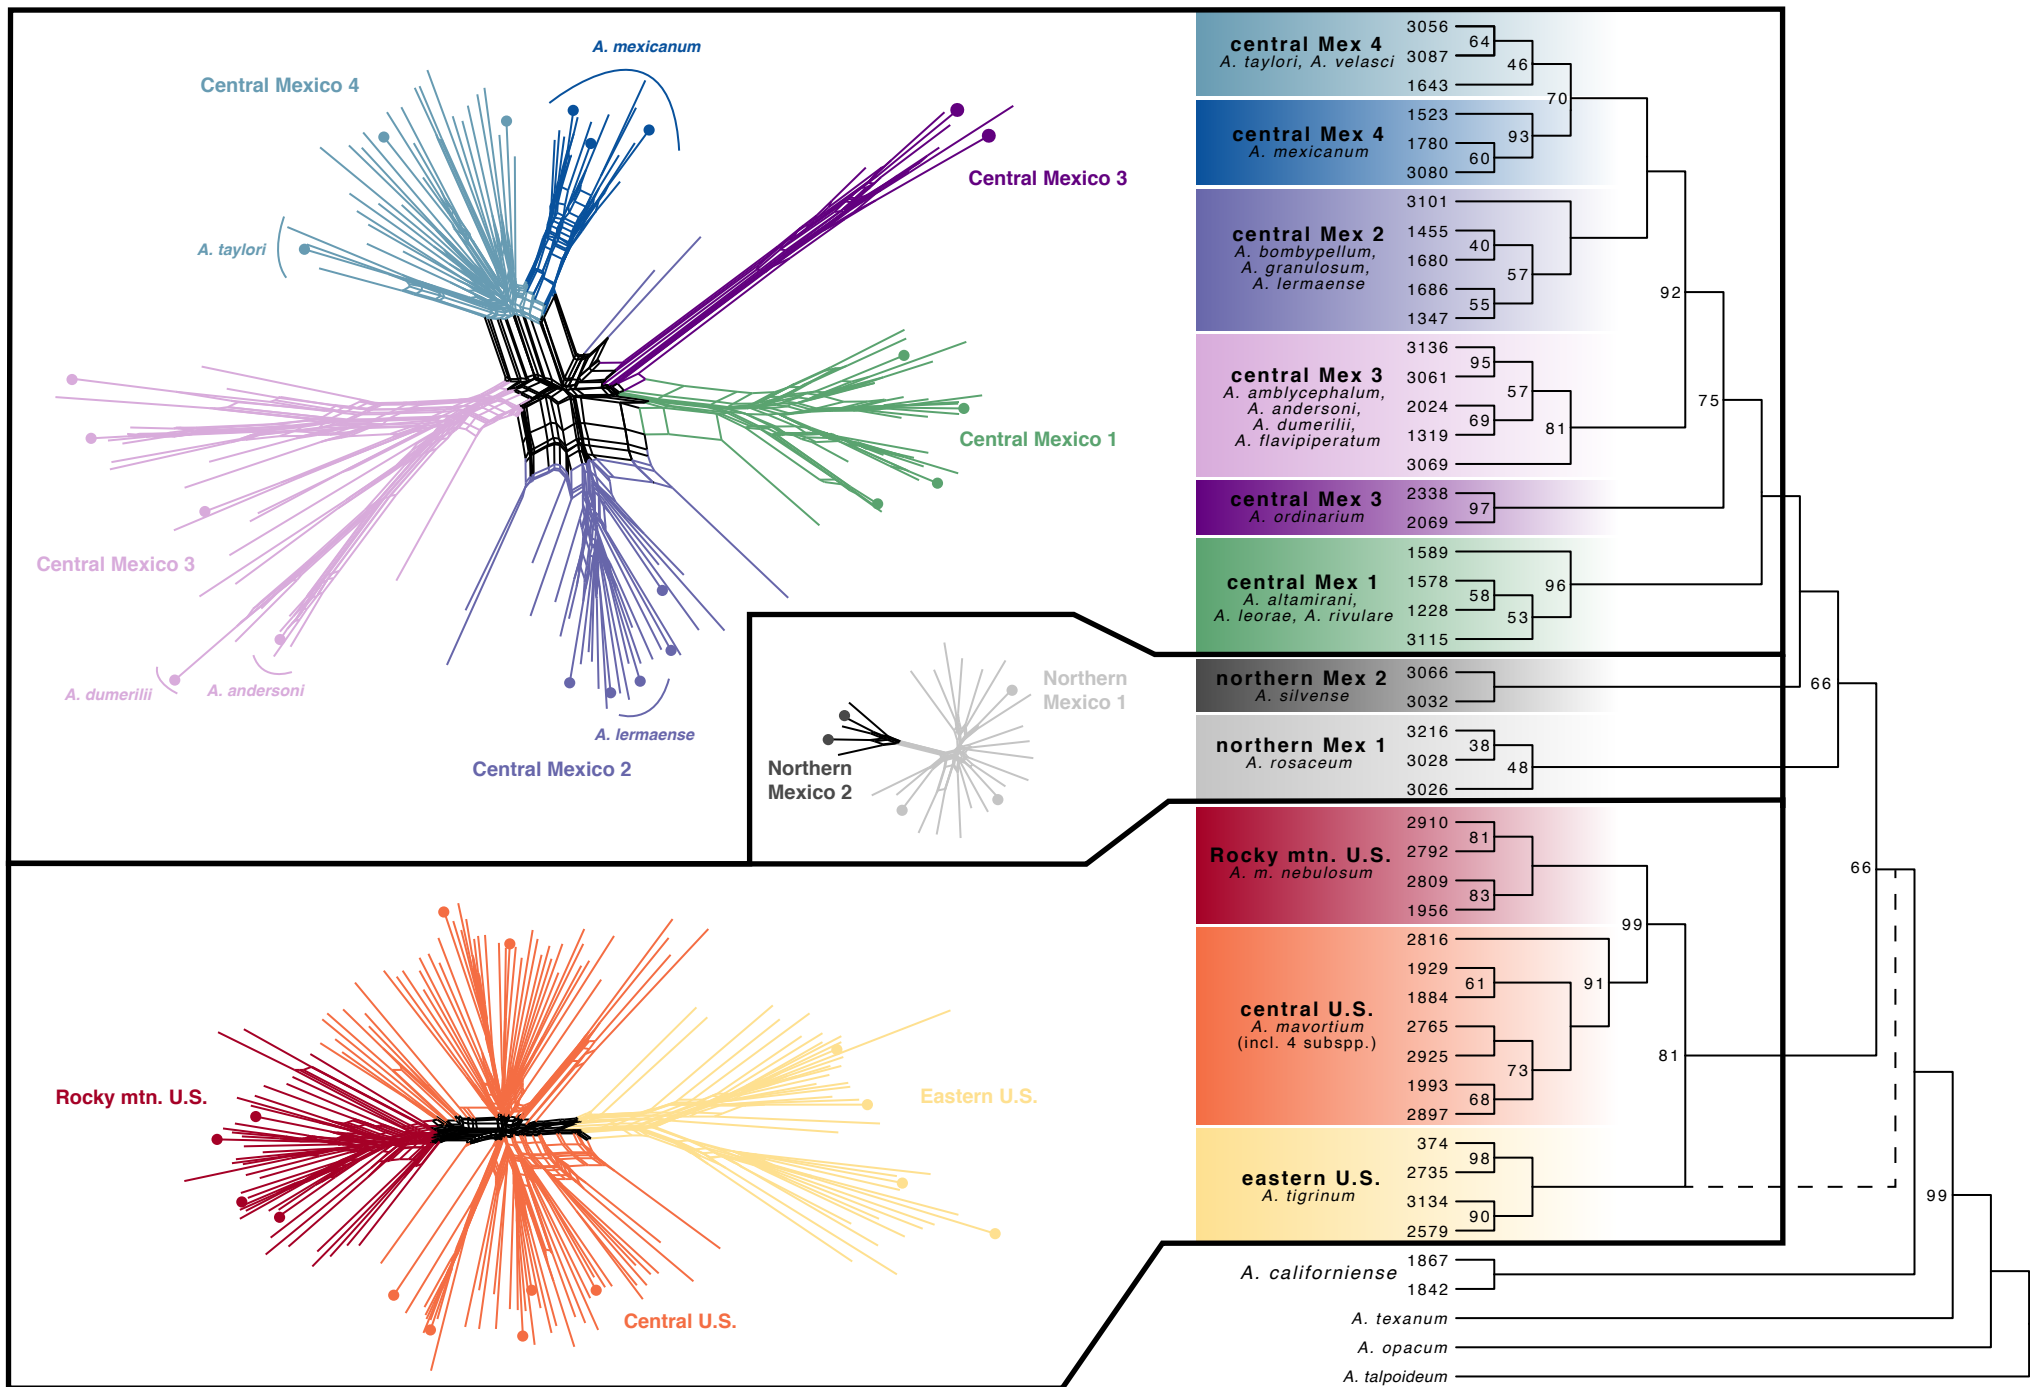

**Figure 3.** Results of phylogenetic network analyses (left) and the quartets-based phylogenetic analysis (right) of the *Ambystoma tigrinum* species complex. Clades are colored according to their cluster assignments in population genetic analyses, as shown in detail in Fig. 2. In phylogenetic networks, species names are only shown for taxa that are obligately or strongly pedomorphic; all other taxa (not shown) are considered to be facultatively pedomorphic or metamorphic. Note that the quartet tree analysis used a subset of individuals, indicated by solid circles on the phylogenetic networks. Phylogenetic results from Bayesian and maximum-likelihood concatenated analyses were largely concordant with the quartets tree (Fig. S10), although one important difference (the relationship of the eastern U.S. clade) is indicated by a dashed line. Bootstrap support (BS) values are indicated on each node of the quartets tree (BS values > 95 are not shown), while tips are labeled with individual IDs (Table S1). Branch lengths are not scaled to time or substitution rate.

152 analyses (41–43) recovered monophyletic CM1, CM2, and CM4 clusters (see below for  
153 discussion of CM3), but support values were often low within the central Mexico clade (Fig. 3).

154       Based on type locality and range information, the CM1 cluster includes three stream-  
155 breeding and facultatively paedomorphic taxa: *Ambystoma altamirani* Duges 1895 (44), *A.*  
156 *leorae* Taylor 1943 (45), and *A. rivulare* Taylor 1940 (9). We did not find evidence that these  
157 three taxa are reproductively isolated. Subsequent analyses of this cluster identified two admixed  
158 populations associated with eastern and western portions of its geographic distribution (Fig. 2B).  
159 Phylogenetically, CM1 was monophyletic and sister to all other central Mexican groups (Fig. 3),  
160 consistent with their original placement in a distinct genus, *Rhyacosiredon* Dunn 1928 (46).

161       Analyses of CM2 grouped *A. lermaense* Taylor 1940 (9) with samples corresponding to  
162 the type localities and range of *A. bombypellum* Taylor 1940 (9) and *A. granulorum* Taylor 1944  
163 (47). There was no evidence for genetic isolation among any of these three taxa (Fig. 2C).

164       Within CM3, population-genetic analyses first separated samples of *A. ordinarium* Taylor  
165 1940 (5) from the rest (with no hybridization detected; Fig 2D). Other samples were  
166 geographically structured according to the northern and southern portions of the distribution (Fig  
167 1E). The more southern cluster included two obligately paedomorphic taxa, *A. andersoni* Krebs  
168 & Brandon 1984 (32) and *A. dumerilii* Duges 1870 (48), each endemic to single lake systems  
169 (Lakes Zacapú and Pátzcuaro, respectively). However, our results identified admixture between  
170 these lakes and other nearby localities. The samples from other CM3 localities likely represent *A.*  
171 *amblycephalum* Taylor 1940 (9) and *A. flavipiperatum* Dixon 1963 (49).

172       CM4 included the axolotl, *A. mexicanum* Shaw & Nodder 1798 (50), and *A. taylori*  
173 Brandon et al. 1981 (10)—both primarily considered to be near-obligate paedomorphs—as well  
174 as samples assigned to the polymorphic *A. velasci* Duges 1888 (51). Subsequent DAPC and

175 STRUCTURE analyses of CM4 placed all but one *A. mexicanum* individual sampled from Lakes  
176 Xochimilco and Chapultepec (i.e., the remaining habitats of the axolotl) in a distinct cluster (Fig.  
177 2E, S7-S8), with evidence of some admixture in samples to the northwest of Mexico City.

178 We used a Bayesian model-testing framework (Fig. 4A) to test for genetic isolation of  
179 paedomorphic populations in three central Mexico groups. Specifically, we tested for the  
180 presence or absence of gene flow between (near) obligate paedomorphs (*A. andersoni* and *A.*  
181 *dumerilii* in CM3, and *A. mexicanum* and *A. taylori* in CM4) and their surrounding facultatively  
182 paedomorphic populations. We also tested for gene flow between *A. lermaense* [which has been  
183 described as “often neotenic [= paedomorphic]” (9, pg. 427)] and remaining populations in CM2.  
184 In four out of the five groups, we recovered models of bidirectional gene flow or complete  
185 panmixia between putatively obligate paedomorphs and facultative paedomorphs (Fig. 4B).  
186 Alternative models of no migration or unidirectional migration were rejected with decisive Bayes  
187 factors (Table S3). Migration rate estimates for full-migration scenarios consistently identified  
188 higher levels of gene flow from facultative to obligate paedomorphic populations. We found  
189 support for genetic isolation of one paedomorphic taxon, *A. andersoni* (Fig. 4B), a species  
190 endemic to Lake Zacapú, Michoacán. As we are unable to account for landscape barriers or  
191 sampling gaps in these analyses, we cannot be certain whether the lack of gene flow we  
192 recovered for *A. andersoni* is due to its paedomorphic life history or to its geography. Another  
193 important caveat to our migration analyses is that divergence time is not included as a model  
194 parameter, which prevents distinguishing between historical and contemporary gene flow. Thus,  
195 our ability to detect ongoing gene flow in these tests is limited.

196 Within the U.S. and Canada, DAPC and STRUCTURE identified three genetic clusters  
197 (K = 3) excluding the allopatric, more differentiated *A. californiense*, with clear signs of

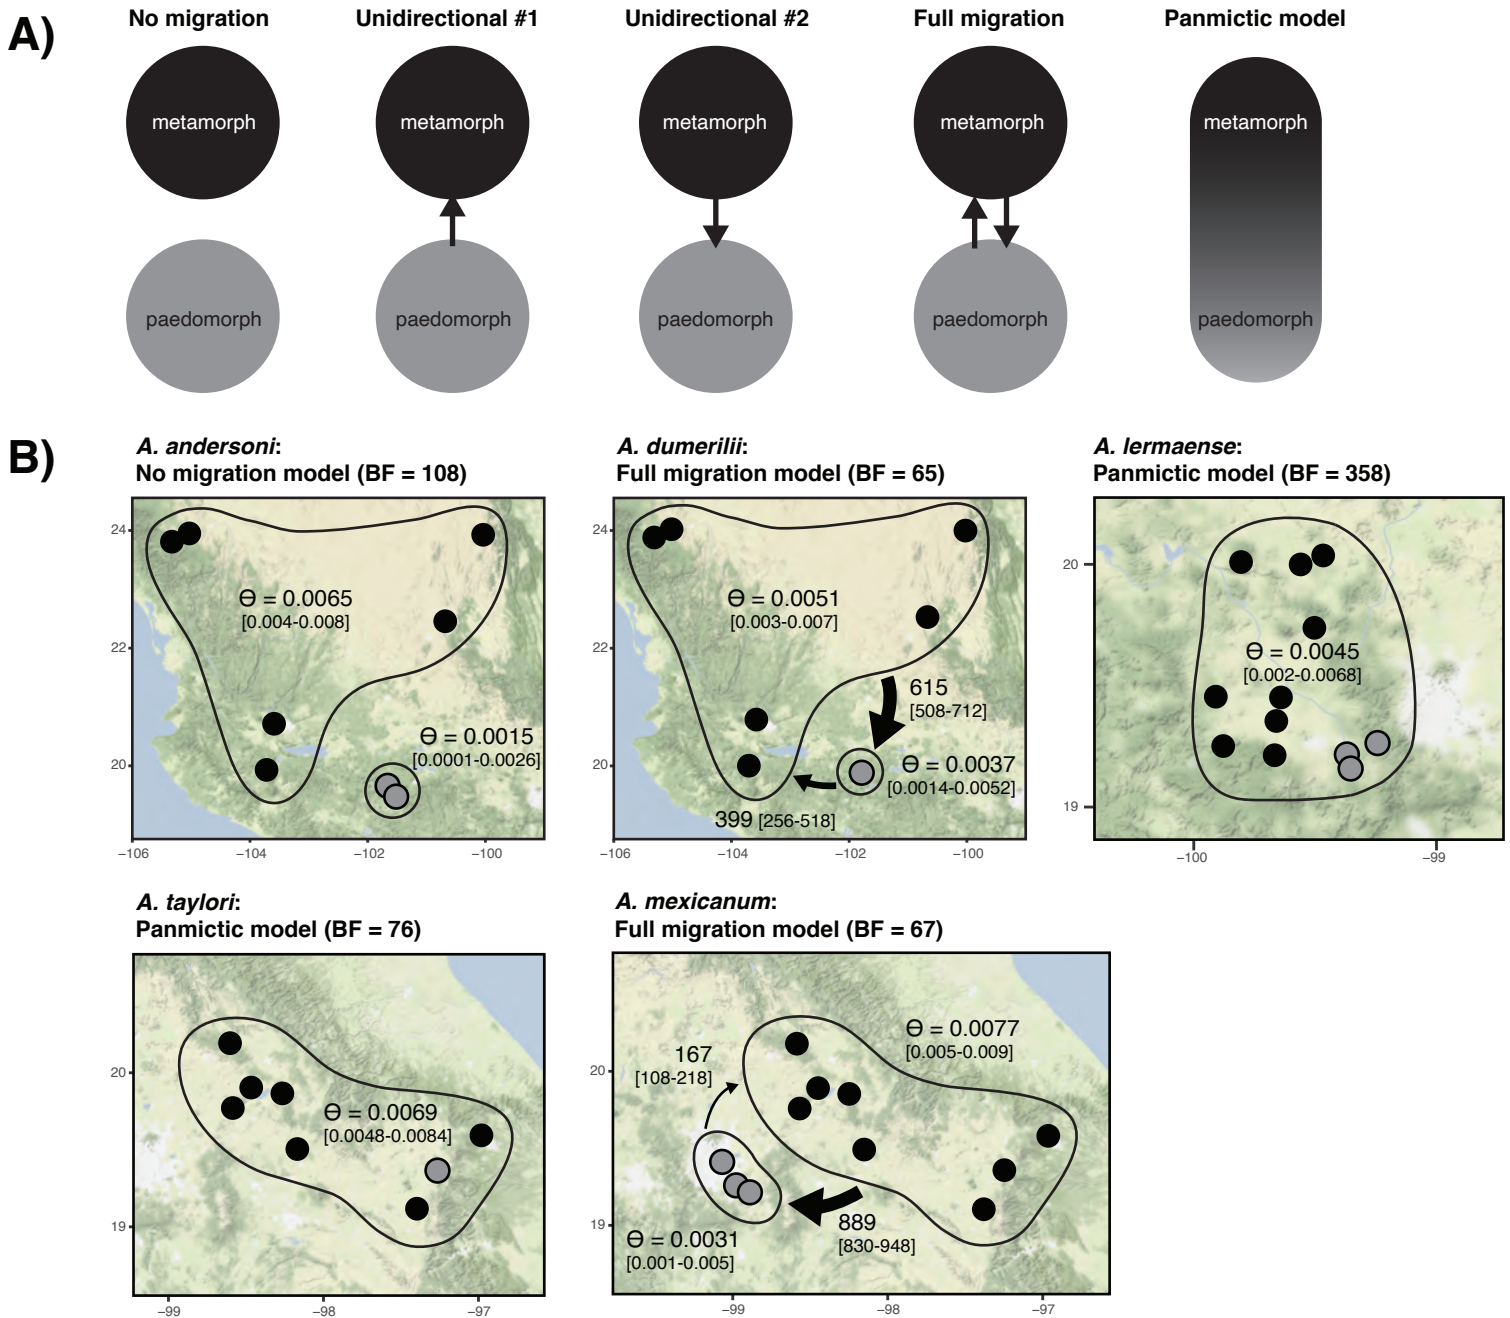

**Figure 4.** (A) Demographic models used to test hypotheses of gene flow. For each species considered to be obligately (*A. andersoni*, *A. dumerilii*, *A. taylori*, and *A. mexicanum*) or often (*A. lermaense*) paedomorphic, we evaluated five models of population structure and migration between that taxon and the facultatively paedomorphic taxa in the same genetic cluster (CM1-CM4). (B) Results of demographic model tests.  $\Theta$  denotes the median estimated mutation-scaled effective size of each population. Values next to each arrow are median mutation-scaled migration rates ( $M = m/\mu$ , where  $m$  is the fraction of immigrants in each generation and  $\mu$  is the mutation rate per generation per site). For both  $\Theta$  and  $M$ , 95% confidence intervals are shown in brackets below the median value. Gray circles denote obligately paedomorphic lineages, while black circles denote facultatively paedomorphic lineages.

198 admixture along zones of contact (Figs. 2F, S9, S10). Geographically, these clusters are  
199 associated with the eastern U.S., the central + western U.S., and the southwestern U.S. + Rocky  
200 Mountains (hereafter, we refer to the latter two groups as U.S. central and U.S. Rocky  
201 Mountains, respectively). Phylogenetic analyses corroborated these results, albeit with extensive  
202 reticulations among clusters in the phylogenetic network (Fig. 3) and mixed support for species-  
203 tree relationships among the three major groups (Fig. 3 vs. Fig. S12). Further exploration of  
204 population structure within each of the three U.S. clusters recovered additional patterns of  
205 differentiation (Figs. S9, S10), including northern and southern clusters in the eastern U.S. and  
206 central U.S., and an allopatric cluster restricted to the Pacific Northwest. Overall, our U.S. results  
207 are similar to mtDNA-based results from previous studies (11, 52), which identified haplotype  
208 clades associated with the eastern U.S., the northern Great Plains, the southern Great Plains, and  
209 the Pacific Northwest.

210 All analyses of the northern Mexico group identified two genetic clusters ( $K = 2$ ; Figs.  
211 2G, S11). The northern cluster corresponds to *A. rosaceum* Taylor 1941 (53), while the southern  
212 cluster could represent either a second population of *A. rosaceum* or *A. silvense* Webb 2004 (54);  
213 we did not include any samples from the type locality of *A. silvense* in this study. Phylogenetic  
214 analyses recovered each of these two northern Mexico clusters as monophyletic, but not sister to  
215 one another, and with few reticulate nodes in the phylogenetic network (Fig. 3, S12).

216

### 217 *The influence of life history on diversification*

218 A popular perspective on diversification in this species complex has been that the  
219 evolution of obligate paedomorphosis promotes reproductive isolation and, ultimately, speciation  
220 (10, 11). However, an important theme of our results is that taxa with different life history



221 strategies commonly cluster together by geography in population genetic and phylogeographic  
222 analyses (Figs. 2, 3). Moreover, our migration analyses support relatively recent gene flow  
223 and/or panmixia between facultative and paedomorphic populations (Fig. 4). Thus, the evolution  
224 of life history extremes does not appear to be the main driver of speciation in the tiger  
225 salamander complex. It is also worth noting that facultative paedomorphosis is the inferred  
226 ancestral condition (8) and nearly all extant lineages in the *Ambystoma tigrinum* complex are  
227 capable of metamorphosis, either in the wild or in the lab. Only *A. dumerilii* is not known to  
228 survive for long after metamorphosis (55). That only one described taxon in the complex is  
229 putatively fixed for paedomorphosis raises several questions: Are the rest of the primarily  
230 paedomorphic populations merely *en route* to fixation, rather than actually fixed? Do facultative  
231 populations fluctuate in paedomorphic frequency over time, dependent on prevailing  
232 environmental and/or demographic conditions (5)? Do transforming and non-transforming  
233 individuals readily interbreed outside of the laboratory setting? While these remain open  
234 questions, below we provide some relevant context for exploration and future research.

235         Theory predicts that paedomorphosis in salamanders is most likely to become fixed in a  
236 population when ecological conditions are favorable in the larval, aquatic environment but  
237 unfavorable on land (e.g., when terrestrial habitats are arid or resource-limited) (12, 56, 57).  
238 However, it is not known how long these fixations persist over evolutionary time; obligate  
239 paedomorphic lineages may have arisen and gone extinct multiple times over tiger salamander  
240 evolutionary history (58). One situation that would result in complete speciation is if  
241 paedomorphosis became fixed in the population and migration with surrounding facultatively  
242 paedomorphic populations ceased due to strong assortative mating and/or selection against  
243 hybrids (59–61). However, assortative mating within life history morphs has not been

244 demonstrated in other salamander groups (62–64) and there is evidence that different tiger  
245 salamander morphs do interbreed (65). In fact, the only known instance of positive assortative  
246 mating in *A. tigrinum* is associated with tail length (66, 67), which might favor metamorphosed  
247 males as paedomorphic individuals can have relatively short tails (32). The evidence for  
248 selection against intermorph offspring is also scarce. Captive breeding using artificial fertilization  
249 has produced *A. mexicanum* x *A. tigrinum* hybrids (7, 31, 68) as well as *A. dumerilii* x *A.*  
250 *tigrinum* and *A. dumerilii* x *A. rivularis* hybrids, although the fertility of offspring was not  
251 investigated in *A. dumerilii* crosses (31). This suggests that postzygotic barriers are weak,  
252 although the extent to which divergent lineages would interbreed in the wild remains a key  
253 question in need of investigation.

254         If biological barriers to reproduction are limited or absent, there are several potential  
255 mechanisms by which dispersal could mediate gene flow between paedomorphic and  
256 metamorphic populations. First, metamorphosed individuals from facultatively paedomorphic  
257 populations could move into bodies of water containing paedomorphic populations. Our  
258 demographic analyses support this scenario, as they recovered higher rates of migration entering  
259 rather than exiting obligately paedomorphic groups (Fig. 4). However, demographic analyses  
260 also estimated non-zero emigration out of paedomorphic populations; thus, “obligate”  
261 paedomorphs might also occasionally metamorphose and disperse. Occasional metamorphosis  
262 has been documented in several putatively paedomorphic populations (9, 10, 33, 69, 70) and  
263 metamorphosis can occur at higher frequencies in dispersing males in facultative populations  
264 (71). Even a low frequency of transformed adults is likely sufficient to maintain evolutionary  
265 cohesion with surrounding populations (10, 29, 72). Finally, gene flow may not necessarily be  
266 mediated across a terrestrial environment; genetic connectivity could also be maintained if

267 populations have been forced into contact by water level fluctuations in the groundwater system  
268 of a region. The dynamic lacustrine history of the Cuenca Oriental (73), for instance, suggests  
269 that isolation of some paedomorphic populations has been punctuated by broader aquatic  
270 connections over short geological time scales, potentially facilitating gene flow. Collectively,  
271 these mechanisms are likely to explain the maintenance of geographic genetic groups, now or in  
272 the evolutionarily recent past, containing a range of life histories.

273         The genetic cohesion we detected across wide swaths of the TMVB is particularly  
274 striking given other evidence for local adaptation in this region. This scenario is perhaps best  
275 exemplified in the Cuenca Oriental (Fig. 2E), where some lakes contain paedomorphic  
276 salamanders adapted to saline conditions, a very rare trait among amphibians (74). At one site,  
277 the saline Lake Alchichica, the population is currently considered a distinct species (*A. taylori*)  
278 (10). However, our results indicate that *A. taylori* is not genetically distinct from surrounding,  
279 putatively non-saline-adapted populations, a result consistent with a previous microsatellite-  
280 based study that found significant gene flow to and from *A. taylori* (29). While we cannot rule  
281 out the potential for localized signatures of selection and adaptation in the *A. taylori* genome, our  
282 results highlight that even populations adapted to aquatic conditions intolerable to most other  
283 *Ambystoma* have not reached a level of isolation consistent with an independent evolutionary  
284 trajectory (75).

285

#### 286 *Comparisons to previous work*

287         This study included extensive geographic sampling of the tiger salamander complex,  
288 which provided a broad spatial context to more fully understand patterns of genetic variation.  
289 However, it is important to consider the possibility that our data are simply not sensitive enough

290 to detect genetic differentiation associated with lineage divergence on an extremely recent time  
291 scale. The common ancestor of *A. californiense* and the remainder of the species complex dates  
292 to approximately five million years (11, 37), and phylogenomic data indicate that speciation  
293 across the remaining tiger salamander lineages occurred within the last one million years (76).  
294 Such timing could make lineage boundaries difficult to detect (15). In this context, our genome-  
295 wide markers, developed from transcriptomic resources (35), may not have an overall  
296 substitution rate sufficient to detect genetic differentiation. We recommend that future research  
297 uses a larger genomic dataset or faster-evolving loci with particular focus on the sampling of  
298 obligate paedomorphs in this system. To this point, perhaps the strongest evidence for the genetic  
299 divergence of obligately paedomorphic populations comes from past microsatellite-based work  
300 indicating the genetic distinctiveness of *A. andersoni* and *A. mexicanum* from a select set of  
301 populations across central Mexico (77) and the genetic distinctiveness of *A. taylori* from  
302 neighboring populations in the Cuenca Oriental (29). Both of these studies recovered signatures  
303 of gene flow, but identified greater overall population structure compared to this study. These  
304 previous results could be due to numerous factors, including a faster microsatellite mutation rate,  
305 methodological differences, and more limited locality sampling.

306

## 307 CONCLUSIONS

308 The extent to which populations within the tiger salamander complex exhibit phenotypic  
309 plasticity in life history traits is remarkable and is believed to have played a role in the rapid  
310 accumulation of lineages observed in the highlands of central Mexico (11, 61). While our results  
311 suggest there is less species-level diversity in that region than previously recognized, there is  
312 clearly more diversity in central Mexico compared to the US and Canada where there is (a) more

313 geographic space and (b) less life history variation within and between lineages. While we  
314 cannot fully explain the greater diversity in Central Mexico, our results suggest that major  
315 patterns of diversification are related to a complex history of geographic isolation and secondary  
316 contact, in which life history strategy has played a less important role. We agree with previous  
317 work (12) that the complex geological history of the TMVB, including montane uplift and  
318 fluctuating drainage connectivity since the Miocene, has been the cornerstone of the evolutionary  
319 history of this species complex, and that the influences of geographic isolation and  
320 paedomorphosis may work synergistically to lead to the establishment of isolated populations.  
321 Lingering questions notwithstanding, this large-scale genetic and geographic study has  
322 established a framework for understanding the evolutionary history of the *Ambystoma tigrinum*  
323 species complex. The results presented here will facilitate comparative studies of the axolotl and  
324 its allies, provide direction for conservation prioritization and management, and strengthen the  
325 use of the tiger salamander species complex as a model system in biology.

326

## 327 **MATERIALS & METHODS**

### 328 *Geographic sampling*

329 We generated data from a total of 254 individuals sampled from across the range of the  
330 *A. tigrinum* complex (Fig. S1; Table S1). These individuals were combined with 93 individuals  
331 sampled in O'Neill et al. (35) to produce a data set comprising 347 individuals. To represent the  
332 large geographic range of this species complex, we chose to sample a large number of localities  
333 (188) with limited numbers of individuals sampled per locality (mean = 1.8, min. = 1, max. = 9).  
334 This sampling included a total of 166 individuals from the US, 2 individuals from Canada, and  
335 178 individuals sampled from Mexico. Individuals of *A. californiense* were sampled from

336 localities with limited to no impacts of introgression from invasive western tiger salamanders  
337 (52). Additional outgroup data were generated for two species outside of the *A. tigrinum*  
338 complex: *A. opacum* and *A. texanum*. Full details regarding the generation of these data can be  
339 found in the Supplementary Materials.

340

#### 341 *Data collection and sequencing*

342 We generated DNA sequence data from a panel of 95 nuclear loci developed specifically  
343 for the tiger salamander species complex. A more complete description of marker development  
344 can be found in O'Neill et al. (35). Genomic DNA was extracted using a DNeasy Blood and  
345 Tissue kit (Qiagen). For a small number of DNA extractions, we increased DNA quantities using  
346 a Repli-g whole genome amplification kit (Qiagen). We used an initial round of PCR in 96-well  
347 plate format to amplify all loci from an individual, followed by a smaller second round of PCR to  
348 amplify loci that did not amplify in the initial PCR. See O'Neill et al. (35) for the details of PCR  
349 conditions and primer sequences.

350 PCR products from all loci were pooled for each individual in roughly equal  
351 concentrations based on the intensity of amplification as visualized on an agarose gel. Indexed  
352 Illumina sequencing libraries were generated for each individual using an Illumina Nextera XT  
353 DNA Library Preparation Kit (Illumina). Subsequent to library preparation, indexed libraries  
354 were quantified using a Qubit Fluorometer, pooled in equimolar concentrations, and checked on  
355 an Agilent Bioanalyzer to assure proper fragmentation.

356 Sequencing was performed in four rounds using an Illumina MiSeq. We performed an  
357 initial round using a total of seven individuals to test the compatibility of the Illumina Nextera  
358 XT library kit with our PCR amplicons. Three subsequent rounds of library preparation and

359 sequencing were performed on sets of 96 individuals each. Note that some individuals were  
360 sequenced in multiple rounds due to initially low read counts. All sequencing was performed  
361 with paired-end 150 bp reads. Overall, we generated a total of 29,426,894 PE reads across all  
362 newly sequenced individuals, with an average of 309,757 PE reads, 1,148X coverage, and 7.6%  
363 missing loci per individual (Table S2).

364

### 365 *Bioinformatics and dataset generation*

366 All sequence reads were processed using a newly developed bioinformatic pipeline  
367 written for this project (<https://doi.org/10.5281/zenodo.3585970>) that produces multiple  
368 sequence alignments for individual loci and genome-wide SNP matrices sampled from variable  
369 sites. This pipeline was developed using the Snakemake workflow management system (78),  
370 linking together multiple software tools to take sequence data from raw reads to phased sequence  
371 alignments for each locus. Briefly, as used in this study, demultiplexed paired-end Illumina fastq  
372 files were used as input, with separate forward and reverse read files for each individual.  
373 Sequence data were trimmed and filtered in Trimmomatic (79) using a sliding window of 4 base-  
374 pairs and a minimum average quality score of 15. Filtered sequence reads were then aligned to  
375 reference sequences from the O'Neill et al. (2013) dataset (35); specifically, we used the clean  
376 sequences of an *A. ordinarium* sample that had high coverage and low amounts of missing data.  
377 The resulting aligned contigs were processed using SAMtools (80) to filter and prepare data for  
378 FreeBayes (81), which was used to call variable sites. Variants were filtered with VCFTools (82)  
379 by removing indels and setting a quality threshold of phred score > 20 and a minimum read  
380 depth of 30. The program WhatsHap (83) was used to perform read-based phasing of the data for  
381 each locus x individual contig. Finally, phased haplotypes from each individual (two copies,

382 regardless of homo- or heterozygosity) were combined into an alignment of all individuals using  
383 MAFFT with the default auto parameter (84). We generated fasta files of SNPs using the SNP-  
384 sites program (85) and created a SNP genotype matrix by sampling variable sites from a  
385 concatenated sequence alignment of all loci. Through our informatic processing and manual  
386 inspections of the data, we identified three loci (E12G1, E6A11, and E7G8) as potential paralogs  
387 based on high alignment error and high levels of heterozygosity for all individuals. These three  
388 loci were excluded from all analyses.

389         Across the remaining 92 loci, alignment lengths ranged from 123 to 630 bp (avg. = 270  
390 bp) with a total concatenated alignment of 24,788 bp. For the full dataset, including *A. texanum*  
391 and *A. opacum* outgroups, single-locus alignments contained an average of 55 variable sites  
392 (min. = 15, max. = 121) and an average of 41 parsimony informative sites (min. = 11, max. =  
393 102). Population genetic analyses restricted to the *A. tigrinum* complex including *A.*  
394 *californiense*—which were further filtered for non-biallelic SNPs and a minor allele count  $\geq 3$ —  
395 contained a total of 2,360 SNPs.

396

### 397 *Population structure and lineage discovery*

398         We developed hypotheses of population-level lineages across the range of the *A. tigrinum*  
399 complex using a bottom-up approach, starting with the identification of major geographic  
400 patterns of differentiation, and then performing a recursive set of analyses on more restricted sets  
401 of individuals, as identified in the previous analytical step. In our initial round of analyses we  
402 used two non-parametric methods: principal components analysis (PCA) and discriminant  
403 analysis of principal components (DAPC) (36). While both analyses provide a multivariate  
404 summary of genetic data, DAPC is also used to assess the fit of data to varying numbers of



405 population clusters. These analyses were applied to our full genotypic dataset including *A.*  
406 *californiense* and all remaining individuals from the *A. tigrinum* complex. The PCA was  
407 calculated using the function ‘prcomp’ in the R package stats (86), while the DAPC was  
408 calculated using the package adegenet (87). The optimal number of principal components to  
409 retain for DAPC was identified using cross-validation via the xvalDapc function with default  
410 parameter values. DAPC was performed without prior assignment of individuals to groups and  
411 an exploratory approach was used to identify patterns of differentiation in ordination space  
412 across a range of cluster levels ( $K = 1-20$ ). We used two metrics to identify the best estimate of  
413 the primary splits in our data. First, we used the Bayesian Information Criterion (BIC) calculated  
414 in the DAPC analysis to assess the fit of the data to different levels of  $K$ . We note that the level  
415 of  $K$  with the absolute lowest BIC may not be a better explanation of the data than a  $K$  with a  
416 slightly higher BIC (88); therefore, we applied this measure for general guidance on a range of  $K$   
417 that may describe the data well. We paired this assessment with visualizations of the first and  
418 second principal components (Fig. S2, S4) and DAPC ordination plots to identify the level of  $K$   
419 at which similar clustering patterns could be observed with minimal change at successively  
420 higher levels of  $K$ . DAPC of the complete tiger salamander species complex identified a  
421 consistent pattern beginning at  $K = 5$  for high differentiation of all *A. californiense* samples (Fig.  
422 S3). Further DAPC analysis with *A. californiense* removed identified a consistent pattern  
423 beginning at  $K = 5$  for differentiation between clusters of populations from northern and central  
424 Mexico, and three clusters of U.S. populations (two from the Western U.S. and one from the  
425 Eastern U.S.; Fig. S5).

426         Using the clusters identified in the DAPC analysis of the total data set, we then used both  
427 DAPC and the program STRUCTURE v.2.3.4 (89) to analyze subsequent data sets comprising

428 smaller numbers of individuals. Recursive rounds of DAPC analyses were performed as  
429 described above and were stopped when BIC scores showed little improvement ( $\Delta\text{BIC} < 2$ ) at  
430 values of  $K > 1$ . STRUCTURE analyses were performed using an admixture model and a total of  
431 500,000 generations following a burn-in of 100,000 generations. Analyses were performed for  $K$   
432 = 1-10 with 16 replicate analyses. We identified a “best” value of  $K$  using two approaches. First,  
433 we calculated  $\Delta K$  using the Evanno method (91) via the CLUMPAK web tool (90). A limitation  
434 of the Evanno method is that it cannot identify the best value of  $K = 1$  (91), thus, we also visually  
435 inspected individual group assignments and concluded a value of  $K = 1$  if the corresponding  
436 DAPC cluster showed little improvement ( $\Delta\text{BIC} < 2$ ) at values of  $K > 1$ , or when visualization  
437 showed extensive admixture without distinct clustering.

438

#### 439 *Tests of migration and population structure*

440 We used the coalescent-based program Migrate-N v.3.2 (92) to explicitly test for  
441 population structure and gene flow in each obligately paedomorphic species of *Ambystoma* (*A.*  
442 *andersoni*, *A. dumerilii*, *A. taylori*, and *A. mexicanum*, plus the “often neotenic” species *A.*  
443 *lermaense*). For each model we evaluated (Fig. 4A), we treated the obligately paedomorphic  
444 species as one population, and the facultatively paedomorphic individuals from the same genetic  
445 cluster (CM2-CM4) as the second population. The best-fitting model was determined via Bayes  
446 factors (BF), which were calculated using Bézier-corrected marginal likelihoods (Table S2); the  
447 highest-ranking models have a BF = 0. Each Migrate-N analyses ran for 50 million steps,  
448 recording every 10 steps, with a burn-in of five million and the default heating scheme. Suitable  
449 upper bounds for priors on population size ( $\Theta$ ) and migration rate ( $M$ ) were determined from an

450 initial test run of 10 million steps for each analysis. Median values and 95% confidence intervals  
451 of  $\Theta$  and  $M$  are reported (Fig. 4B).

452

### 453 *Phylogenetic reconstruction*

454 As our dataset included a large number of admixed individuals, we estimated  
455 phylogenetic networks to visualize reticulation events. We used SplitsTree v. 4.14.8 (40, 93) to  
456 generate four networks: one with all tiger salamander individuals, and one each for the U.S.,  
457 central Mexico, and northern Mexico subgroups. Networks were constructed using uncorrected  
458 p-distances and the NeighborNet algorithm (94).

459 We also used three different analytical approaches to place hypothesized population  
460 lineages in a phylogenetic framework. For all analyses we used a reduced data set containing the  
461 concatenated data for 2-7 representative individuals from each population genetic cluster, which  
462 limited computation time and avoided violating the coalescent-model assumption of zero gene  
463 flow. We first inferred the phylogeny using Bayesian Inference in BEAST v.1.8.3 (42). Analyses  
464 were run for 5 million generations, sampling every 1,000 generations after the first 500,000  
465 generations were removed as burn-in. Run convergence was assessed with Tracer v.1.6.0 (95).  
466 Next, we inferred a maximum-likelihood phylogeny using RAxML v.8 (43). Node support was  
467 assessed using a rapid bootstrap analysis with 1,000 replicates, which was summarized as a 95%  
468 rule consensus tree using the program SumTrees in the DendroPy python library (96). For both  
469 BEAST and RAxML, PartitionFinder (97) was used to identify the number of preferred gene  
470 partitions and their substitution models, and analyses were performed on the CIPRES Science  
471 Gateway server (98). Finally, we inferred phylogenetic relationships using SVDquartets (41)  
472 implemented in PAUP\* version 4.0a164 (99), sampling all possible quartets and assessing node

473 support with 1,000 bootstrap replicates. For all phylogenetic analyses, trees were visualized  
474 using FigTree v.1.4.2 (100).

475

#### 476 **DATA AVAILABILITY**

477       Supplementary figures and tables are provided with the online version of this manuscript.  
478 Input files for all population genetic and phylogenetic analyses are available via figshare  
479 ([https://figshare.com/projects/Life\\_history\\_strategy\\_does\\_not\\_reflect\\_genetic\\_differentiation\\_in](https://figshare.com/projects/Life_history_strategy_does_not_reflect_genetic_differentiation_in_the_tiger_salamander_species_complex/74115)  
480 [\\_the\\_tiger\\_salamander\\_species\\_complex/74115](https://figshare.com/projects/Life_history_strategy_does_not_reflect_genetic_differentiation_in_the_tiger_salamander_species_complex/74115)). Sequence data are available on the NCBI  
481 Sequence Read Archive (BioProject accession PRJNA594660).

482

#### 483 **ACKNOWLEDGEMENTS**

484       This project was supported by grants from the National Science Foundation (DEB-  
485 0949532, DEB-1355000, and a Doctoral Dissertation Improvement Grant awarded to Justin  
486 Kratovil) and by a University Research Fellowship awarded to Kathryn Everson from the  
487 University of Kentucky. We thank numerous individuals for contributing samples to this project,  
488 including Chris Beachy, Jim Bogart, Ken Carbale, Sheri Church, Jeff LeClere, Carol Hall, Paul  
489 Moler, Nancy Staub, and Ken Wray. We are grateful to Jose Bocanegra, Ben Browning,  
490 Mackenzie Humphrey, Mary Virginia Gibbs, Ricky Grewelle, Alan Lemmon, Emily Moriarty  
491 Lemmon, Deborah Lu, Stephanie Mitchell, Alex Noble, Tolu Odukoya, Ben Tuttle, and Josh  
492 Williams for their assistance with data collection and analyses.

493

494 **REFERENCES**

- 495 1. S. R. Palumbi, Marine speciation on a small planet. *Trends Ecol. Evol.* **7**, 114–118 (1992).
- 496 2. S. Mopper, S. Y. Strauss, *Genetic Structure and Local Adaptation in Natural Insect*  
497 *Populations: Effects of Ecology, Life History, and Behavior* (Springer US, 1998).
- 498 3. S. J. Gould, *Ontogeny and Phylogeny* (Harvard University Press, 1977).
- 499 4. D. B. Wake, Paedomorphosis. *J. Herpetol.* **14**, 80 (1980).
- 500 5. H. H. Whiteman, Evolution of facultative paedomorphosis in salamanders. *Q. Rev. Biol.*  
501 **69**, 205–221 (1994).
- 502 6. R. B. Page, *et al.*, Effect of thyroid hormone concentration on the transcriptional response  
503 underlying induced metamorphosis in the Mexican axolotl (*Ambystoma*). *BMC Genomics*  
504 **9**, 78 (2008).
- 505 7. S. R. Voss, Genetic Basis of Paedomorphosis in the Axolotl, *Ambystoma mexicanum*: A  
506 Test of the Single-Gene Hypothesis. *J. Hered.* **86**, 441–447 (1995).
- 507 8. S. R. Voss, H. B. Shaffer, Adaptive evolution via a major gene effect: paedomorphosis in  
508 the Mexican axolotl. *Proc. Natl. Acad. Sci. USA* **94**, 14185–9 (1997).
- 509 9. E. H. Taylor, New salamanders from Mexico with a discussion of certain known forms.  
510 *Univ. Kansas Sci. Bull.* **26**, 407–439 (1939).
- 511 10. R. Brandon, E. Maruska, W. Rumph, A new species of neotenic *Ambystoma* (Amphibia,  
512 Caudata) endemic to Laguna Alchichica, Puebla, Mexico. *Bull. South. Calif. Acad. Sci.*  
513 **80**, 112–125 (1981).
- 514 11. H. B. Shaffer, M. L. McKnight, The polytypic species revisited: Genetic differentiation  
515 and molecular phylogenetics of the tiger salamander *Ambystoma tigrinum* (Amphibia:  
516 Caudata) complex. *Evolution* **50**, 417–433 (1996).

- 517 12. H. B. Shaffer, Evolution in a paedomorphic lineage. I. An electrophoretic analysis of the  
518 Mexican ambystomatid salamanders. *Evolution* **38**, 1194–1206 (1984).
- 519 13. H. B. Shaffer, Phylogenetics of model organisms: The laboratory axolotl, *Ambystoma*  
520 *Mexicanum*. *Syst. Biol.* **42**, 508–522 (1993).
- 521 14. H. B. Shaffer, Evolution in a paedomorphic lineage. II. Allometry and form in the  
522 Mexican ambystomatid salamanders. *Evolution* **38**, 1207–1218 (1984).
- 523 15. H. B. Shaffer, R. C. Thomson, Delimiting Species in Recent Radiations. *Syst. Biol.* **56**,  
524 896–906 (2007).
- 525 16. P. R. Grant, Speciation and the adaptive radiation of Darwin’s finches. *Am. Sci.* **69**, 653–  
526 663 (1981).
- 527 17. O. Seehausen, Explosive speciation rates and unusual species richness in haplochromine  
528 cichlid fishes: Effects of sexual selection. *Adv. Ecol. Res.* **31**, 237–274 (2000).
- 529 18. M. Fegan, P. Prior, “How complex is the *Ralstonia solanacearum* species complex” in  
530 *Bacterial Wilt Disease and the Ralstonia Solanacearum Species Complex*, C. Allen, P.  
531 Prior, A. C. Hayward, Eds. (American Phytopathological Society Press, 2005), pp. 449–  
532 461.
- 533 19. J. Mallet, Hybrid speciation. *Nature* **446**, 279–283 (2007).
- 534 20. M. C. Fontaine, *et al.*, Extensive introgression in a malaria vector species complex  
535 revealed by phylogenomics. *Science* **347**, 1258524 (2015).
- 536 21. J. Geml, G. A. Laursen, K. O’Neill, H. C. Nusbaum, D. L. Taylor, Beringian origins and  
537 cryptic speciation events in the fly agaric (*Amanita muscaria*). *Mol. Ecol.* **15**, 225–239  
538 (2005).
- 539 22. K. S. Jones, D. W. Weisrock, Genomic data reject the hypothesis of sympatric ecological

- 540 speciation in a clade of *Desmognathus* salamanders. *Evolution* **72**, 2378–2393 (2018).
- 541 23. R. Newman, Adaptive plasticity in amphibian metamorphosis. *Bioscience* **42**, 671–678  
542 (1992).
- 543 24. H. H. Whiteman, S. A. Wissinger, W. S. Brown, Growth and foraging consequences of  
544 facultative paedomorphosis in the tiger salamander, *Ambystoma tigrinum nebulosum*.  
545 *Evol. Ecol.* **10**, 433–446 (1996).
- 546 25. P. J. Fernandez, J. P. Collins, Effect of environment and ontogeny on color pattern  
547 variation in Arizona tiger salamanders (*Ambystoma tigrinum nebulosum* Hallowell).  
548 *Copeia* **1988**, 928 (1988).
- 549 26. S. P. D. Riley, H. B. Shaffer, S. R. Voss, B. M. Fitzpatrick, Hybridization between a rare,  
550 native tiger salamander (*Ambystoma californiense*) and its introduced congener. *Ecol.*  
551 *Appl.* **13**, 1263–1275 (2003).
- 552 27. D. W. Weisrock, H. B. Shaffer, B. L. Storz, S. R. Storz, S. R. Voss, Multiple nuclear gene  
553 sequences identify phylogenetic species boundaries in the rapidly radiating clade of  
554 Mexican ambystomatid salamanders. *Mol. Ecol.* **15**, 2489–2503 (2006).
- 555 28. G. Parra-Olea, *et al.*, Conservation genetics of threatened Mexican axolotls (*Ambystoma*).  
556 *Anim. Conserv.* **15**, 61–72 (2012).
- 557 29. R. Percino-Daniel, E. Recuero, E. Vázquez-Domínguez, K. R. Zamudio, G. Parra-Olea,  
558 All grown-up and nowhere to go: Paedomorphosis and local adaptation in *Ambystoma*  
559 salamanders in the Cuenca Oriental of Mexico. *Biol. J. Linn. Soc.* **118**, 582–597 (2016).
- 560 30. R. A. Brandon, Hybridization between the Mexican salamanders *Ambystoma dumerilii*  
561 and *Ambystoma mexicanum* under laboratory conditions. *Herpetologica* **28**, 199–207  
562 (1972).

- 563 31. R. A. Brandon, Interspecific hybridization among Mexican and United States salamanders  
564 of the genus *Ambystoma* under laboratory conditions. *Herpetologica* **33**, 133–152 (1977).
- 565 32. S. Krebs, R. Brandon, A new species of salamander (family Ambystomatidae) from  
566 Michoacan, Mexico. *Herpetologica* **40**, 238–245 (1984).
- 567 33. J. B. Armstrong, G. M. Malacinski, *Developmental Biology of the Axolotl* (Oxford  
568 University Press, 1989).
- 569 34. L. L. Bailey, T. R. Simons, K. H. Pollock, Estimating site occupancy and species  
570 detection probability parameters for terrestrial salamanders. *Ecol. Appl.* **14**, 692–702  
571 (2004).
- 572 35. E. M. O’Neill, *et al.*, Parallel tagged amplicon sequencing reveals major lineages and  
573 phylogenetic structure in the North American tiger salamander (*Ambystoma tigrinum*)  
574 species complex. *Mol. Ecol.* **22**, 111–129 (2013).
- 575 36. T. Jombart, S. Devillard, F. Balloux, Discriminant analysis of principal components: A  
576 new method for the analysis of genetically structured populations. *BMC Genet.* **11**, 94  
577 (2010).
- 578 37. H. B. Shaffer, G. B. Pauly, J. C. Oliver, P. C. Trenham, The molecular phylogenetics of  
579 endangerment: Cryptic variation and historical phylogeography of the California tiger  
580 salamander, *Ambystoma californiense*. *Mol. Ecol.* **13**, 3033–3049 (2004).
- 581 38. J. W. Petranka, *Salamanders of the United States and Canada* (Smithsonian Books, 2010).
- 582 39. , AmphibiaWeb. *Univ. California, Berkeley, CA* (2020) (May 11, 2020).
- 583 40. D. H. Huson, SplitsTree: Analyzing and visualizing evolutionary data. *Bioinformatics* **14**,  
584 68–73 (1998).
- 585 41. J. Chifman, L. Kubatko, Quartet inference from SNP data under the coalescent model.



- 586 *Bioinformatics* **30**, 3317–3324 (2014).
- 587 42. A. J. Drummond, A. Rambaut, BEAST: Bayesian evolutionary analysis by sampling trees.  
588 *BMC Evol. Biol.* **7**, 214 (2007).
- 589 43. A. Stamatakis, RAxML version 8: A tool for phylogenetic analysis and post-analysis of  
590 large phylogenies. *Bioinformatics* **30**, 1312–1313 (2014).
- 591 44. A. A. Dugès, *Description d'un axolotl des montagnes de las cruces (Amblystoma [sic]*  
592 *altamirani, A. Dugès)* (Imprimerie du Ministère de “Fomento,” 1895).
- 593 45. E. H. Taylor, Herpetological novelties from Mexico. *Univ. Kansas Sci. Bull.* **29**, 343–358  
594 (1943).
- 595 46. E. Dunn, A new genus of salamanders from Mexico. *Proc. New Engl. Zool. Club* **10**, 85–  
596 86 (1928).
- 597 47. E. H. Taylor, A new ambystomid salamander from the Plateau Region of Mexico. *Univ.*  
598 *Kansas Sci. Bull.* **30**, 57–61 (1944).
- 599 48. A. A. Dugès, Una nueva especie de ajolote de la Laguna de Patzcuaro. *La Nat.* **1**, 241–244  
600 (1870).
- 601 49. J. Dixon, A new species of salamander of the genus *Ambystoma* from Jalisco, Mexico.  
602 *Copeia* **1**, 99–101 (1963).
- 603 50. G. Shaw, F. Nodder, *The Naturalist's Miscellany; or Coloured Figures of Natural Objects*  
604 *Drawn and Described Immediately from Nature*, 9th Ed. (Nodder & Co., 1798).
- 605 51. A. A. Dugès, Erpetología del valle de México. *La Nat.* **2**, 97–146 (1888).
- 606 52. J. R. Johnson, R. C. Thomson, S. J. Micheletti, H. B. Shaffer, The origin of tiger  
607 salamander (*Ambystoma tigrinum*) populations in California, Oregon, and Nevada:  
608 Introductions or relicts? *Conserv. Genet.* **12**, 355–370 (2011).

- 609 53. E. H. Taylor, Two new ambystomid salamanders from Chihuahua. *Copeia* **3**, 143–146  
610 (1941).
- 611 54. R. Webb, Observations on tiger salamanders (*Ambystoma tigrinum* complex, family  
612 Ambystomatidae) in Mexico with description of a new species. *Bull. Maryl. Herpetol.*  
613 *Soc.* **40**, 122–143 (2004).
- 614 55. R. A. Brandon, Spontaneous and induced metamorphosis of *Ambystoma dumerilii*  
615 (Dugès), a paedogenetic Mexican salamander, under laboratory conditions. *Herpetologica*  
616 **32**, 429–438 (1976).
- 617 56. H. M. Wilbur, J. P. Collins, Ecological aspects of amphibian metamorphosis: Nonnormal  
618 distributions of competitive ability reflect selection for facultative metamorphosis. *Science*  
619 **182**, 1305–1314 (1973).
- 620 57. R. M. Bonett, M. A. Steffen, S. M. Lambert, J. J. Wiens, P. T. Chippindale, Evolution of  
621 paedomorphosis in plethodontid salamanders: Ecological correlates and re-evolution of  
622 metamorphosis. *Evolution* **68**, 466–482 (2014).
- 623 58. C. R. Marshall, E. C. Raff, R. A. Raff, Dollo’s law and the death and resurrection of  
624 genes. *Proc. Natl. Acad. Sci. USA* **91**, 12283–12287 (1994).
- 625 59. M. J. West-Eberhard, Phenotypic Plasticity and the Origins of Diversity. *Annu. Rev. Ecol.*  
626 *Syst.* **20**, 249–278 (1989).
- 627 60. M. J. West-Eberhard, Alternative adaptations, speciation, and phylogeny (A Review).  
628 *Proc. Natl. Acad. Sci. USA* **83**, 1388–92 (1986).
- 629 61. B. M. Fitzpatrick, Underappreciated consequences of phenotypic plasticity for ecological  
630 speciation. *Int. J. Ecol.* **2012**, 1–12 (2012).
- 631 62. M. Denoël, P. Poncin, J.-C. Ruwet, Sexual compatibility between two heterochronic

- 632 morphs in the Alpine newt, *Triturus alpestris*. *Anim. Behav.* **62**, 559–566 (2001).
- 633 63. J. D. Krenz, P. A. Verrell, Integrity in the midst of sympatry: Does sexual incompatibility  
634 facilitate the coexistence of metamorphic and paedomorphic mole salamanders  
635 (*Ambystoma talpoideum*)? *J. Zool.* **258**, S0952836902001589 (2002).
- 636 64. H. H. Whiteman, J. D. Krenz, R. D. Semlitsch, Intermorph breeding and the potential for  
637 reproductive isolation in polymorphic mole salamanders (*Ambystoma talpoideum*). *Behav.*  
638 *Ecol. Sociobiol.* **60**, 52–61 (2006).
- 639 65. H. Whiteman, J. Gutrich, R. Moorman, Courtship behavior in a polymorphic population of  
640 the tiger salamander, *Ambystoma tigrinum nebulosum*. *J. Herpetol.* **33**, 348–351 (1999).
- 641 66. R. . Howard, R. . Moorman, H. . Whiteman, Differential effects of mate competition and  
642 mate choice on eastern tiger salamanders. *Anim. Behav.* **53**, 1345–1356 (1997).
- 643 67. D. H. Bos, R. N. Williams, D. Gopurenko, Z. Bulut, J. A. DeWoody, Condition-dependent  
644 mate choice and a reproductive disadvantage for MHC-divergent male tiger salamanders.  
645 *Mol. Ecol.* **18**, 3307–3315 (2009).
- 646 68. C. E. Nelson, R. R. Humphrey, Artificial interspecific hybridization among *Ambystoma*.  
647 *Herpetologica* **28**, 27–32 (1972).
- 648 69. J. M. Velasco, Anotaciones y observaciones al trabajo del Sr. D. A. Weismann sobre la  
649 transformación del ajolote Mexicano en *Amblistoma*. *La Nat.* **5**, 58–84 (1880).
- 650 70. H. M. Smith, The Mexican axolotl: Some misconceptions and problems. *Bioscience* **19**,  
651 593–615 (1969).
- 652 71. A. G. E. Mathiron, J.-P. Lena, S. Baouch, M. Denoël, The ‘male escape hypothesis’: Sex-  
653 biased metamorphosis in response to climatic drivers in a facultatively paedomorphic  
654 amphibian. *Proc. R. Soc. B Biol. Sci.* **284**, 20170176 (2017).

- 655 72. C. L. Morjan, L. H. Rieseberg, How species evolve collectively: Implications of gene flow  
656 and selection for the spread of advantageous alleles. *Mol. Ecol.* **13**, 1341–1356 (2004).
- 657 73. J. L. Tamayo, R. C. West, “The hydrography of middle America” in *Handbook of Middle*  
658 *American Indians*, R. Wauchope, R. C. West, Eds. (University of Texas Press, 1964), pp.  
659 84–121.
- 660 74. G. R. Hopkins, E. D. Brodie, Occurrence of amphibians in saline habitats: A review and  
661 evolutionary perspective. *Herpetol. Monogr.* **29**, 1–27 (2015).
- 662 75. K. De Queiroz, Species concepts and species delimitation. *Syst. Biol.* **56**, 879–886 (2007).
- 663 76. P. M. Hime, *et al.*, Phylogenomics reveals ancient gene tree discordance in the amphibian  
664 tree of life. *Syst. Biol.* (2020) <https://doi.org/10.1093/sysbio/syaa034> (May 12, 2020).
- 665 77. G. Parra-Olea, *et al.*, Conservation genetics of threatened Mexican axolotls (*Ambystoma*).  
666 *Anim. Conserv.* **15**, 61–72 (2012).
- 667 78. J. Koster, S. Rahmann, Snakemake: A scalable bioinformatics workflow engine.  
668 *Bioinformatics* **28**, 2520–2522 (2012).
- 669 79. A. M. Bolger, M. Lohse, B. Usadel, Trimmomatic: A flexible trimmer for Illumina  
670 sequence data. *Bioinformatics* **30**, 2114–2120 (2014).
- 671 80. H. Li, A statistical framework for SNP calling, mutation discovery, association mapping  
672 and population genetical parameter estimation from sequencing data. *Bioinformatics* **27**,  
673 2987–2993 (2011).
- 674 81. E. Garrison, G. Marth, Haplotype-based variant detection from short-read sequencing.  
675 *arXiv* **1207.3907** (2012).
- 676 82. P. Danecek, *et al.*, The variant call format and VCFtools. *Bioinformatics* **27**, 2156–2158  
677 (2011).

- 678 83. M. Martin, *et al.*, WhatsHap: Fast and accurate read-based phasing. *bioRxiv* **10.1101/08**  
679 (2016).
- 680 84. K. Katoh, D. M. Standley, MAFFT multiple sequence alignment software version 7:  
681 Improvements in performance and usability. *Mol. Biol. Evol.* **30**, 772–780 (2013).
- 682 85. A. J. Page, *et al.*, SNP-sites: Rapid efficient extraction of SNPs from multi-FASTA  
683 alignments. *Microb. genomics* **2**, e000056 (2016).
- 684 86. R. C. Team, R: a language and environment for statistical computing (2012).
- 685 87. T. Jombart, adegenet: A R package for the multivariate analysis of genetic markers.  
686 *Bioinformatics* **24**, 1403–1405 (2008).
- 687 88. T. Jombart, C. Collins, A tutorial for discriminant analysis of principal components  
688 (DAPC) using adegenet 2.0.0. *adegenet.r-forge.r-project.org* (2015) (May 30, 2019).
- 689 89. J. K. J. Pritchard, M. Stephens, P. Donnelly, Inference of population structure using  
690 multilocus genotype data. *Genetics* **155**, 945–959 (2000).
- 691 90. N. M. Kopelman, J. Mayzel, M. Jakobsson, N. A. Rosenberg, I. Mayrose, Clumpak: A  
692 program for identifying clustering modes and packaging population structure inferences  
693 across K. *Mol. Ecol. Resour.* **15**, 1179–1191 (2015).
- 694 91. G. Evanno, S. Regnaut, J. Goudet, Detecting the number of clusters of individuals using  
695 the software structure: A simulation study. *Mol. Ecol.* **14**, 2611–2620 (2005).
- 696 92. P. Beerli, M. Palczewski, Unified framework to evaluate panmixia and migration direction  
697 among multiple sampling locations. *Genetics* **185**, 313–326 (2010).
- 698 93. D. H. Huson, D. Bryant, Application of phylogenetic networks in evolutionary studies.  
699 *Mol. Biol. Evol.* **23**, 254–267 (2006).
- 700 94. D. Bryant, V. Moulton, Neighbor-Net: An agglomerative method for the construction of

- 701 phylogenetic networks. *Mol. Biol. Evol.* **21**, 255–265 (2003).
- 702 95. A. Rambaut, A. Drummond, D. Xie, G. Baele, M. Suchard, Tracer v1.7 (2018).
- 703 96. J. Sukumaran, M. Holder, DendroPy: A Python library for phylogenetic computing.  
704 *Bioinformatics* **26**, 1569–1571 (2010).
- 705 97. R. Lanfear, B. Calcott, S. Y. W. Ho, S. Guindon, PartitionFinder: Combined selection of  
706 partitioning schemes and substitution models for phylogenetic analyses. *Mol Biol Evol* **29**,  
707 1695–1701 (2012).
- 708 98. M. A. Miller, W. Pfeiffer, T. Schwartz, Creating the CIPRES Science Gateway for  
709 inference of large phylogenetic trees in *2010 Gateway Computing Environments*  
710 *Workshop (GCE)*, (IEEE, 2010), pp. 1–8.
- 711 99. D. Swofford, PAUP 4.0 b10: Phylogenetic analysis using parsimony (2002) (December  
712 21, 2013).
- 713 100. A. Rambaut, FigTree, a graphical viewer of phylogenetic trees (2007) (May 8, 2014).
- 714
