1 Classification: Biological Sciences; Evolution  
2 Geography is more important than life history in the recent  
3 diversification of the tiger salamander complex

4  
5 Kathryn M. Everson<sup>a,1</sup>, Levi N. Gray<sup>a,1</sup>, Angela G. Jones<sup>a</sup>, Nicolette M. Lawrence<sup>a</sup>, Mary E.  
6 Foley<sup>a</sup>, Kelly L. Sovacool<sup>a,b</sup>, Justin D. Kratovil<sup>a,c</sup>, Scott Hotaling<sup>a,d</sup>, Paul M. Hime<sup>a,e</sup>, Andrew  
7 Storfer<sup>d</sup>, Gabriela Parra-Olea<sup>f</sup>, Ruth Percino-Daniel<sup>g</sup>, X. Aguilar-Miguel<sup>h</sup>, Eric M. O'Neill<sup>a</sup>, Luis  
8 Zambrano<sup>f</sup>, H. Bradley Shaffer<sup>i</sup>, David W. Weisrock<sup>a,2</sup>

9  
10 <sup>a</sup>Department of Biology, University of Kentucky, Lexington, KY 40506 USA

11 <sup>b</sup>Department of Computational Medicine & Bioinformatics, University of Michigan, Ann Arbor,  
12 MI 48109 USA

13 <sup>c</sup>Ecology and Evolutionary Biology Department, University of Connecticut, Storrs, CT 06269  
14 USA

15 <sup>d</sup>School of Biological Sciences, Washington State University, Pullman, WA 99164 USA

16 <sup>e</sup>Biodiversity Institute, University of Kansas, Lawrence, KS 66045 USA

17 <sup>f</sup>Departamento de Zoología, Instituto de Biología, Universidad Nacional Autónoma de México,  
18 Ciudad Universitaria, Coyoacán, Ciudad de México 04510, México

19 <sup>g</sup>Departamento de Ecología Evolutiva, Instituto de Ecología, Universidad Nacional Autónoma  
20 de México, Ciudad Universitaria, Coyoacán, Ciudad de México 04510, México

21 <sup>h</sup>CIRB, Facultad de Ciencias, Universidad Autónoma del Estado de México, Toluca 50000, Edo.  
22 de México, México

23 <sup>1</sup>Department of Ecology and Evolutionary Biology, and La Kretz Center for California

24 Conservation Science, University of California, Los Angeles, CA 90095 USA

25

26 <sup>1</sup> K.M.E. and L.N.G. contributed equally to this work

27 <sup>2</sup>To whom correspondence may be addressed. Email: [david.weisrock@uky.edu](mailto:david.weisrock@uky.edu)

28

29 **ABSTRACT**

30         The North American tiger salamander species complex, including its best-known species,  
31 the Mexican axolotl, has long been a source of biological fascination. The complex exhibits a  
32 wide range of variation in developmental life history strategies, including populations and  
33 individuals that undergo metamorphosis, those able to forego metamorphosis and retain a larval,  
34 aquatic lifestyle (i.e., paedomorphosis), and those that do both. This life history variation has  
35 been assumed to lead to reproductive isolation and speciation, but the degree to which it has  
36 shaped population- and species-level divergence is poorly understood. Using a large multi-locus  
37 dataset from hundreds of samples across North America, we identified genetic clusters across the  
38 geographic range of the tiger salamander complex. These clusters often contain a mixture of  
39 paedomorphic and metamorphic taxa, indicating that geographic isolation has played a larger  
40 role in lineage divergence than paedomorphosis in this system. This conclusion is bolstered by  
41 geography-informed analyses indicating no effect of life history strategy on population genetic  
42 differentiation and by model-based analyses demonstrating gene flow between adjacent  
43 metamorphic and paedomorphic populations. This fine-scale genetic perspective on life-history  
44 variation establishes a framework for understanding how plasticity, local adaptation, and gene  
45 flow contribute to lineage divergence. Many members of the tiger salamander complex are  
46 endangered, and the Mexican axolotl is an important model system in regenerative and  
47 biomedical research. Our results chart a course for more informed use of these taxa in  
48 experimental, ecological, and conservation research.

49

50 **Keywords:** *Ambystoma*, life history, phylogenetics, population genomics, salamanders

51

52 **SIGNIFICANCE STATEMENT**

53           Population structure and speciation are shaped by a combination of biotic and abiotic  
54 factors. The tiger salamander complex has been considered to be a key group where life history  
55 variation has led to a rapid rate of speciation, driven in large part by the evolution of obligate  
56 paedomorphosis—a condition where adults maintain an aquatic, larval phenotype. Using a large  
57 multi-locus dataset, we present evidence of gene flow between taxa with different life history  
58 strategies, suggesting that obligate paedomorphosis is not a strong driver of speciation in the  
59 tiger salamander complex. Many of these nominal taxa are listed as critically endangered, and  
60 our genetic results provide information and guidance that will be useful for their conservation.

61

62

## 63 **Introduction**

64 Life history—the complement of traits affecting survival and reproduction over an  
65 organism’s lifetime—affects ecology and dispersal, and therefore plays a potentially important  
66 role in shaping population structure and speciation (1, 2). The Mexican axolotl (*Ambystoma*  
67 *mexicanum*; hereafter, “axolotl”) and related salamander species of the North American  
68 *Ambystoma tigrinum* complex (Table 1) display enormous life history variation, particularly with  
69 respect to the completion of metamorphosis (3). Some species are considered obligate  
70 paedomorphs, where sexually mature adults retain a larval, aquatic body plan that includes  
71 external gills and an enlarged tail fin (4). Others are considered obligate metamorphs,  
72 transforming from aquatic larvae to terrestrial juveniles, eventually returning to the water to  
73 breed as adults. Most populations are facultative, transforming under certain genetic and/or  
74 environmental conditions (5–8). This lability in life history is believed to have played an  
75 important role in the diversification of the *A. tigrinum* complex, particularly in the Trans-  
76 Mexican Volcanic Belt (TMVB) region, where several paedomorphic species, including the  
77 axolotl, are currently recognized (9–11). Obligate paedomorphosis is estimated to have evolved  
78 in this region multiple times (11–13) in association with relatively large, permanent bodies of  
79 water. Presumably, restricted gene flow between these isolated, paedomorphic populations led to  
80 speciation as well as morphological adaptations to the aquatic lifestyle (14).

81 The term “species complex,” while not a formal taxonomic category, is often used to  
82 describe groups of closely related lineages early in the divergence process. The tiger salamander  
83 species complex has been highlighted as a potentially valuable example of such a recent  
84 radiation (15) that could provide insight into the early mechanisms initiating and/or maintaining  
85 diversity (16–21). However, species complexes pose a number of challenges: phenotypic

86 differences among lineages may be subtle or absent (i.e., cryptic species), ancestral  
87 polymorphisms may lead to incomplete lineage sorting that confounds molecular systematic  
88 studies, and reproductive barriers may be incomplete. The reliance on phenotype for species  
89 diagnosis in the *A. tigrinum* complex may require particular scrutiny, as several phenotypic traits,  
90 including developmental state and adult color pattern, can be plastic and highly variable (22–24).  
91 Given these challenges, fundamental questions remain concerning the reality of component  
92 lineages within the tiger salamander complex, calling into question the current taxonomy as an  
93 accurate reflection of its underlying evolutionary history.

94 Previous research has produced mixed results regarding levels of genetic differentiation  
95 among lineages in the *A. tigrinum* complex, as well as the relative importance of paedomorphosis  
96 as a driver of diversification. While population- and species-level structure is evident, an  
97 important theme emerging across multiple studies has been that reproductive barriers are porous  
98 (11, 25, 26). Shaffer and McKnight (11) noted “the striking lack of differentiation among the 14  
99 species of the tiger salamander complex” (p. 425). Some studies have found an elevated degree  
100 of population structure among paedomorphic populations relative to metamorphic populations  
101 (12, 27). However, others have shown a lack of effect of paedomorphosis on population genetic  
102 differentiation (28), and demonstrated that paedomorphic taxa and neighboring metamorphic  
103 populations interbreed (29). Furthermore, crosses between metamorphic and paedomorphic taxa  
104 can produce viable hybrid offspring under laboratory conditions (30, 31).

105 To understand the processes underlying diversification in the tiger salamander complex,  
106 an important first step must be a range-wide assessment of population structure and the  
107 clarification of population- and species-level boundaries. With this groundwork, insights into the  
108 role of paedomorphosis and diversification can be addressed. For a study system of this

109 geographic and taxonomic scale, robust inference of population structure requires information  
110 from multiple genes combined with thorough range-wide sampling. To meet these criteria, we  
111 expand on a large multi-locus dataset containing 95 nuclear loci for 93 individuals (32), to  
112 produce a data matrix for 347 individuals across the full geographic range of tiger salamanders  
113 (Fig. S1). Given the complex and somewhat checkered history of the group's taxonomy, we  
114 focus on a naïve approach, performing population structure analyses without *a priori*  
115 identification of taxa to resolve geographic genetic clusters and characterize patterns of  
116 admixture. We also overlay these results on the existing taxonomy to explore the correspondence  
117 between current taxonomy and genetic differentiation. We then use these data for a phylogenetic  
118 analysis to provide an updated working hypothesis for the evolution of the group. Finally, we test  
119 the hypothesis that life history evolution has driven speciation in the tiger salamander complex,  
120 particularly through the assumed isolation of paedomorphic species. In light of the life history  
121 variation in this species complex, we use natural history information to place taxa into one of  
122 five categories (Table 1) reflecting their propensity to metamorphose, then use model-based tests  
123 of migration to ask whether paedomorphic populations (categories 4 and 5) exhibit greater levels  
124 of genetic differentiation relative to those that regularly metamorphose (categories 1-3).

125

## 126 **RESULTS AND DISCUSSION**

### 127 *Identification of genetic lineages and phylogenetic relationships*

128 A principal components analysis (PCA) and a discriminant analysis of principal  
129 components (DAPC; 33) both recovered *Ambystoma californiense* Gray 1853 as genetically  
130 distinct from all other tiger salamanders (Fig. 1A, S2, S3), consistent with previous work (e.g.,  
131 11, 34). Given that *A. californiense* is the only obligate metamorph in the complex (life history

132 category 1; Table 1) and is genetically divergent and geographically isolated from all other tiger  
133 salamanders evaluated in this study, we focus the remaining analyses on the other members of  
134 the complex. After removing *A. californiense* from the dataset, DAPC supported the recognition  
135 of three primary genetic clusters: U.S. (including samples from southern Canada), northwestern  
136 Mexico (primarily the Sierra Madre Occidental), and the central Mexican highlands (Fig. 1B,  
137 S4). A PCA of these data produced similar clustering results, with ordination patterns largely  
138 mirroring geographic sampling (Fig. S5). For a further discussion of the taxonomic implications  
139 of our results, see the Supplementary Material.

140         Within central Mexico, we identified  $K = 7$  as the best-fit number of clusters in both  
141 DAPC and STRUCTURE analyses (Figs. 2A, S6). However, several of these clusters were only  
142 represented as a small proportion of genetic assignments, rather than as meaningful groups of  
143 individuals, and visual inspection at multiple levels of  $K$  revealed four clear geographic clusters  
144 (hereafter referred to as CM1-CM4) that captured the primary patterns of genetic differentiation  
145 and admixture across this region (Figs. 2A, S7-S8). Network analysis (35) also recovered groups  
146 that generally correspond to CM1-CM4, but with evidence of many reticulations (Fig. 3). This  
147 starburst-like pattern indicates the presence of conflicting topologies within the dataset (35),  
148 which can be caused by biological processes including recent diversification with incomplete  
149 lineage sorting, current or evolutionarily recent gene flow, or both. Phylogenetic analyses (36–  
150 38) recovered monophyletic CM1, CM2, and CM4 clusters (see below for discussion of CM3),  
151 but often with low statistical support (Fig. 3).

152         Based on type locality and range information, the CM1 cluster includes three stream-  
153 breeding and facultatively paedomorphic taxa: *Ambystoma altamirani* Dugès 1895 (39), *A.*  
154 *leorae* (Taylor 1943) (40), and *A. rivulare* (Taylor 1940) (9). Subsequent analyses of this cluster



155 identified two admixed populations associated with eastern and western portions of its  
156 geographic distribution (Figs. 2B, S9). Phylogenetically, CM1 was monophyletic and sister to all  
157 other central Mexican groups (Fig. 3).

158 CM2 grouped *A. lermaense* (Taylor 1940) (9) with samples corresponding to the type  
159 localities and range of *A. bombypellum* Taylor 1940 (9) and *A. granulorum* Taylor 1944 (41).  
160 There was no evidence for genetic isolation among any of these three taxa (Figs. 2C, S9).

161 Within CM3, population-genetic analyses first separated samples of *A. ordinarium* Taylor  
162 1940 (5) from the rest (with no admixture detected; Figs. 2D, S9). Other samples clustered into  
163 northern and southern groups with some admixture in intermediate localities. The more southern  
164 cluster includes two obligately paedomorphic (category 5) taxa, *A. andersoni* Krebs & Brandon  
165 1984 (42) and *A. dumerilii* (Dugès 1870) (43), endemic to Lakes Zacapú and Pátzcuaro,  
166 respectively. The samples from other CM3 localities likely represent what are currently  
167 classified as *A. amblycephalum* Taylor 1940 (9) and *A. flavipiperatum* Dixon 1963 (44).

168 CM4 included the axolotl, *A. mexicanum* (Shaw & Nodder 1798) (45), and *A. taylori*  
169 Brandon et al. 1981 (10)—both category 4 paedomorphs—as well as samples assigned to the  
170 facultatively paedomorphic (category 3) *A. velasci* (Duges 1888) (46). Subsequent DAPC and  
171 STRUCTURE analyses of CM4 placed all but one *A. mexicanum* individual sampled from Lakes  
172 Xochimilco and Chapultepec (i.e., the remaining habitats of the axolotl) in a distinct cluster (Fig.  
173 2E, S9), with evidence of some admixture in samples to the northwest of Mexico City.

174 Within the U.S. and Canada (excluding *A. californiense*), DAPC and STRUCTURE  
175 identified three genetic clusters ( $K = 3$ ), with clear signs of admixed contact zones (Figs. 2F,  
176 S10, S11). Geographically, these clusters are associated with the eastern U.S., the central +  
177 western U.S., and the southwestern U.S. + Rocky Mountains (hereafter, we refer to the latter two

178 groups as central U.S. and Rocky Mountain U.S., respectively). Populations in the eastern U.S.  
179 are assignable to *A. tigrinum* Green 1825, while central U.S. and Rocky Mountain U.S.  
180 populations to *A. mavortium* Baird 1850. Phylogenetic analyses corroborated these results, albeit  
181 with extensive reticulations among clusters in the phylogenetic network (Fig. 3) and mixed  
182 support for species-tree relationships among the three major groups (Fig. 3 vs. Fig. S13). Further  
183 exploration of population structure within each of the three U.S. clusters recovered additional  
184 patterns of differentiation (Figs. S10, S11), including northern and southern clusters in the  
185 eastern U.S. and central U.S., and an allopatric cluster restricted to the Pacific Northwest.  
186 Overall, our U.S. results are similar to mtDNA-based results from previous studies, which  
187 identified haplotype clades associated with the eastern U.S., Great Plains and Rocky Mountains,  
188 and the Pacific Northwest (11, 47).

189 All analyses of the northern Mexico group identified two genetic clusters ( $K = 2$ ; Figs.  
190 2G, S12). The northern cluster corresponds to *A. rosaceum* Taylor 1941 (48), while the southern  
191 cluster is likely *A. silvense* Webb 2004 (49, see also 50). Phylogenetic analyses recovered each  
192 of these two northern Mexico clusters as monophyletic, but not sister to one another, and with  
193 few reticulate nodes in the phylogenetic network (Fig. 3, S13).

194

195 *Does paedomorphosis lead to increased genetic differentiation?*

196 As a first step in addressing this question, we used Bayesian modeling to test for genetic  
197 isolation of paedomorphic taxa (i.e., species scored as life history category 4 or 5 in Table 1). We  
198 tested for gene flow between paedomorphs—*A. andersoni* and *A. dumerilii* in CM3, and *A.*  
199 *mexicanum* and *A. taylori* in CM4—and their surrounding facultatively paedomorphic  
200 populations. For both CM3 and CM4, the top-ranking models included migration among all

201 populations, regardless of their degree of paedomorphosis (Fig. 4). Alternative models of no  
202 migration or restricted migration (Fig. S14) were rejected with decisive Bayes factors (Table S3).  
203 In CM3, migration rates entering the *A. dumerilii* population were higher than those leaving that  
204 population, while migration rates entering and exiting *A. andersoni* were approximately equal.  
205 In CM4, migration rates exiting the *A. mexicanum* population were much higher than those  
206 entering the population while migration rates entering and exiting *A. taylori* were approximately  
207 equal (Fig. 4, Table S4). An important caveat to our migration and population structure analyses  
208 is that divergence time is not included as a model parameter, which prevents distinguishing  
209 between historical and contemporary gene flow. Thus, our ability to differentiate ongoing from  
210 historical gene flow in these tests is limited.

211 We also assessed whether a paedomorphic life history is associated with greater  
212 population genetic differentiation (calculated here as  $\Phi_{ST}$ ), which would be expected if  
213 paedomorphosis is an important reproductive barrier (12). Plots of  $\Phi_{ST}$  against geographic  
214 distance showed that comparisons involving paedomorphic populations were largely overlapping  
215 with those based on facultative-facultative comparisons, with no difference in slope or y-  
216 intercept (Fig. 4). In both CM3 and CM4, partial Mantel tests found no significant correlation  
217 between life history and pairwise  $\Phi_{ST}$  after correcting for geographic distance (Fig. 4).

218

### 219 *The influence of life history on diversification*

220 A popular perspective on diversification in this species complex is that paedomorphosis  
221 promotes reproductive isolation and, ultimately, speciation (10, 11). An important theme of our  
222 results is that taxa with different life history strategies commonly cluster together by geography  
223 in population genetic and phylogeographic analyses (Figs. 2, 3). Furthermore, genetic

224 differentiation is not significantly greater for paedomorphic populations, relative to facultative  
225 populations, and there has been substantial gene flow among populations with different life  
226 history strategies (Fig. 4). Thus, the evolution of life history extremes does not appear to be the  
227 main driver of speciation in the tiger salamander complex.

228         It is also worth noting that facultative paedomorphosis is the inferred ancestral condition  
229 (8) and nearly all extant lineages in the *Ambystoma tigrinum* complex are capable of  
230 metamorphosis, either in the wild or in the lab. Only *A. dumerilii* is not known to survive  
231 metamorphosis, even under laboratory conditions (51). That only one described taxon in the  
232 complex is demonstrably fixed for paedomorphosis raises several questions: Are the rest of the  
233 primarily paedomorphic populations *en route* to fixation, rather than actually fixed? Have  
234 lineages fixed for paedomorphosis gone extinct? Do facultative populations fluctuate in  
235 paedomorph frequency over time, depending on environmental and/or demographic conditions  
236 (5)? Do transforming and non-transforming individuals interbreed in nature? While these remain  
237 open questions, below we provide some relevant context for exploration and future research.

238         Theory predicts that paedomorphosis in salamanders is most likely to become fixed in a  
239 population when ecological conditions are favorable in the larval, aquatic environment but  
240 unfavorable on land (e.g., when terrestrial habitats are arid or resource-limited) (12, 52, 53).  
241 However, it is not known how long fixed populations persist over evolutionary time; obligate  
242 paedomorphic lineages may have arisen and gone extinct multiple times over tiger salamander  
243 evolutionary history (54). One situation that would result in complete speciation is if  
244 paedomorphosis became fixed in the population and migration with surrounding facultatively  
245 paedomorphic populations ceased due to strong assortative mating and/or selection against  
246 hybrids (55–57). However, assortative mating within life history morphs has not been

247 demonstrated in other salamanders (58–60) and different tiger salamander morphs can interbreed  
248 (61). In fact, the only known instance of positive assortative mating in *A. tigrinum* is associated  
249 with tail length (62, 63), which might favor metamorphosed males as paedomorphic individuals  
250 can have relatively short tails (42). The evidence for selection against intermorph offspring is  
251 also scarce. Captive breeding using artificial fertilization has produced *A. mexicanum* x *A.*  
252 *tigrinum*, *A. dumerilii* x *A. tigrinum*, *A. andersoni* x *A. tigrinum*, and *A. dumerilii* x *A. rivulare*  
253 hybrids (7, 31, 64–66). This suggests that postzygotic barriers are weak, although the extent to  
254 which divergent lineages would interbreed in the wild remains a key question in need of  
255 investigation.

256         If biological barriers to reproduction are limited or absent, there are several potential  
257 mechanisms by which dispersal could mediate gene flow between paedomorphic and  
258 metamorphic populations. First, metamorphosed individuals from facultatively paedomorphic  
259 populations could move into bodies of water containing paedomorphic populations. Our  
260 demographic analyses support this scenario, as they recovered immigration from facultative into  
261 paedomorphic populations (Fig. 4). However, demographic analyses also estimated emigration  
262 out of paedomorphic populations; thus, “obligate” paedomorphs might also occasionally  
263 metamorphose and disperse. Occasional metamorphosis has been documented in several  
264 putatively paedomorphic populations (9, 10, 42, 67–69), and may be more prevalent than  
265 currently recognized because rare transformed individuals in nature are virtually impossible to  
266 verify (70). Importantly, even a low frequency of transformed adults is likely sufficient to  
267 maintain evolutionary cohesion with surrounding populations (10, 29, 71). Alternatively, the  
268 dispersal of paedomorphs might be human-mediated; this could partially explain the elevated  
269 emigration rates we observed in the axolotl (Fig. 4). Axolotls are known to be sold in local

270 markets as food, bait, or aquarium pets, and are sometimes moved from one area of central  
271 Mexico to another (72). Finally, gene flow may not necessarily be mediated across a terrestrial  
272 environment; genetic connectivity could also be maintained if populations have been forced into  
273 contact by water level fluctuations in the groundwater system of a region. The dynamic  
274 lacustrine history of the Cuenca Oriental (73), for instance, suggests that isolation of some  
275 paedomorphic populations has been punctuated by broader aquatic connections over short  
276 geological time scales, potentially facilitating gene flow. Collectively, these mechanisms may  
277 explain the maintenance of geographic genetic groups, now or in the evolutionarily recent past,  
278 containing a range of life histories.

279         The genetic cohesion we detected across wide swaths of the TMVB is particularly  
280 striking given other evidence for local adaptation in this region. This scenario is perhaps best  
281 exemplified in the Cuenca Oriental (Fig. 2E), where some lakes contain paedomorphic  
282 salamanders adapted to saline conditions, a very rare trait among amphibians (74). At one site,  
283 the saline Lake Alchichica, the population is currently considered a distinct species (*A. taylori*)  
284 (10). However, our results indicate that *A. taylori* is not genetically distinct from surrounding,  
285 putatively non-saline-adapted populations, a result consistent with a previous microsatellite-  
286 based study that found significant gene flow to and from *A. taylori* (29). While we cannot rule  
287 out the potential for localized selection and adaptation in the *A. taylori* genome, our results  
288 highlight that even populations adapted to aquatic conditions intolerable to most other  
289 *Ambystoma* have not reached a level of isolation identifying them as an independent evolutionary  
290 lineage (75).

291

292 *Comparisons to previous work*

293           This study included extensive geographic sampling of the tiger salamander complex,  
294 which provided a broad spatial context to more fully understand patterns of genetic variation.  
295 However, it is important to consider the possibility that our data are simply not sensitive enough  
296 to detect genetic differentiation associated with lineage divergence on an extremely recent time  
297 scale. The common ancestor of *A. californiense* and the remainder of the species complex dates  
298 to approximately five million years (11, 34), and phylogenomic data indicate that speciation  
299 across the remaining tiger salamander lineages occurred within the last one million years (76).  
300 Such recent timing renders lineage boundaries difficult to detect (15). Our markers, developed  
301 from transcriptomic resources (32), may not have an overall substitution rate sufficient to detect  
302 such subtle genetic differentiation. We recommend that future research uses a larger genomic  
303 dataset or faster-evolving loci with particular focus on the sampling of paedomorphs in this  
304 system. To this point, perhaps the strongest evidence for the genetic divergence of paedomorphic  
305 populations comes from past microsatellite-based work indicating the genetic distinctiveness of  
306 *A. andersoni* and *A. mexicanum* from a select set of populations across central Mexico (27) and  
307 the genetic distinctiveness of *A. taylori* from neighboring populations in the Cuenca Oriental  
308 (29). Both of these studies recovered signatures of gene flow, but identified greater overall  
309 population structure compared to this study, which could be due to numerous factors, including a  
310 faster microsatellite mutation rate and more limited locality sampling.

311

312 **CONCLUSIONS**

313           The extent to which populations within the tiger salamander complex exhibit phenotypic  
314 plasticity in life history traits is remarkable and is believed to have played a role in the rapid

315 accumulation of lineages observed in the highlands of central Mexico (11, 57). While our results  
316 suggest there is less species-level diversity in central Mexico than previously recognized, there is  
317 clearly more diversity in this region compared to the US and Canada where there is (a) more  
318 geographic space and (b) less life history variation within and between lineages. While we  
319 cannot fully explain the greater diversity in central Mexico, our results suggest that major  
320 patterns of diversification are related to a complex history of geographic isolation and secondary  
321 contact, in which life history strategy has played a less important role, at least in the long  
322 (evolutionary) run. We agree with previous work (12) that the complex geological history of the  
323 TMVB, including montane uplift and fluctuating drainage connectivity since the Miocene, has  
324 been the cornerstone of the evolutionary history of this species complex, and that the influences  
325 of geographic isolation and paedomorphosis may work synergistically to lead to the  
326 establishment of isolated populations. Linger questions notwithstanding, this large-scale  
327 genetic and geographic study establishes a framework for understanding the evolutionary history  
328 of the *Ambystoma tigrinum* species complex. The results presented here will facilitate  
329 comparative studies of the axolotl and its allies, provide direction for conservation prioritization  
330 and management, and strengthen the use of the tiger salamander species complex as a model  
331 system in biology.

332

## 333 **MATERIALS & METHODS**

### 334 *Geographic sampling*

335 We generated new data from 254 individuals sampled from across the range of the *A.*  
336 *tigrinum* complex (Fig. S1; Table S1). These individuals were combined with 93 individuals  
337 sampled in O'Neill et al. (32) to produce a data set comprising 347 individuals. We sampled a



338 large number of localities (188) with 1-9 individuals sampled per locality (mean = 1.8). This  
339 sampling included 166 individuals from the US, 2 from Canada, and 178 from Mexico.  
340 *Ambystoma californiense* samples were primarily included as a close outgroup to the remainder  
341 of the species complex and were sampled from localities with limited to no impacts of  
342 introgression from invasive *A. mavortium* (47). Additional outgroup data were generated for two  
343 species outside of the *A. tigrinum* complex: *A. opacum* and *A. texanum*. Full details regarding the  
344 generation of these data can be found in the Supplementary Materials. All *A. tigrinum* complex  
345 species were assigned to a life history category based on review of the published literature and  
346 private field records from authors of this study. These life history categories are as follow: 1 =  
347 obligate metamorph (no paedomorphs have been documented in the field); 2 = strong bias  
348 towards metamorphosis with rare paedomorphs found in the field; 3 = both metamorphosis and  
349 paedomorphosis common in the field; 4 = strong bias towards paedomorphosis with rare  
350 metamorphs found in the field; 5 = obligate paedomorph (no metamorphs have been documented  
351 in the field). In the text, “paedomorph” describes taxa scored as 4 or 5, while “facultative  
352 paedomorph” describes taxa scored as 2 or 3.

353

#### 354 *Data collection and sequencing*

355 We generated DNA sequence data from a panel of 95 nuclear loci developed specifically  
356 for the tiger salamander species complex. A more complete description of marker development  
357 can be found in O’Neill et al. (32). Genomic DNA was extracted using a DNeasy Blood and  
358 Tissue kit (Qiagen). For a small number of DNA extractions, we increased DNA quantities using  
359 a Repli-g whole genome amplification kit (Qiagen). We used an initial round of PCR in 96-well  
360 plate format to amplify all loci from an individual, followed by a smaller second round of PCR to

361 amplify loci that did not amplify in the initial PCR. See O'Neill et al. (32) for the details of PCR  
362 conditions and primer sequences.

363 PCR products from all loci were pooled for each individual in roughly equal  
364 concentrations based on the intensity of amplification as visualized on an agarose gel. Indexed  
365 Illumina sequencing libraries were generated for each individual using an Illumina Nextera XT  
366 DNA Library Preparation Kit (Illumina). Subsequent to library preparation, indexed libraries  
367 were quantified using a Qubit Fluorometer, pooled in equimolar concentrations, and checked on  
368 an Agilent Bioanalyzer to assure proper fragmentation.

369 Sequencing was performed in four rounds using an Illumina MiSeq. We performed an  
370 initial round using a total of seven individuals to test the compatibility of the Illumina Nextera  
371 XT library kit with our PCR amplicons. Three subsequent rounds of library preparation and  
372 sequencing were performed on sets of 96 individuals each, and some individuals were sequenced  
373 in multiple rounds due to initially low read counts. All sequencing was performed with paired-  
374 end 150 bp reads. Overall, we generated a total of 29,426,894 PE reads across all newly  
375 sequenced individuals, with an average of 309,757 PE reads, 1,148X coverage, and 7.6%  
376 missing loci per individual (Table S2).

377

### 378 *Bioinformatics and dataset generation*

379 All sequence reads were processed using a newly developed bioinformatic pipeline  
380 written for this project (<https://doi.org/10.5281/zenodo.3585970>) that produces multiple  
381 sequence alignments for individual loci and genome-wide SNP matrices sampled from variable  
382 sites. This pipeline was developed using the Snakemake workflow management system (77),  
383 linking together multiple software tools to take sequence data from raw reads to phased sequence

384 alignments for each locus. Demultiplexed paired-end Illumina fastq files were used as input, with  
385 separate forward and reverse read files for each individual. Sequence data were trimmed and  
386 filtered in Trimmomatic (78) using a sliding window of 4 base-pairs and a minimum average  
387 quality score of 15. Filtered sequence reads were then aligned to reference sequences from the  
388 O'Neill et al. (2013) dataset (32); specifically, we used the clean sequences of an *A. ordinarium*  
389 sample that had high coverage and low amounts of missing data. The resulting aligned contigs  
390 were processed using SAMtools (79) to filter and prepare data for FreeBayes (80), which was  
391 used to call variable sites. Variants were filtered with VCFTools (81) by removing indels and  
392 setting a quality threshold of phred score > 20 and a minimum read depth of 30. The program  
393 WhatsHap (82) was used to perform read-based phasing of the data for each locus x individual  
394 contig. Finally, phased haplotypes from each individual (two copies, regardless of homo- or  
395 heterozygosity) were combined into an alignment of all individuals using MAFFT with the  
396 default auto parameter (83). We generated fasta files of SNPs using the SNP-sites program (84)  
397 and created a SNP genotype matrix by sampling variable sites from a concatenated sequence  
398 alignment of all loci. We identified three loci (E12G1, E6A11, and E7G8) as potential paralogs  
399 based on high alignment error and high levels of heterozygosity for all individuals. These three  
400 loci were excluded from all analyses.

401       Across the remaining 92 loci, alignment lengths ranged from 123 to 630 bp (avg. = 270  
402 bp) with a total concatenated alignment of 24,788 bp. For the full dataset, including *A. texanum*  
403 and *A. opacum* outgroups, single-locus alignments contained an average of 55 variable sites  
404 (min. = 15, max. = 121) and an average of 41 parsimony informative sites (min. = 11, max. =  
405 102). Population genetic analyses restricted to the *A. tigrinum* complex including *A.*

406 *californiense*—which were further filtered for non-biallelic SNPs and a minor allele count  $\geq 3$ —  
407 contained a total of 2,360 SNPs.

408

#### 409 *Population structure and lineage discovery*

410 We developed hypotheses of population-level lineages across the range of the *A. tigrinum*  
411 complex ignoring the existing taxonomy, starting with the identification of major geographic  
412 patterns of differentiation, and then performing a recursive set of analyses on more  
413 geographically restricted sets of individuals. In our initial round of analyses we used two non-  
414 parametric methods: principal components analysis (PCA) and discriminant analysis of principal  
415 components (DAPC) (33). While both analyses provide a multivariate summary of genetic data,  
416 DAPC is also used to assess the fit of data to varying numbers of population clusters. These  
417 analyses were applied to our full genotypic dataset including *A. californiense* and all remaining  
418 individuals from the *A. tigrinum* complex. The PCA was calculated using the function ‘prcomp’  
419 in the R package stats (85), while the DAPC was calculated using the package adegenet (86).  
420 The optimal number of principal components to retain for DAPC was identified using cross-  
421 validation via the xvalDapc function with default parameter values. DAPC was performed  
422 without prior assignment of individuals to groups across a range of cluster levels ( $K = 1-20$ ). We  
423 used two metrics to identify the best estimate of the primary splits in our data. First, we used the  
424 Bayesian Information Criterion (BIC) calculated in the DAPC analysis to assess the fit of the  
425 data to different levels of  $K$ . We note that the level of  $K$  with the absolute lowest BIC may not be  
426 a better explanation of the data than a  $K$  with a slightly higher BIC (87); therefore, we applied  
427 this measure for general guidance on a range of  $K$  that may describe the data well. We paired this  
428 assessment with visualizations of the first and second principal components (Fig. S2, S5) and

429 DAPC ordination plots to identify the level of  $K$  at which similar clustering patterns could be  
430 observed with minimal change at successively higher levels of  $K$ . DAPC of the complete tiger  
431 salamander species complex identified a consistent pattern beginning at  $K = 5$  for high  
432 differentiation of all *A. californiense* samples (Fig. S3). Further DAPC analysis with *A.*  
433 *californiense* removed identified a consistent pattern beginning at  $K = 5$  for differentiation  
434 between clusters of populations from northern and central Mexico, and three clusters of U.S.  
435 populations (two from the Western U.S. and one from the Eastern U.S.; Fig. S4).

436         Using the clusters identified in the DAPC analysis of the total data set, we then used both  
437 DAPC and STRUCTURE v.2.3.4 (88) to analyze subsequent data sets comprising smaller  
438 numbers of individuals. Recursive rounds of DAPC analyses were stopped when BIC scores  
439 showed little improvement ( $\Delta\text{BIC} < 2$ ) at values of  $K > 1$ . STRUCTURE analyses used an  
440 admixture model and 500,000 generations following a burn-in of 100,000 generations. Analyses  
441 were performed for  $K = 1-10$  with 16 replicate analyses for each  $K$ . To help identify an optimal  
442 value for  $K$ , we calculated  $\Delta K$  using the Evanno method (89) via the CLUMPAK web tool (90).  
443 A limitation of the Evanno method is that it cannot estimate the likelihood of  $K = 1$  (89), thus,  
444 we also visually inspected individual group assignments and concluded a value of  $K = 1$  if the  
445 corresponding DAPC cluster showed little improvement ( $\Delta\text{BIC} < 2$ ) at values of  $K > 1$ , or when  
446 individuals were simply being split without any geographic or individual clustering. We also  
447 evaluated models where  $K$  was equal to the number of currently recognized species in that  
448 genetic cluster (e.g.,  $K = 3$  for CM1, which included the type localities for three described  
449 species: *A. altamirani*, *A. leorae*, and *A. rivulare*). We mapped individual species assignments  
450 onto these results to test the potential correspondence between naïve clustering and the existing  
451 taxonomy (Fig. S9).

452

453 *Phylogenetic reconstruction*

454         Given the high levels of admixture among groups, we used SplitsTree v. 4.14.8 (35, 91)  
455 to generate four phylogenetic networks: one with all tiger salamander individuals, and one each  
456 for the U.S., central Mexico, and northern Mexico subgroups. Networks were constructed using  
457 uncorrected p-distances and the NeighborNet algorithm (92).

458         We also used three different analytical approaches to place hypothesized population  
459 lineages in a phylogenetic framework. For all analyses we used a reduced data set containing the  
460 concatenated data for 2-7 representative individuals from each population genetic cluster, which  
461 limited computation time and avoided violating the coalescent-model assumption of zero gene  
462 flow. We first inferred the phylogeny using Bayesian Inference in BEAST v.1.8.3 (37). Analyses  
463 were run for 5 million generations, sampling every 1,000 generations after the first 500,000  
464 generations were removed as burn-in. Run convergence was assessed with Tracer v.1.6.0 (93).  
465 Next, we inferred a maximum-likelihood phylogeny using RAxML v.8 (38). Node support was  
466 assessed using a rapid bootstrap analysis with 1,000 replicates, which was summarized as a 95%  
467 rule consensus tree using the program SumTrees in the DendroPy python library (94). For both  
468 BEAST and RAxML, PartitionFinder (95) was used to identify the number of preferred gene  
469 partitions and their substitution models, and analyses were performed on the CIPRES Science  
470 Gateway server (96). Finally, we inferred phylogenetic relationships using SVDquartets (36)  
471 implemented in PAUP\* version 4.0a164 (97), sampling all possible quartets and assessing node  
472 support with 1,000 bootstrap replicates. For all phylogenetic analyses, trees were visualized  
473 using FigTree v.1.4.2 (98).

474

475 *Tests of migration and population differentiation of paedomorphic taxa*

476 We used the coalescent-based program Migrate-N v.3.2 (99) to explicitly test for  
477 population structure and gene flow in each obligately paedomorphic species of *Ambystoma* (*A.*  
478 *andersoni*, *A. dumerilii*, *A. taylori*, and *A. mexicanum*). For each model (Fig. S14), we treated  
479 paedomorphic species as distinct populations, and the facultatively paedomorphic individuals  
480 from the same genetic cluster (CM3 or CM4) as another population. The best-fitting model was  
481 determined via Bayes factors (BF), which were calculated using Bézier-corrected marginal  
482 likelihoods (Table S3); the highest-ranking models have a BF = 0. Each Migrate-N analyses ran  
483 for 50 million steps, recording every 10 steps, with a burn-in of five million and the default  
484 heating scheme. Suitable upper bounds for priors on population size ( $\Theta$ ) and migration rate ( $M$ )  
485 were determined from an initial test run of 10 million steps for each analysis. Median values and  
486 95% confidence intervals of  $\Theta$  and  $M$  are in Fig. 4 and Table S4.

487 Within CM3 and CM4, we also calculated pairwise  $\Phi_{ST}$  (a metric of population  
488 differentiation) among all populations using the function ‘pairPhiST’ in the R package  
489 haplotypes (100). These values were plotted against pairwise geographic distances (Fig. 4),  
490 which were calculated from locality latitude/longitude data (Table S1) and converted to  
491 kilometers using the function ‘rdist.earth’ in the R package fields (101). A life history matrix was  
492 also generated by assigning a value of 0 for pairwise comparisons of populations with the same  
493 life history and a value of 1 for populations with different life histories (i.e., facultatively  
494 paedomorphic vs. obligately paedomorphic). Paedomorph-paedomorph comparisons were  
495 omitted to avoid confounding them with facultative-facultative comparisons. Finally, we used  
496 these matrices in a partial mantel test [function ‘mantel.partial’ package vegan (102)] to test for a

497 correlation between  $\Phi_{ST}$  and life history while correcting for geographic distance. Significance of  
498 this test was determined using 999 permutations and an alpha level of 0.05.

499

#### 500 **DATA AVAILABILITY**

501 Supplementary figures and tables are provided with the online version of this manuscript.  
502 Input files for all population genetic and phylogenetic analyses are available via figshare  
503 ([https://figshare.com/projects/Life\\_history\\_strategy\\_does\\_not\\_reflect\\_genetic\\_differentiation\\_in](https://figshare.com/projects/Life_history_strategy_does_not_reflect_genetic_differentiation_in_the_tiger_salamander_species_complex/74115)  
504 [\\_the\\_tiger\\_salamander\\_species\\_complex/74115](https://figshare.com/projects/Life_history_strategy_does_not_reflect_genetic_differentiation_in_the_tiger_salamander_species_complex/74115)). Sequence data are available on the NCBI  
505 Sequence Read Archive (BioProject accession PRJNA594660).

506

#### 507 **ACKNOWLEDGEMENTS**

508 This project was supported by grants from the National Science Foundation [DEB-  
509 0949532, DEB-1355000, and DEB-1406876 (DDIG awarded to J. D. Kratovil)] and by a  
510 University Research Fellowship awarded to K. M. Everson from the University of Kentucky. We  
511 thank Chris Beachy, Jim Bogart, Ken Carbale, Sheri Church, Jeff LeClere, Carol Hall, Paul  
512 Moler, Nancy Staub, and Ken Wray for genetic samples, and Jose Bocanegra, Ben Browning,  
513 Mackenzie Humphrey, Mary Virginia Gibbs, Ricky Grewelle, Alan Lemmon, Emily Moriarty  
514 Lemmon, Deborah Lu, Stephanie Mitchell, Alex Noble, Tolu Odukoya, Ben Tuttle, and Josh  
515 Williams for assistance with data collection and analyses.

516



517

518 **REFERENCES**

- 519 1. S. R. Palumbi, Marine speciation on a small planet. *Trends Ecol. Evol.* **7**, 114–118 (1992).
- 520 2. S. Mopper, S. Y. Strauss, *Genetic Structure and Local Adaptation in Natural Insect*  
521 *Populations: Effects of Ecology, Life History, and Behavior* (Springer US, 1998).
- 522 3. S. J. Gould, *Ontogeny and Phylogeny* (Harvard University Press, 1977).
- 523 4. D. B. Wake, Paedomorphosis. *J. Herpetol.* **14**, 80 (1980).
- 524 5. H. H. Whiteman, Evolution of facultative paedomorphosis in salamanders. *Q. Rev. Biol.*  
525 **69**, 205–221 (1994).
- 526 6. R. B. Page, *et al.*, Effect of thyroid hormone concentration on the transcriptional response  
527 underlying induced metamorphosis in the Mexican axolotl (*Ambystoma*). *BMC Genomics*  
528 **9**, 78 (2008).
- 529 7. S. R. Voss, Genetic Basis of Paedomorphosis in the Axolotl, *Ambystoma mexicanum*: A  
530 Test of the Single-Gene Hypothesis. *J. Hered.* **86**, 441–447 (1995).
- 531 8. S. R. Voss, H. B. Shaffer, Adaptive evolution via a major gene effect: paedomorphosis in  
532 the Mexican axolotl. *Proc. Natl. Acad. Sci. USA* **94**, 14185–9 (1997).
- 533 9. E. H. Taylor, New salamanders from Mexico with a discussion of certain known forms.  
534 *Univ. Kansas Sci. Bull.* **26**, 407–439 (1939).
- 535 10. R. Brandon, E. Maruska, W. Rumph, A new species of neotenic *Ambystoma* (Amphibia,  
536 Caudata) endemic to Laguna Alchichica, Puebla, Mexico. *Bull. South. Calif. Acad. Sci.*  
537 **80**, 112–125 (1981).
- 538 11. H. B. Shaffer, M. L. McKnight, The polytypic species revisited: Genetic differentiation  
539 and molecular phylogenetics of the tiger salamander *Ambystoma tigrinum* (Amphibia:

- 540 Caudata) complex. *Evolution* **50**, 417–433 (1996).
- 541 12. H. B. Shaffer, Evolution in a paedomorphic lineage. I. An electrophoretic analysis of the  
542 Mexican ambystomatid salamanders. *Evolution* **38**, 1194–1206 (1984).
- 543 13. H. B. Shaffer, Phylogenetics of model organisms: The laboratory axolotl, *Ambystoma*  
544 *Mexicanum*. *Syst. Biol.* **42**, 508–522 (1993).
- 545 14. H. B. Shaffer, Evolution in a paedomorphic lineage. II. Allometry and form in the  
546 Mexican ambystomatid salamanders. *Evolution* **38**, 1207–1218 (1984).
- 547 15. H. B. Shaffer, R. C. Thomson, Delimiting Species in Recent Radiations. *Syst. Biol.* **56**,  
548 896–906 (2007).
- 549 16. P. R. Grant, Speciation and the adaptive radiation of Darwin’s finches. *Am. Sci.* **69**, 653–  
550 663 (1981).
- 551 17. O. Seehausen, Explosive speciation rates and unusual species richness in haplochromine  
552 cichlid fishes: Effects of sexual selection. *Adv. Ecol. Res.* **31**, 237–274 (2000).
- 553 18. M. Fegan, P. Prior, “How complex is the *Ralstonia solanacearum* species complex” in  
554 *Bacterial Wilt Disease and the Ralstonia Solanacearum Species Complex*, C. Allen, P.  
555 Prior, A. C. Hayward, Eds. (American Phytopathological Society Press, 2005), pp. 449–  
556 461.
- 557 19. J. Mallet, Hybrid speciation. *Nature* **446**, 279–283 (2007).
- 558 20. M. C. Fontaine, *et al.*, Extensive introgression in a malaria vector species complex  
559 revealed by phylogenomics. *Science* **347**, 1258524 (2015).
- 560 21. J. Geml, G. A. Laursen, K. O’Neill, H. C. Nusbaum, D. L. Taylor, Beringian origins and  
561 cryptic speciation events in the fly agaric (*Amanita muscaria*). *Mol. Ecol.* **15**, 225–239  
562 (2005).

- 563 22. R. Newman, Adaptive plasticity in amphibian metamorphosis. *Bioscience* **42**, 671–678  
564 (1992).
- 565 23. H. H. Whiteman, S. A. Wissinger, W. S. Brown, Growth and foraging consequences of  
566 facultative paedomorphosis in the tiger salamander, *Ambystoma tigrinum nebulosum*.  
567 *Evol. Ecol.* **10**, 433–446 (1996).
- 568 24. P. J. Fernandez, J. P. Collins, Effect of environment and ontogeny on color pattern  
569 variation in Arizona tiger salamanders (*Ambystoma tigrinum nebulosum* Hallowell).  
570 *Copeia* **1988**, 928 (1988).
- 571 25. S. P. D. Riley, H. B. Shaffer, S. R. Voss, B. M. Fitzpatrick, Hybridization between a rare,  
572 native tiger salamander (*Ambystoma californiense*) and its introduced congener. *Ecol.*  
573 *Appl.* **13**, 1263–1275 (2003).
- 574 26. D. W. Weisrock, H. B. Shaffer, B. L. Storz, S. R. Storz, S. R. Voss, Multiple nuclear gene  
575 sequences identify phylogenetic species boundaries in the rapidly radiating clade of  
576 Mexican ambystomatid salamanders. *Mol. Ecol.* **15**, 2489–2503 (2006).
- 577 27. G. Parra-Olea, *et al.*, Conservation genetics of threatened Mexican axolotls (*Ambystoma*).  
578 *Anim. Conserv.* **15**, 61–72 (2012).
- 579 28. E. Routman, Population structure and genetic diversity of metamorphic and paedomorphic  
580 populations of the tiger salamander, *Ambystoma tigrinum*. *J. Evol. Biol.* **6**, 329–357  
581 (1993).
- 582 29. R. Percino-Daniel, E. Recuero, E. Vázquez-Domínguez, K. R. Zamudio, G. Parra-Olea,  
583 All grown-up and nowhere to go: Paedomorphosis and local adaptation in *Ambystoma*  
584 salamanders in the Cuenca Oriental of Mexico. *Biol. J. Linn. Soc.* **118**, 582–597 (2016).
- 585 30. R. A. Brandon, Hybridization between the Mexican salamanders *Ambystoma dumerilii*

- 586 and *Ambystoma mexicanum* under laboratory conditions. *Herpetologica* **28**, 199–207  
587 (1972).
- 588 31. R. A. Brandon, Interspecific hybridization among Mexican and United States salamanders  
589 of the genus *Ambystoma* under laboratory conditions. *Herpetologica* **33**, 133–152 (1977).
- 590 32. E. M. O’Neill, *et al.*, Parallel tagged amplicon sequencing reveals major lineages and  
591 phylogenetic structure in the North American tiger salamander (*Ambystoma tigrinum*)  
592 species complex. *Mol. Ecol.* **22**, 111–129 (2013).
- 593 33. T. Jombart, S. Devillard, F. Balloux, Discriminant analysis of principal components: A  
594 new method for the analysis of genetically structured populations. *BMC Genet.* **11**, 94  
595 (2010).
- 596 34. H. B. Shaffer, G. B. Pauly, J. C. Oliver, P. C. Trenham, The molecular phylogenetics of  
597 endangerment: Cryptic variation and historical phylogeography of the California tiger  
598 salamander, *Ambystoma californiense*. *Mol. Ecol.* **13**, 3033–3049 (2004).
- 599 35. D. H. Huson, SplitsTree: Analyzing and visualizing evolutionary data. *Bioinformatics* **14**,  
600 68–73 (1998).
- 601 36. J. Chifman, L. Kubatko, Quartet inference from SNP data under the coalescent model.  
602 *Bioinformatics* **30**, 3317–3324 (2014).
- 603 37. A. J. Drummond, A. Rambaut, BEAST: Bayesian evolutionary analysis by sampling trees.  
604 *BMC Evol. Biol.* **7**, 214 (2007).
- 605 38. A. Stamatakis, RAxML version 8: A tool for phylogenetic analysis and post-analysis of  
606 large phylogenies. *Bioinformatics* **30**, 1312–1313 (2014).
- 607 39. A. A. Dugès, *Description d’un axolotl des montagnes de las cruces (Amblystoma [sic]*  
608 *altamirani, A. Dugès)* (Imprimerie du Ministère de “Fomento,” 1895).

- 609 40. E. H. Taylor, Herpetological novelties from Mexico. *Univ. Kansas Sci. Bull.* **29**, 343–358  
610 (1943).
- 611 41. E. H. Taylor, A new ambystomid salamander from the Plateau Region of Mexico. *Univ.*  
612 *Kansas Sci. Bull.* **30**, 57–61 (1944).
- 613 42. S. Krebs, R. Brandon, A new species of salamander (family Ambystomatidae) from  
614 Michoacan, Mexico. *Herpetologica* **40**, 238–245 (1984).
- 615 43. A. A. Dugès, Una nueva especie de ajolote de la Laguna de Patzcuaro. *La Nat.* **1**, 241–244  
616 (1870).
- 617 44. J. Dixon, A new species of salamander of the genus *Ambystoma* from Jalisco, Mexico.  
618 *Copeia* **1**, 99–101 (1963).
- 619 45. G. Shaw, F. Nodder, *The Naturalist's Miscellany; or Coloured Figures of Natural Objects*  
620 *Drawn and Described Immediately from Nature*, 9th Ed. (Nodder & Co., 1798).
- 621 46. A. A. Dugès, Erpetología del valle de México. *La Nat.* **2**, 97–146 (1888).
- 622 47. J. R. Johnson, R. C. Thomson, S. J. Micheletti, H. B. Shaffer, The origin of tiger  
623 salamander (*Ambystoma tigrinum*) populations in California, Oregon, and Nevada:  
624 Introductions or relicts? *Conserv. Genet.* **12**, 355–370 (2011).
- 625 48. E. H. Taylor, Two new ambystomid salamanders from Chihuahua. *Copeia* **3**, 143–146  
626 (1941).
- 627 49. R. Webb, Observations on tiger salamanders (*Ambystoma tigrinum* complex, family  
628 Ambystomatidae) in Mexico with description of a new species. *Bull. Maryl. Herpetol.*  
629 *Soc.* **40**, 122–143 (2004).
- 630 50. H. B. Shaffer, Biosystematics of *Ambystoma rosaceum* and *A. tigrinum* in Northwestern  
631 Mexico. *Copeia* **1983**, 67 (1983).

- 632 51. R. A. Brandon, Spontaneous and induced metamorphosis of *Ambystoma dumerilii*  
633 (Dugès), a paedogenetic Mexican salamander, under laboratory conditions. *Herpetologica*  
634 **32**, 429–438 (1976).
- 635 52. H. M. Wilbur, J. P. Collins, Ecological aspects of amphibian metamorphosis: Nonnormal  
636 distributions of competitive ability reflect selection for facultative metamorphosis. *Science*  
637 **182**, 1305–1314 (1973).
- 638 53. R. M. Bonett, M. A. Steffen, S. M. Lambert, J. J. Wiens, P. T. Chippindale, Evolution of  
639 paedomorphosis in plethodontid salamanders: Ecological correlates and re-evolution of  
640 metamorphosis. *Evolution* **68**, 466–482 (2014).
- 641 54. C. R. Marshall, E. C. Raff, R. A. Raff, Dollo’s law and the death and resurrection of  
642 genes. *Proc. Natl. Acad. Sci. USA* **91**, 12283–12287 (1994).
- 643 55. M. J. West-Eberhard, Phenotypic plasticity and the origins of diversity. *Annu. Rev. Ecol.*  
644 *Syst.* **20**, 249–278 (1989).
- 645 56. M. J. West-Eberhard, Alternative adaptations, speciation, and phylogeny (A Review).  
646 *Proc. Natl. Acad. Sci. USA* **83**, 1388–92 (1986).
- 647 57. B. M. Fitzpatrick, Underappreciated consequences of phenotypic plasticity for ecological  
648 speciation. *Int. J. Ecol.* **2012**, 1–12 (2012).
- 649 58. M. Denoël, P. Poncin, J.-C. Ruwet, Sexual compatibility between two heterochronic  
650 morphs in the Alpine newt, *Triturus alpestris*. *Anim. Behav.* **62**, 559–566 (2001).
- 651 59. J. D. Krenz, P. A. Verrell, Integrity in the midst of sympatry: Does sexual incompatibility  
652 facilitate the coexistence of metamorphic and paedomorphic mole salamanders  
653 (*Ambystoma talpoideum*)? *J. Zool.* **258**, S0952836902001589 (2002).
- 654 60. H. H. Whiteman, J. D. Krenz, R. D. Semlitsch, Intermorph breeding and the potential for

- 655 reproductive isolation in polymorphic mole salamanders (*Ambystoma talpoideum*). *Behav.*  
656 *Ecol. Sociobiol.* **60**, 52–61 (2006).
- 657 61. H. Whiteman, J. Gutrich, R. Moorman, Courtship behavior in a polymorphic population of  
658 the tiger salamander, *Ambystoma tigrinum nebulosum*. *J. Herpetol.* **33**, 348–351 (1999).
- 659 62. R. D. Howard, R. S. Moorman, H. H. Whiteman, Differential effects of mate competition  
660 and mate choice on eastern tiger salamanders. *Anim. Behav.* **53**, 1345–1356 (1997).
- 661 63. D. H. Bos, R. N. Williams, D. Gopurenko, Z. Bulut, J. A. DeWoody, Condition-dependent  
662 mate choice and a reproductive disadvantage for MHC-divergent male tiger salamanders.  
663 *Mol. Ecol.* **18**, 3307–3315 (2009).
- 664 64. C. E. Nelson, R. R. Humphrey, Artificial interspecific hybridization among *Ambystoma*.  
665 *Herpetologica* **28**, 27–32 (1972).
- 666 65. S. R. Voss, H. B. Shaffer, Evolutionary genetics of metamorphic failure using wild-  
667 caught vs. laboratory axolotls (*Ambystoma mexicanum*). *Mol. Ecol.* **9**, 1401–1407 (2000).
- 668 66. S. R. Voss, K. L. Prudic, J. C. Oliver, H. B. Shaffer, Candidate gene analysis of  
669 metamorphic timing in ambystomatid salamanders. *Mol. Ecol.* **12**, 1217–1223 (2003).
- 670 67. J. B. Armstrong, G. M. Malacinski, *Developmental Biology of the Axolotl* (Oxford  
671 University Press, 1989).
- 672 68. J. M. Velasco, Anotaciones y observaciones al trabajo del Sr. D. A. Weismann sobre la  
673 transformación del ajolote Mexicano en Amblistoma. *La Nat.* **5**, 58–84 (1880).
- 674 69. H. M. Smith, The Mexican axolotl: Some misconceptions and problems. *Bioscience* **19**,  
675 593–615 (1969).
- 676 70. L. L. Bailey, T. R. Simons, K. H. Pollock, Estimating site occupancy and species  
677 detection probability parameters for terrestrial salamanders. *Ecol. Appl.* **14**, 692–702

- 678 (2004).
- 679 71. C. L. Morjan, L. H. Rieseberg, How species evolve collectively: Implications of gene flow  
680 and selection for the spread of advantageous alleles. *Mol. Ecol.* **13**, 1341–1356 (2004).
- 681 72. J. McKay, “An evaluation of captive breeding and sustainable use of the Mexican axolotl  
682 (*Ambystoma mexicanum*),” University of Kent, Canterbury, UK. (2003) (January 20,  
683 2020).
- 684 73. J. L. Tamayo, R. C. West, “The hydrography of middle America” in *Handbook of Middle*  
685 *American Indians*, R. Wauchope, R. C. West, Eds. (University of Texas Press, 1964), pp.  
686 84–121.
- 687 74. G. R. Hopkins, E. D. Brodie, Occurrence of amphibians in saline habitats: A review and  
688 evolutionary perspective. *Herpetol. Monogr.* **29**, 1–27 (2015).
- 689 75. K. De Queiroz, Species concepts and species delimitation. *Syst. Biol.* **56**, 879–886 (2007).
- 690 76. P. M. Hime, *et al.*, Phylogenomics reveals ancient gene tree discordance in the amphibian  
691 tree of life. *Syst. Biol.* (2020) <https://doi.org/10.1093/sysbio/syaa034> (May 12, 2020).
- 692 77. J. Koster, S. Rahmann, Snakemake: A scalable bioinformatics workflow engine.  
693 *Bioinformatics* **28**, 2520–2522 (2012).
- 694 78. A. M. Bolger, M. Lohse, B. Usadel, Trimmomatic: A flexible trimmer for Illumina  
695 sequence data. *Bioinformatics* **30**, 2114–2120 (2014).
- 696 79. H. Li, A statistical framework for SNP calling, mutation discovery, association mapping  
697 and population genetical parameter estimation from sequencing data. *Bioinformatics* **27**,  
698 2987–2993 (2011).
- 699 80. E. Garrison, G. Marth, Haplotype-based variant detection from short-read sequencing.  
700 *arXiv* **1207.3907** (2012).



- 701 81. P. Danecek, *et al.*, The variant call format and VCFtools. *Bioinformatics* **27**, 2156–2158  
702 (2011).
- 703 82. M. Martin, *et al.*, WhatsHap: Fast and accurate read-based phasing. *bioRxiv* **10.1101/08**  
704 (2016).
- 705 83. K. Katoh, D. M. Standley, MAFFT multiple sequence alignment software version 7:  
706 Improvements in performance and usability. *Mol. Biol. Evol.* **30**, 772–780 (2013).
- 707 84. A. J. Page, *et al.*, SNP-sites: Rapid efficient extraction of SNPs from multi-FASTA  
708 alignments. *Microb. genomics* **2**, e000056 (2016).
- 709 85. R Core Team, R: a language and environment for statistical computing (2012).
- 710 86. T. Jombart, adegenet: A R package for the multivariate analysis of genetic markers.  
711 *Bioinformatics* **24**, 1403–1405 (2008).
- 712 87. T. Jombart, C. Collins, A tutorial for discriminant analysis of principal components  
713 (DAPC) using adegenet 2.0.0. *adegenet.r-forge.r-project.org* (2015) (May 30, 2019).
- 714 88. J. K. J. Pritchard, M. Stephens, P. Donnelly, Inference of population structure using  
715 multilocus genotype data. *Genetics* **155**, 945–959 (2000).
- 716 89. G. Evanno, S. Regnaut, J. Goudet, Detecting the number of clusters of individuals using  
717 the software structure: A simulation study. *Mol. Ecol.* **14**, 2611–2620 (2005).
- 718 90. N. M. Kopelman, J. Mayzel, M. Jakobsson, N. A. Rosenberg, I. Mayrose, Clumpak: A  
719 program for identifying clustering modes and packaging population structure inferences  
720 across K. *Mol. Ecol. Resour.* **15**, 1179–1191 (2015).
- 721 91. D. H. Huson, D. Bryant, Application of phylogenetic networks in evolutionary studies.  
722 *Mol. Biol. Evol.* **23**, 254–267 (2006).
- 723 92. D. Bryant, V. Moulton, Neighbor-Net: An agglomerative method for the construction of

- 724 phylogenetic networks. *Mol. Biol. Evol.* **21**, 255–265 (2003).
- 725 93. A. Rambaut, A. Drummond, D. Xie, G. Baele, M. Suchard, Tracer v1.7 (2018).
- 726 94. J. Sukumaran, M. Holder, DendroPy: A Python library for phylogenetic computing.  
727 *Bioinformatics* **26**, 1569–1571 (2010).
- 728 95. R. Lanfear, B. Calcott, S. Y. W. Ho, S. Guindon, PartitionFinder: Combined selection of  
729 partitioning schemes and substitution models for phylogenetic analyses. *Mol Biol Evol* **29**,  
730 1695–1701 (2012).
- 731 96. M. A. Miller, W. Pfeiffer, T. Schwartz, Creating the CIPRES Science Gateway for  
732 inference of large phylogenetic trees in *2010 Gateway Computing Environments*  
733 *Workshop (GCE)*, (IEEE, 2010), pp. 1–8.
- 734 97. D. Swofford, PAUP 4.0 b10: Phylogenetic analysis using parsimony (2002) (December  
735 21, 2013).
- 736 98. A. Rambaut, FigTree, a graphical viewer of phylogenetic trees (2007) (May 8, 2014).
- 737 99. P. Beerli, M. Palczewski, Unified framework to evaluate panmixia and migration direction  
738 among multiple sampling locations. *Genetics* **185**, 313–326 (2010).
- 739 100. C. Aktas, Haplotypes: Haplotype inference and statistical analysis of genetic variation  
740 (2015).
- 741 101. D. Nychka, R. Furrer, J. Paige, S. Sain, fields: Tools for spatial data (2017).
- 742 102. P. Dixon, VEGAN, a package of R functions for community ecology. *J. Veg. Sci.* **14**,  
743 927–930 (2003).

744

## 745 **Figure Legends**

746 **Figure 1.** Discriminant analysis of principal components (DAPC) on (A) the entire genomic  
747 dataset (without *A. opacum* and *A. texanum* outgroups), and (B) the genomic dataset without *A.*  
748 *californiense*. In both analyses, patterns of genetic differentiation stabilized at values of  $K \geq 5$  ( $K$   
749 = 5 is shown in both plots, with colors representing genetic clusters). Points represent individuals  
750 and ellipses show the groups identified by DAPC. The first and second principal components  
751 from the DAPC are on the x and y axes, respectively. Results from additional values of  $K$  are  
752 provided in Supplementary Figures 3 and 4.

753  
754 **Figure 2.** Population genomic analyses of the *Ambystoma tigrinum* species complex. (A)  
755 STRUCTURE plot of central Mexico samples. While the Evanno et al. (2005) method identified  
756  $K = 7$ , four major geographic genetic groups are apparent and were analyzed separately in  
757 subsequent analyses (B-E). In each plot, vertical bars represent individuals, while the y-axis  
758 shows the membership probability for each group. Pie charts mapped below the assignment plot  
759 show the average group membership probability for that locality. Some localities were combined  
760 to a single pie chart to reduce visual clutter; see Table S1 for specific coordinates of each sample.  
761 The range of the Trans-Mexican Volcanic Belt (TMVB) is identified by shading and is modified  
762 from Ferrari (2004). The range of the Cuenca Oriental is outlined in red and is modified from  
763 Percino-Daniel et al. (2016). Two geographic outliers placed in CM2 are thought to represent  
764 range introductions and are not shown here, but are discussed in supplementary text and shown  
765 in Fig. S9. (F,G) STRUCTURE results from analyses of the U.S. and northern Mexico groups,  
766 respectively. Detailed results are shown in Figs. S11-S12. Black squares on the maps denote the  
767 type localities of all species included in this study. On each STRUCTURE membership plot,  
768 salamander face symbols denote the presence of salamanders with a life history category of 1-3  
769 (the cartoon lacks gills) or 4-5 (paedomorphic, cartoon shows gills); groups labeled with both  
770 symbols contain a mixture of these life history categories.

771  
772 **Figure 3.** Results of phylogenetic network analyses (left) and the SVDquartets-based species  
773 tree analysis (right) of the *Ambystoma tigrinum* species complex. Clades are colored according to  
774 their cluster assignments in population genetic analyses, as in Fig. 2. In phylogenetic networks,  
775 species names are only shown for paedomorphic taxa in categories 4 or 5 (Table 1). Life history  
776 categories for all taxa are given in parentheses in the species tree. Note that SVDquartet analysis  
777 used a subset of individuals, indicated by solid circles on the phylogenetic networks.  
778 Phylogenetic results from Bayesian and maximum-likelihood concatenated analyses were largely  
779 concordant with the quartets tree (Fig. S13), although two important differences are indicated by  
780 dashed lines. Bootstrap support (BS) values are indicated on each node of the quartets tree (BS  
781 values  $\geq 95$  are not shown), while tips are labeled with individual IDs (Table S1). Branch lengths  
782 are not scaled to time or substitution rate.

783  
784 **Figure 4.** Maps (left) show localities for CM3 and CM4, the two genetic clusters containing  
785 paedomorphic taxa (life history categories 4 and 5). The top-ranked migration model is shown to  
786 the right of each map, with median mutation-scaled effective population sizes ( $\Theta$ ) shown inside  
787 the shapes denoting populations. Arrows indicate the direction of migration ( $M = m/\mu$ , where  $m$   
788 is the fraction of immigrants in each generation and  $\mu$  is the mutation rate per generation per site)  
789 and median migration rates are provided next to each arrow. Full model test results are provided

790 in Table S3 and full parameter estimates are provided in Table S4. Scatterplots (right) show  
791 pairwise geographic distances by pairwise  $\phi_{ST}$  among all populations. Point colors and shapes  
792 denote the life history strategies of the pairwise comparison being made: black squares = both  
793 populations are facultatively paedomorphic; red circles = one population is facultatively  
794 paedomorphic and one population is obligately paedomorphic; black stars = both populations are  
795 obligately paedomorphic. Solid lines denote the line of best fit, calculated separately for each life  
796 history comparison. Regressions were not performed on paedomorph-paedomorph comparisons  
797 due to low sample sizes. Shaded areas denote the 95% confidence interval for the regression. P-  
798 values to the right of each graph were calculated using a partial mantel test, which tested for a  
799 correlation between  $\phi_{ST}$  and life history while correcting for geographic distance (n.s. = not  
800 significant).  
801

**Table 1.** Currently recognized species in the *Ambystoma tigrinum* complex. Habitat preference, range, conservation status (“Status”), and life history strategy were compiled from AmphibiaWeb (2019) and the IUCN (2019). Conservation status abbreviations: LC = least concern, V = vulnerable, E = endangered, CE = critically endangered, DD = data deficient. Life history codes: 1 = obligate metamorph (no paedomorphs documented in the field), 2 = Strong bias towards metamorphosis with rare paedomorphs found in the field, 3 = Both metamorphosis and paedomorphosis common in the field, 4 = Strong bias towards paedomorphosis with rare metamorphs found in the field, 5 = obligate paedomorph (no metamorphs documented in the field). In the text, “paedomorph” describes taxa scored as 4 or 5, while “facultative paedomorph” describes taxa scored as 2 or 3.

| Species                                            | Habitat Preference                | Range                                                                                                                                                                                                    | Status | Life History |
|----------------------------------------------------|-----------------------------------|----------------------------------------------------------------------------------------------------------------------------------------------------------------------------------------------------------|--------|--------------|
| <i>Ambystoma altamirani</i> Dugès, 1895            | Streams, occasional ponds         | High elevations in the west and south of the Valley of Mexico (Mexico State, Morelos, and Distrito Federal)                                                                                              | E      | 2            |
| <i>Ambystoma amblycephalum</i> Taylor, 1940        | Ponds                             | Small area of Tacicuario (north and west Michoacan)                                                                                                                                                      | CE     | 2            |
| <i>Ambystoma andersoni</i> Krebs & Brandon, 1984   | Lakes / Ponds                     | Restricted to Lake Zacapu and its outflow streams (north-central Michoacan)                                                                                                                              | CE     | 5            |
| <i>Ambystoma bombypellum</i> Taylor, 1940          | Lakes / Ponds, occasional streams | Known only from type locality San Martin/Asunción, 15 km west of Morelia (Michoacan)                                                                                                                     | DD     | 2            |
| <i>Ambystoma californiense</i> Gray 1853           | Vernal pools                      | Great Central Valley and adjacent inner coast ranges, central California                                                                                                                                 | V      | 1            |
| <i>Ambystoma dumerilii</i> (Dugès, 1870)           | Lakes / Ponds                     | Restricted to Lake Patzcauro (north-central Michoacan)                                                                                                                                                   | CE     | 5            |
| <i>Ambystoma flavipiperatum</i> Dixon, 1963        | Lakes / Ponds, occasional streams | Sierra de Quila (Jalisco). Historically known from the type locality in Santa Cruz, southwest of Guadalajara.                                                                                            | E      | 3            |
| <i>Ambystoma granulosum</i> Taylor, 1944           | Lakes / Ponds, occasional streams | Northwest of Toluca city (Mexico State and border of Michoacan)                                                                                                                                          | CE     | 3            |
| <i>Ambystoma leorae</i> (Taylor, 1943)             | Streams                           | High elevations of Rio Frio in Iztaccihuatl -Popocatepetl Natl. Park (Mexico State and adjacent Puebla)                                                                                                  | CE     | 2            |
| <i>Ambystoma lermaense</i> (Taylor, 1940)          | Lakes / Ponds                     | Highlands near Toluca, in Rio Lerma and Lake Lerma near Almoloya (Mexico State)                                                                                                                          | E      | 3            |
| <i>Ambystoma mavortium</i> Baird, 1850*            | Lakes / Ponds                     | Widespread distribution from west-central Canada through the USA to northern Mexico (Sonora, Chihuahua, Coahuila). Disjunct distribution in northwestern USA and Canada (Washington, British Columbia).  | LC     | 3            |
| <i>Ambystoma mexicanum</i> (Shaw and Nodder, 1798) | Lakes                             | Southern areas of Xochimilco (Mexico City). Historically distributed in Lakes of Xochimilco and Chalco.                                                                                                  | CE     | 4            |
| <i>Ambystoma ordinarium</i> Taylor, 1940           | Streams                           | From south of Patzcauro through Morelia City to eastern Michoacan                                                                                                                                        | E      | 3            |
| <i>Ambystoma rivulare</i> (Taylor, 1940)           | Streams                           | Sierra Chinchua, Mariposa Monarca Biosphere Reserve, Michoacan, Valle de Bravo, Amanalco and Nevado de Toluca (Mexico State)                                                                             | E      | 2            |
| <i>Ambystoma rosaceum</i> Taylor, 1941             | Streams                           | Sierra Madre Occidental (Sonora, Durango, Chihuahua, Sinaloa, Nayarit, Jalisco)                                                                                                                          | LC     | 3            |
| <i>Ambystoma silvense</i> Webb, 2004               | Lakes / Ponds                     | Sierra Madre Occidental (at least Chihuahua, Durango)                                                                                                                                                    | DD     | 3            |
| <i>Ambystoma taylori</i> Brandon et al., 1982      | Saline lake                       | Restricted to Lake Alchichica (Puebla)                                                                                                                                                                   | CE     | 4            |
| <i>Ambystoma tigrinum</i> Green, 1825              | Lakes / Ponds                     | From southeast Canada south to east Texas and extending east of the Appalachian Mountains through the Atlantic Coastal Plain north to Long Island (New York)                                             | LC     | 2            |
| <i>Ambystoma velasci</i> (Dugès, 1888)             | Lakes / Ponds, Streams            | Sierra Madre Occidental (Chihuahua) and south across central Mexico (Durango, Jalisco, Nuevo León, Coahuila, Zacatecas, San Luis Potosi, Hidalgo, Queretaro, Tlaxcala, Puebla, Veracruz, Aguascalientes) | LC     | 3            |



## A) DAPC of full dataset

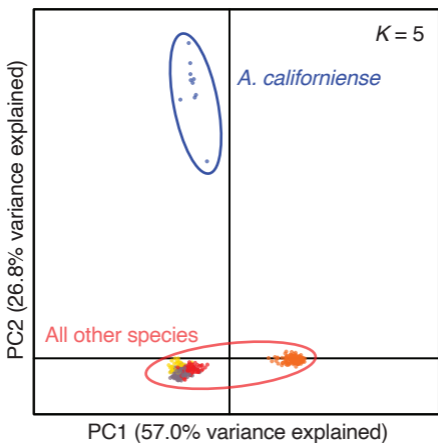

## B) DAPC without *A. californiense*

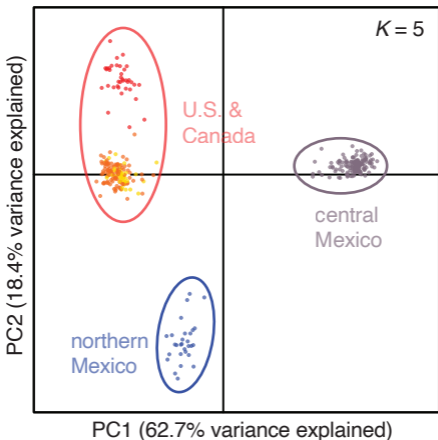

**A) Central Mexico (all groups),  $K = 7$**

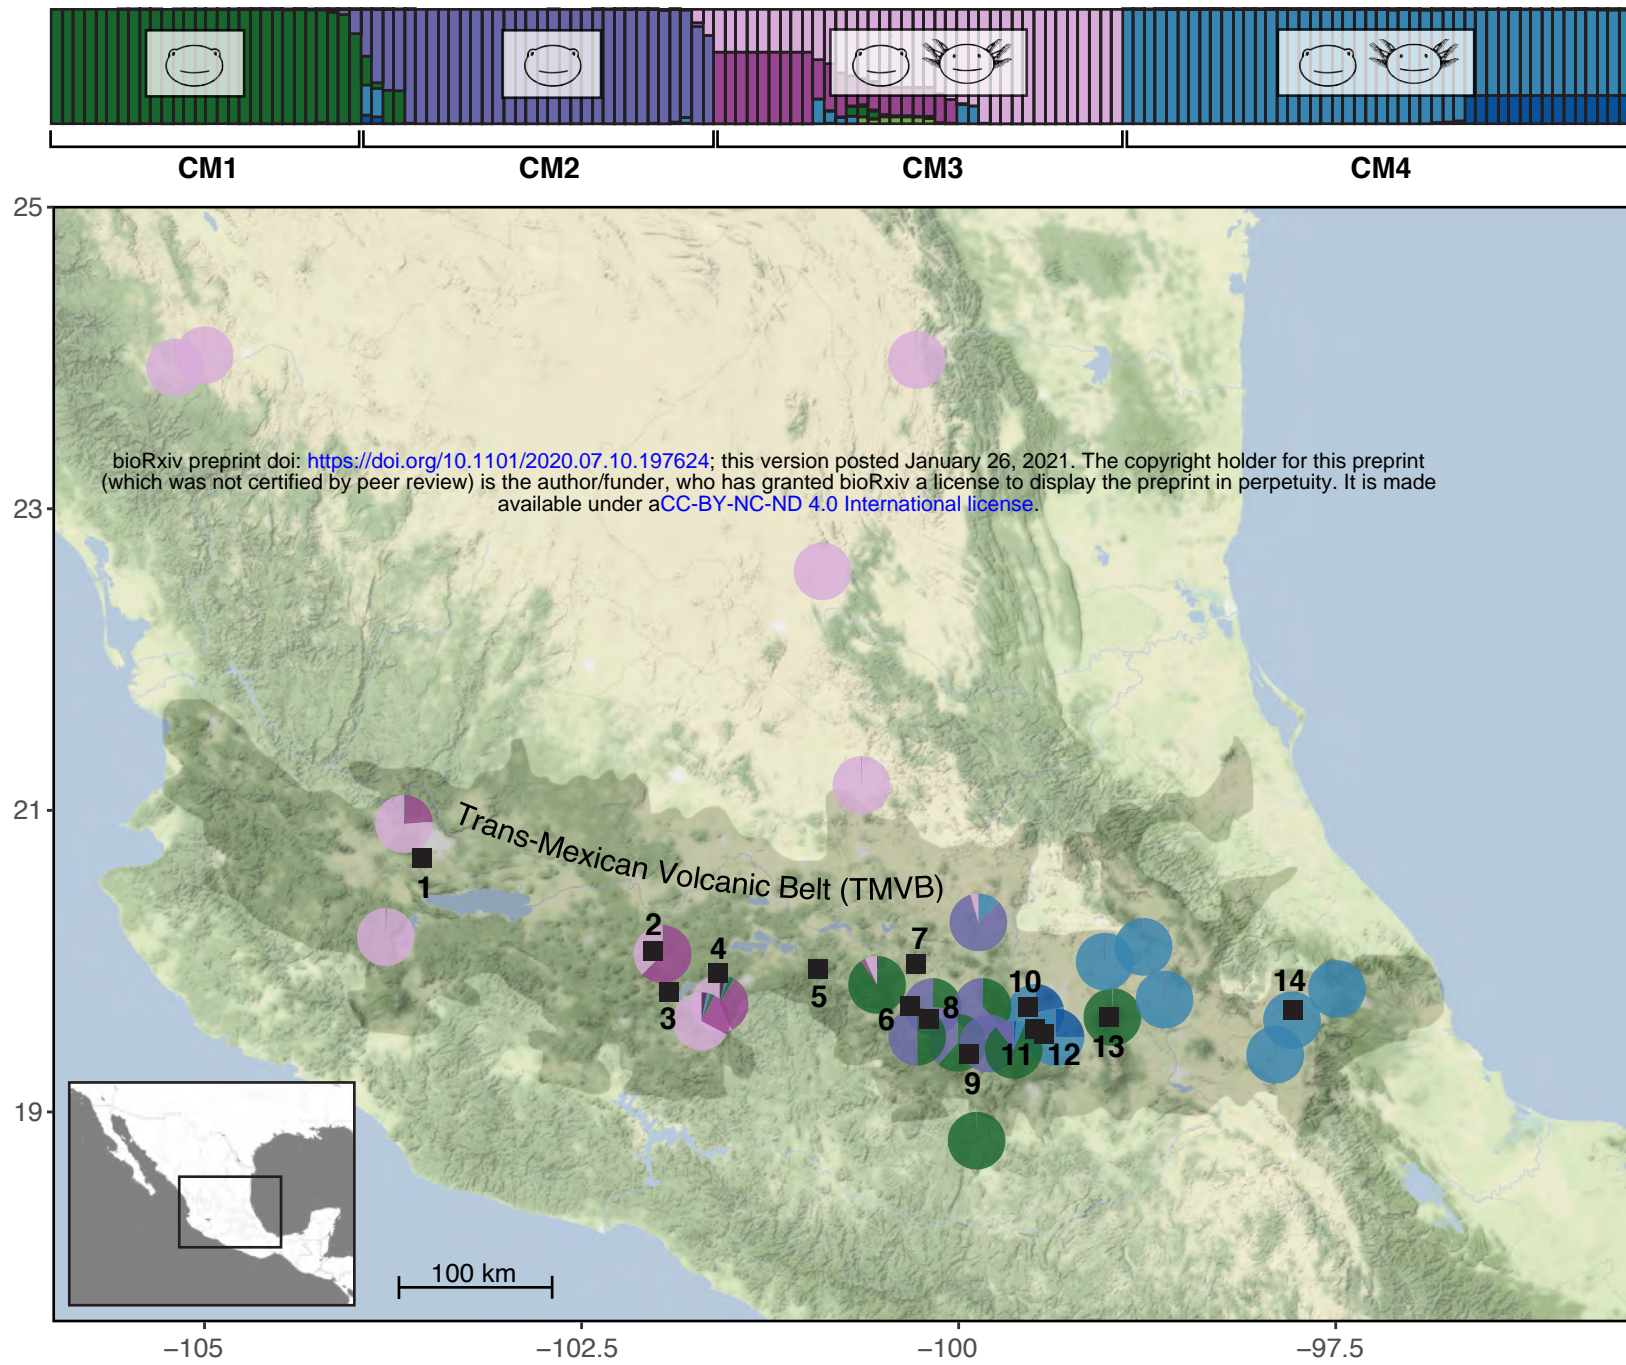

**B) Central Mexico 1 (CM1),  $K = 2$**

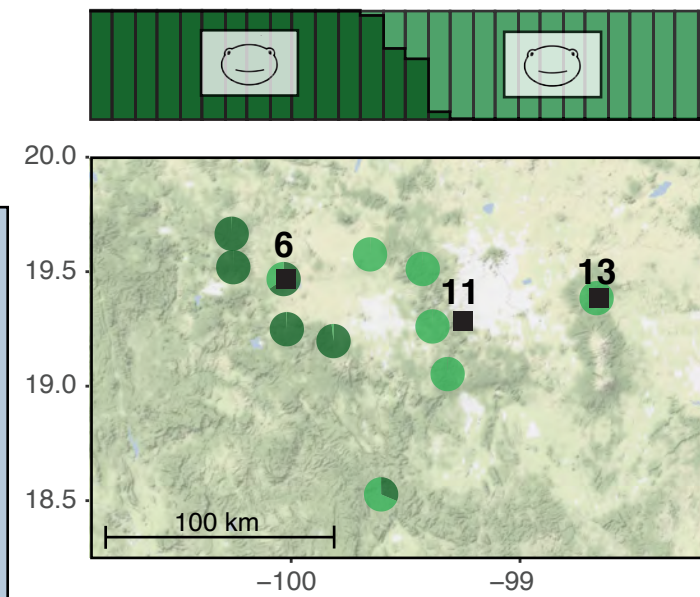

**C) Central Mexico 2 (CM2),  $K = 2$**

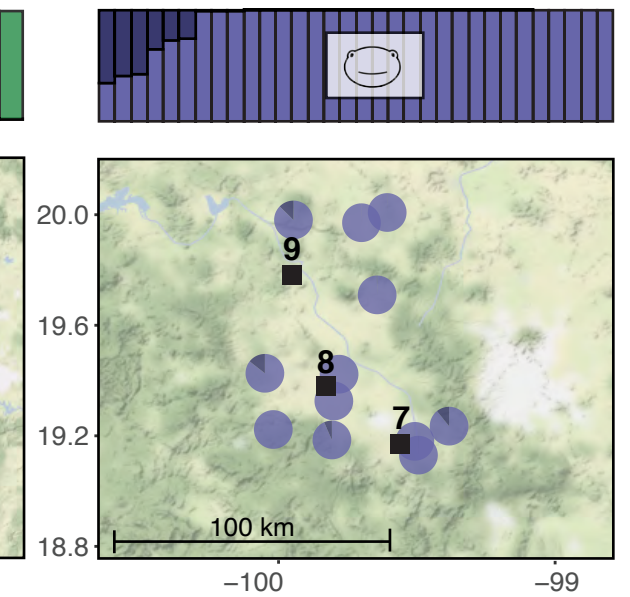

**D) Central Mexico 3 (CM3),  $K = 3$**

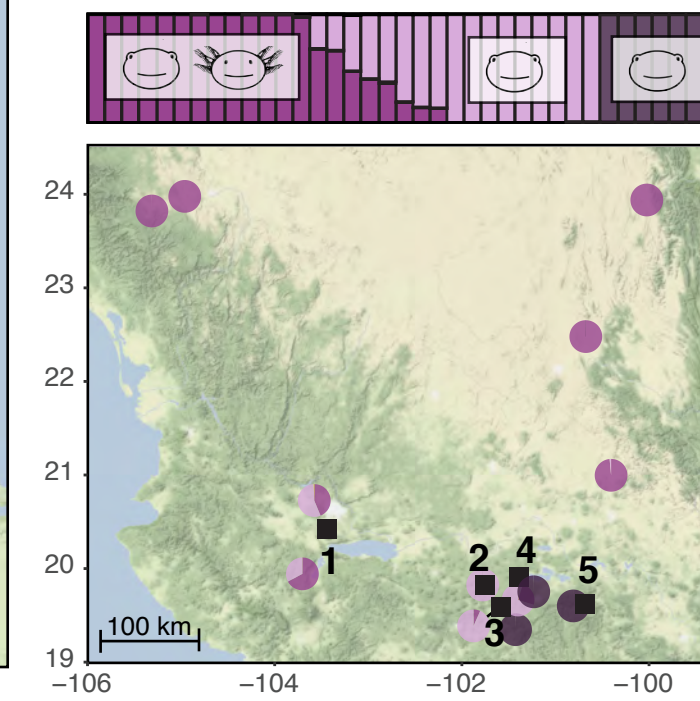

**E) Central Mexico 4 (CM4),  $K = 2$**

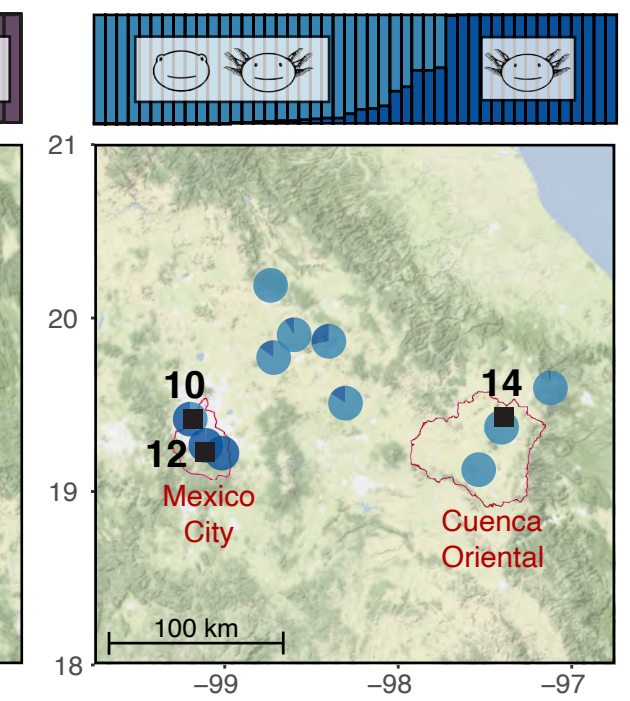

**F) United States and Canada,  $K = 3$**

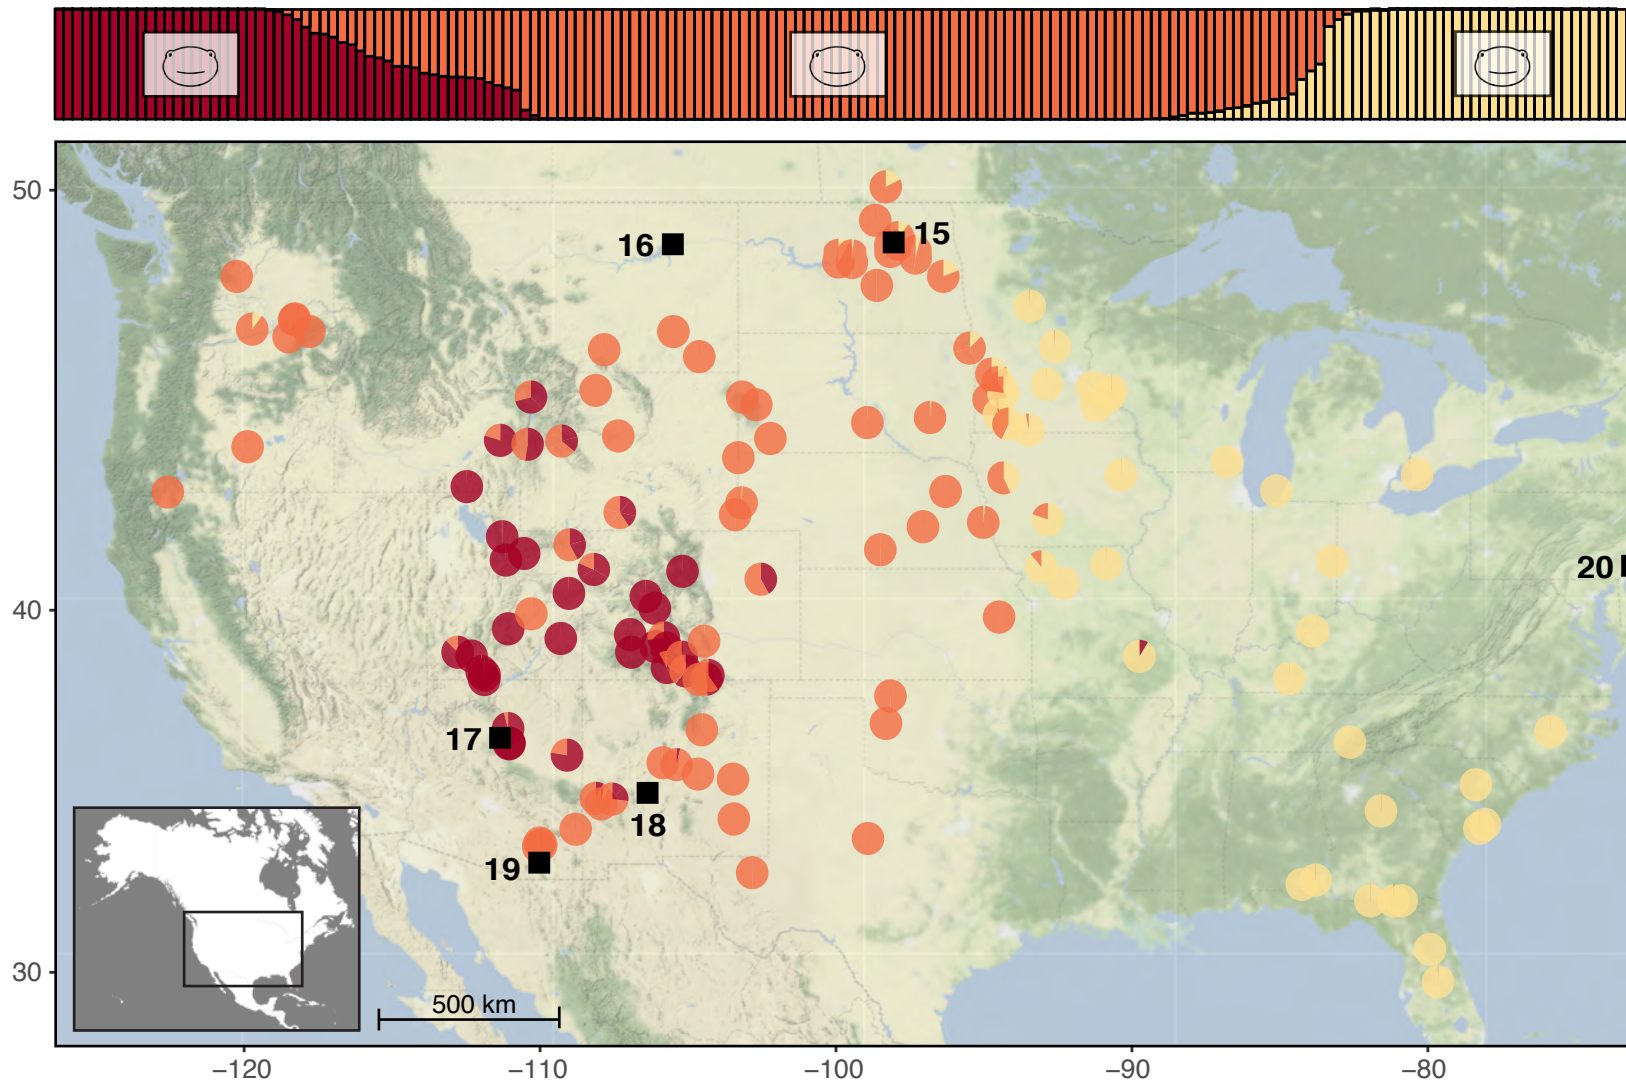

**G) Northern Mexico,  $K = 2$**

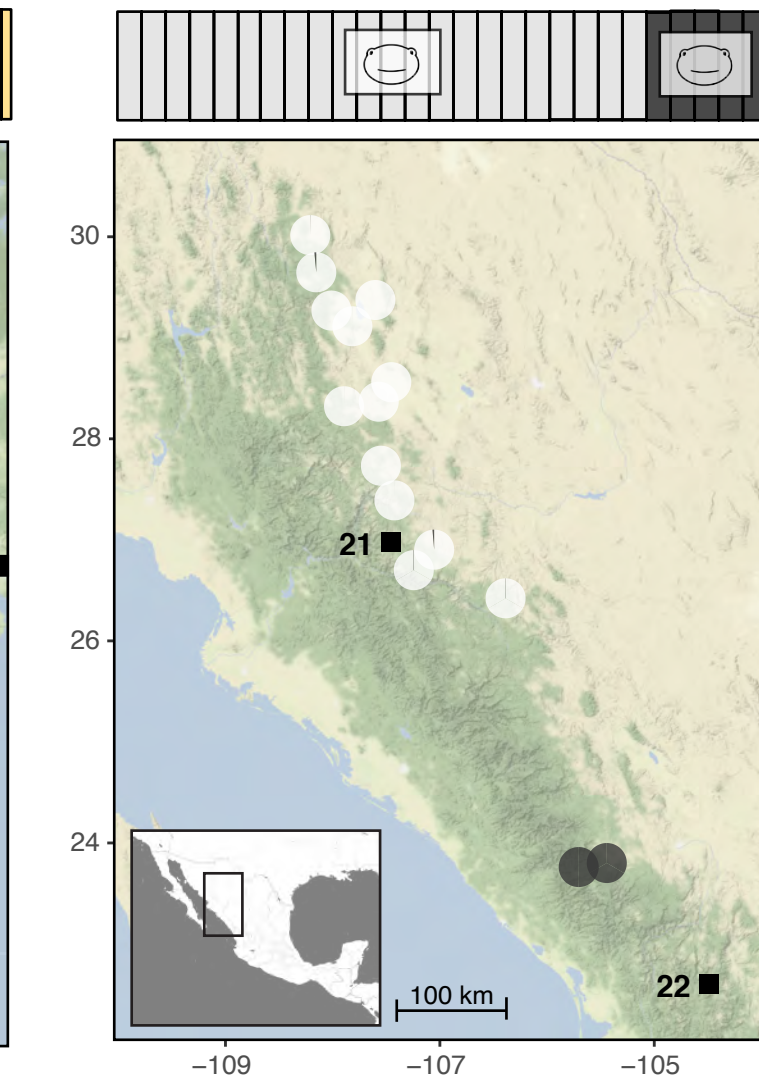

**Type Localities (■)**

- 1) *Ambystoma flavipiperatum*
- 2) *A. andersoni*
- 3) *A. dumerilii*
- 4) *A. amblycephalum*
- 5) *A. ordinarium*
- 6) *A. rivulare*
- 7) *A. bombypellum*
- 8) *A. granulorum*
- 9) *A. lermaense*
- 10) *A. velasci*
- 11) *A. altamirani*
- 12) *A. mexicanum*
- 13) *A. leorae*
- 14) *A. taylori*
- 15) *A. mavortium diaboli*
- 16) *A. m. melanostictum*
- 17) *A. m. nebulosum*
- 18) *A. m. mavortium*
- 19) *A. m. stebbinsi*
- 20) *A. tigrinum tigrinum*
- 21) *A. rosaceum*
- 22) *A. silvense*

Paedomorph (category 4 or 5)

Facultative Paedomorph/Metamorph (categories 1-3)



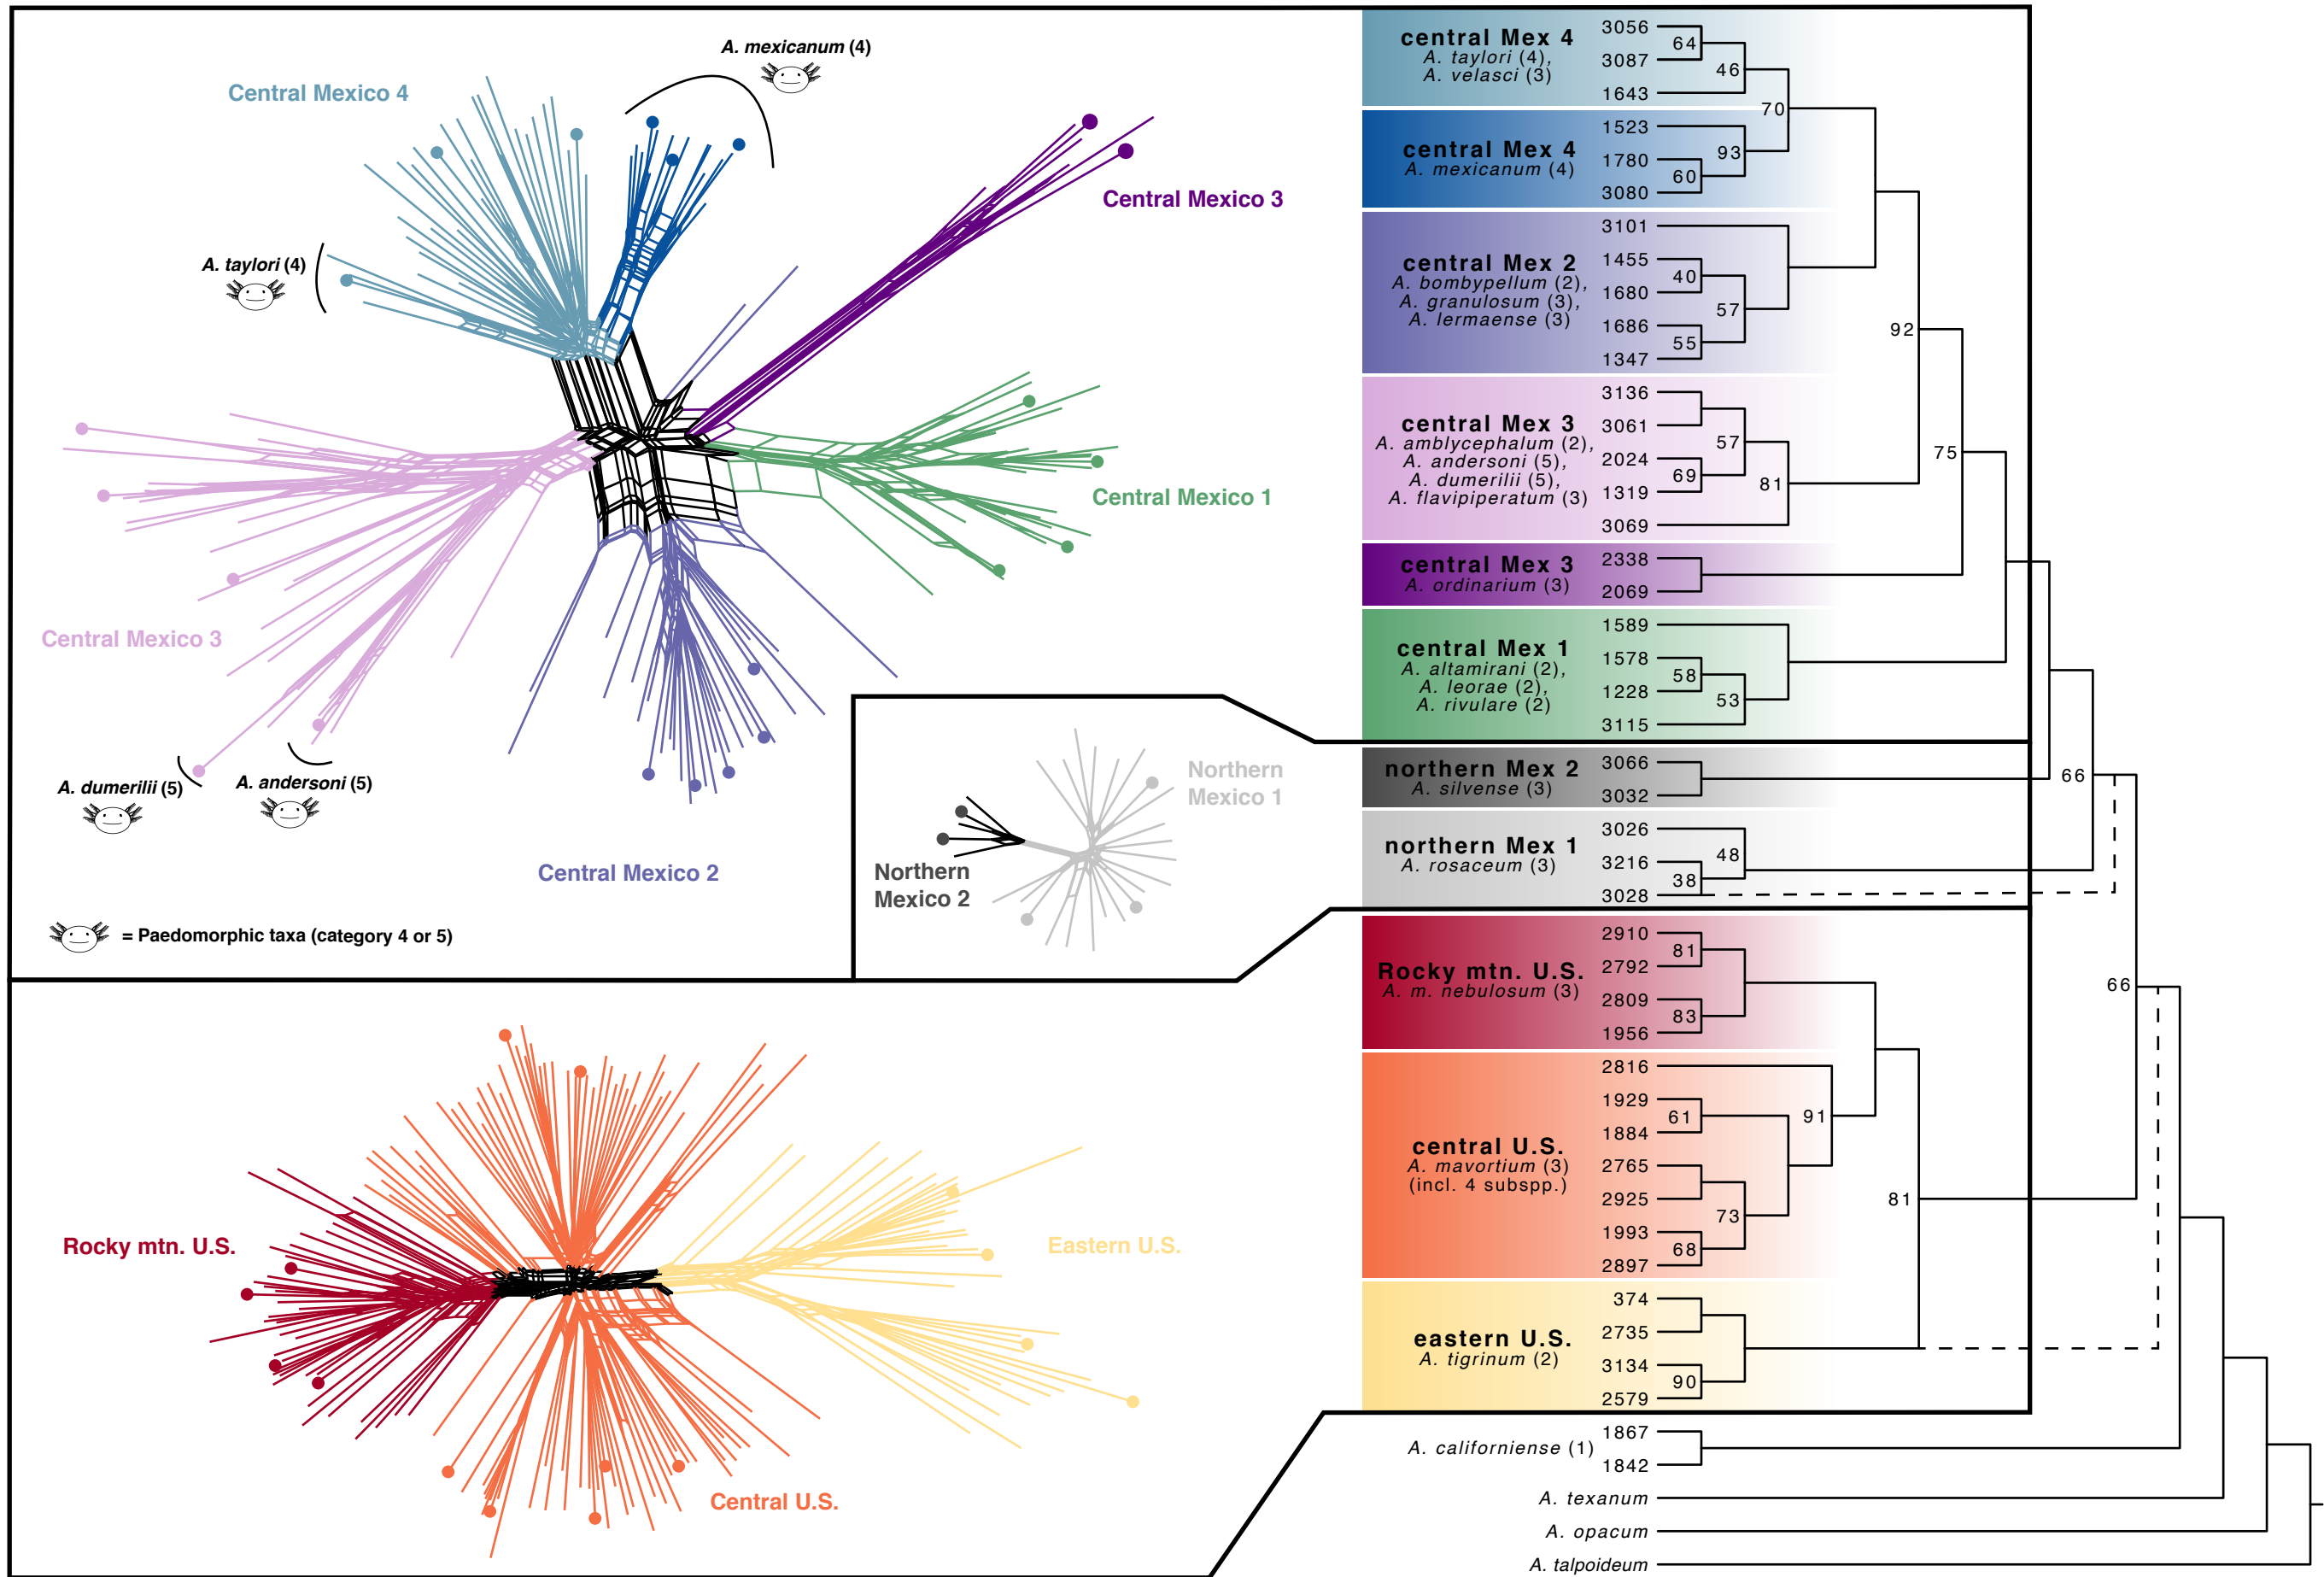

### Central Mexico Group 3 (CM3)

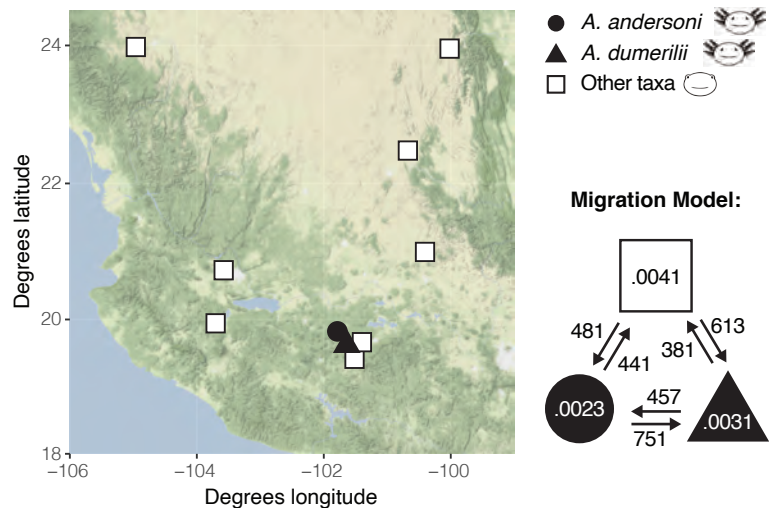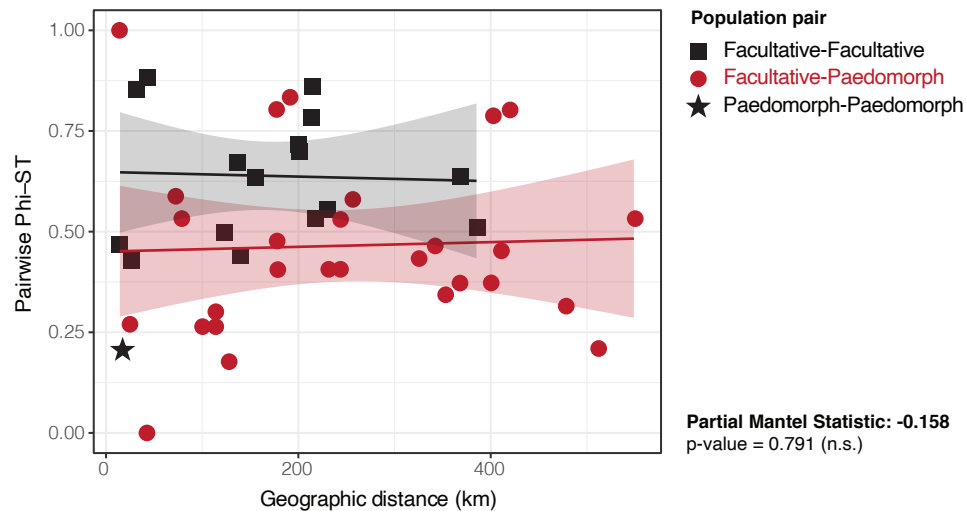

### Central Mexico Group 4 (CM4)

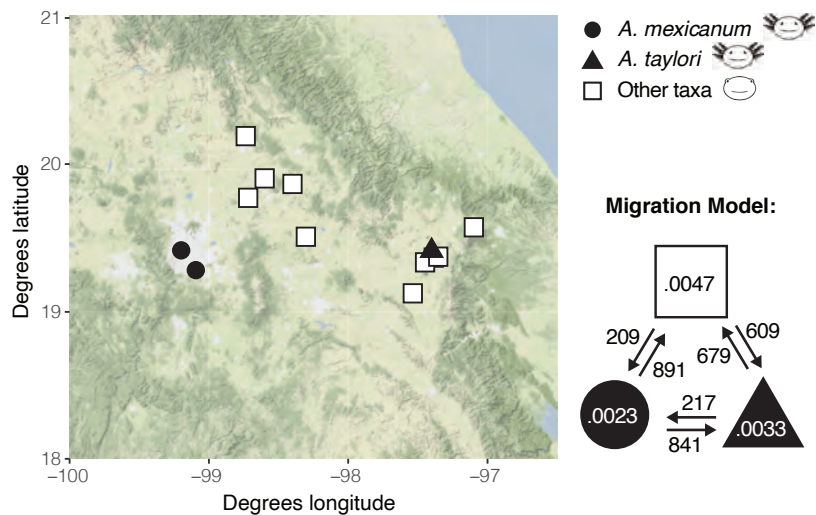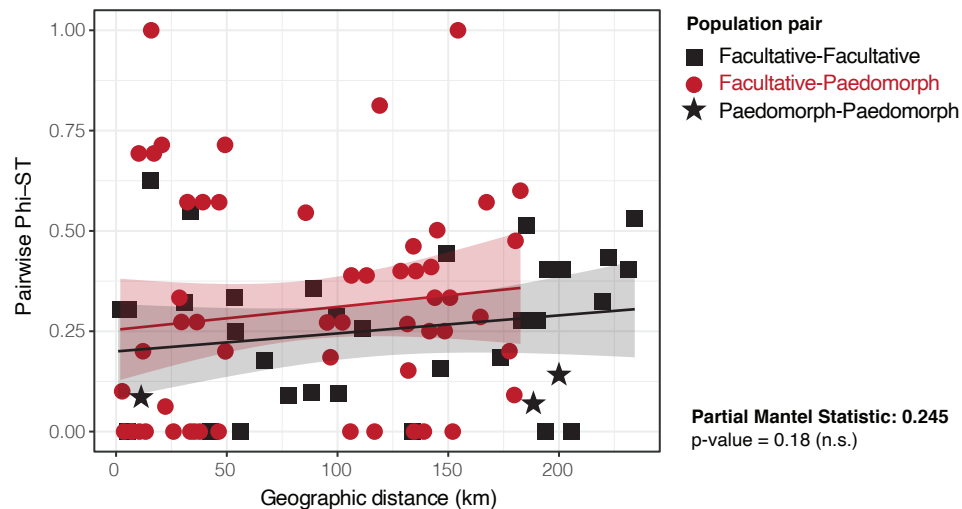

Source: https://www.biorxiv.org/content/10.1101/2020.07.10.197624v3.full.pdf
