# Supplementary material for: Geography is more important than life history in the recent diversification of the tiger salamander complex
Source: bioRxiv or medRxiv preprint supplement (doi:10.1101/2020.07.10.197624), 2021-01-26
Supplement: Supplementary file [file media-3.pdf]

1                                Supplementary Information for

2  
3        Geography is more important than life history in the recent diversification  
4        of the tiger salamander complex

5  
6        Kathryn M. Everson\*, Levi N. Gray\*, Angela G. Jones, Nicolette M. Lawrence, Mary  
7        E. Foley, Kelly L. Sovacool, Justin D. Kratovil, Scott Hotaling, Paul M. Hime,  
8        Andrew Storfer, Gabriela Parra-Olea, Ruth Percino-Daniel, X. Aguilar-Miguel, Eric. M. O’Neill,  
9        Luis Zambrano, H. Bradley Shaffer, David W. Weisrock

10  
11        \*Co-first authors

12        Corresponding author: David W. Weisrock  
13        Email: david.weisrock@uky.edu

14  
15        **This PDF file includes:**

16                        Supplementary text

17                        Figs. S1 to S10

18                        Tables S1 to S3

19                        References for SI citations

20                        References for SI citations

## 21 Supplementary Text

22 *Taxonomic recommendations for the A. tigrinum species complex.*

23 Our goal here is to make some taxonomic recommendations consistent with  
24 our findings in order to update what we currently know about the *Ambystoma*  
25 *tigrinum* complex. We provide an updated framework within which future studies can  
26 operate until lineage boundaries are further refined with additional ecological,  
27 morphological, and genomic data, and with reference to type specimens and series.  
28 We take a conservative approach; in cases where obligate (or near obligate)  
29 paedomorphic populations are not distinguishable with our data from surrounding  
30 facultatively paedomorphic populations, we recommend the use of subspecies. We  
31 find it useful to recognize biologically meaningful variation below the species level  
32 for a number of practical reasons (1). Locally adapted populations, for instance, can  
33 play important roles in the evolution of a lineage (2–4). There are likely evolutionary  
34 consequences for variation in frequency of paedomorphism among populations,  
35 which we hope will be investigated further in the tiger salamander complex (potential  
36 mechanisms discussed in reference 5). Characterizing fine-scale patterns of  
37 morphological diversity among populations in this complex would be an important  
38 contribution, particularly with respect to the genetic groups identified in this study.

39 The CM1 group included individuals that could be assigned to three  
40 recognized species: *Ambystoma* [= *Amblystoma*] *altamirani* Duges 1895 (6), *A. leorae*  
41 (Taylor 1943) (7), and *A. rivulare* [= *A. rivularis* (Taylor 1940)] (8). These three taxa  
42 (*A. altamirani*, *A. leorae*, and *A. rivulare*) are facultatively paedomorphic species that  
43 primarily occupy clear, fast-flowing streams. All have the same general coloration  
44 and are difficult to distinguish morphologically; Taylor's (7, 8) diagnoses focused  
45 primarily on subtle differences in body length and head shape. Within CM1, our  
46 STRUCTURE analysis identified  $K = 2$ , with *A. rivulare* in a western geographic  
47 group and the other two taxa in an eastern group; however, we note that these groups  
48 are genetically admixed (Fig. 2). If we consider admixture as evidence that these  
49 groups are not reproductively isolated, a single name should apply to all of these  
50 populations: following rules of taxonomic priority, the names *A. leorae* and *A.*  
51 *rivulare* should be synonymized with the oldest name, *A. altamirani*. However, given  
52 that fine-scale genetic differentiation is present in this group (S5, S6a), we  
53 recommend additional investigation using multiple lines of evidence to clarify species  
54 limits in CM1.

55 CM2 is also composed of geographically proximate populations representing  
56 three named forms: *A. bombypellum* [= *A. bombypella* Taylor 1939] (9), *A.*  
57 *granulosum* Taylor 1944 (10), and *A. lermaense* [= *Siredon lermaensis* (Taylor 1939)]  
58 (9). Both DAPC and STRUCTURE results yielded strong support for a single cluster,  
59 and all individuals used in our phylogenetic analyses were recovered as a single  
60 monophyletic group [RaxML bootstrap support (BS) = 100; BEAST Bayesian  
61 posterior probability (BPP) = 0.95; SVDquartets BS = 100]. We interpret these results  
62 as strong evidence that a single polytypic species in this group should be recognized.  
63 We suggest that *A. granulosum* and *A. bombypellum* should be synonymized and  
64 assigned to the single species name *A. lermaense*. Morphologically, Taylor (10) noted  
65 that *A. bombypellum* and *A. granulosum* were quite similar, except that *A.*  
66 *bombypellum* has smooth, almost shiny skin while the skin of *A. granulosum* appears  
67 granular. Interestingly, *A. lermaense* was described as having an intermediate state:  
68 “skin generally smooth, but in parts it may appear slightly granular” (9, p. 428). Thus,  
69 we further recommend recognition of the subspecies *A. lermaense bombypellum* and

70 *A. lermaense granulosum* pending morphological work to assess the variation in skin  
71 texture across *Ambystoma*.

72 The CM3 group contains individuals from multiple recognized species with a  
73 variety of life history strategies: three facultatively paedomorphic taxa [*A.*  
74 *amblycephalum* [=*A. amblycephala* Taylor 1939] (9), *A. flavipiperatum* Dixon 1963  
75 (11), and *A. ordinarium* [=*A. ordinaria* Taylor 1939] (9) and two taxa that are  
76 considered obligate paedomorphs [*A. andersoni* Krebs & Brandon 1984 (12) and *A.*  
77 *dumerilii* (Duges 1870) (13); but see (12, 14) for descriptions of occasional  
78 metamorphosed individuals]. A more exclusive STRUCTURE analysis of this group  
79 revealed that *A. ordinarium* does form a cluster that is genetically distinct from the  
80 remaining CM3 populations; this result was confirmed by phylogenetic analyses and  
81 corroborated by other studies (15, 16). Furthermore, *A. ordinarium* is phenotypically  
82 distinct from the remaining members of the CM3 clade (17). Notably, we did not  
83 recover any evidence for a second, cryptic species in the western portion of *A.*  
84 *ordinarium*'s range, which was hypothesized in a previous study (16). Thus, we  
85 continue to consider *A. ordinarium* a single, distinct species, although we recommend  
86 future fine-scale analyses to help understand its evolutionary history in the group.

87 The remaining species belonging to CM3 (*A. amblycephalum*, *A.*  
88 *flavipiperatum*, *A. andersoni*, and *A. dumerilii*) are highly admixed, which might be  
89 interpreted as “good” news for these highly threatened taxa, as their overall  
90 population sizes and geographic ranges might actually be larger than previously  
91 recognized (Fig S8c). However, we did find evidence for reproductive isolation  
92 among the obligate paedomorphic taxa, *A. andersoni* and *A. dumerilii*. We emphasize  
93 that *A. dumerilii*, despite showing substantial admixture with other populations in  
94 CM3, is still an ecologically unique, locally adapted lineage that warrants additional  
95 research and continued protection. As the only fixed paedomorphic lineage, further  
96 investigation into the timing and divergence of this population should attempt to  
97 determine the geographic context of speciation. We also recommend continued usage  
98 of *A. andersoni* Krebs & Brandon 1984 (12) due to our finding of isolation for the  
99 species in our demographic model testing (Fig 4). However, we note that none of our  
100 comparative samples were in close geographic proximity to Lake Zacapú (the nearest  
101 sample was collected from a locality 43 kilometers away) so additional work is  
102 needed to verify whether this species is truly isolated from nearby transforming  
103 populations. Finally, we recommend that *A. flavipiperatum* and *A. amblycephalum* be  
104 recognized by a single species name, with *A. amblycephalum* having priority.

105 Our results indicate that the axolotl, *A. mexicanum* (Shaw & Nodder 1798)  
106 (18), should continue to be recognized as a distinct species (see discussion in main  
107 text); however, the remaining members of CM4 represent a more challenging  
108 taxonomic scenario. Taylor (19) originally described the species *A. subsalsum* in  
109 CM4's range – the Lake Alchichica area – using a field-caught, metamorphosed  
110 individual as the type specimen and paedomorphic/aquatic individuals to fill out the  
111 type series. Later, Brandon et al. (20) made two taxonomic changes: (1) all  
112 metamorphic individuals assigned to the name *A. subsalsum* were synonymized with  
113 *A. tigrinum velasci* Green 1825 (21) (= *A. velasci*), and (2) the aquatic individuals in  
114 Lake Alchichica were assigned to a new species name, *A. taylori* Brandon et al. 1981  
115 (20). However, as explained in the main text, our results showed a single genetic  
116 group in the Cuenca Oriental region made up of both *A. taylori* and *A. velasci*. Our  
117 results therefore appear to support Taylor's original decision to describe *A. subsalsum*  
118 from the Alchichica area using both metamorphic and paedomorphic/aquatic  
119 individuals in the type series. Despite this finding, we cannot rule out the possibility

120 that this lineage also occurred (and still occurs) in the vicinity of Mexico City, where  
121 *A. velasci* is described from and has taxonomic priority. Evidence exists for two  
122 species of *Ambystoma* occurring in the Xochimilco area of Mexico City (22–25). We  
123 therefore recommend use of the name *A. velasci* Green 1825 (21) for this other  
124 species and suggest follow-up studies be done to locate transformed individuals in the  
125 vicinity of Mexico City and to verify overall distribution. Attempts could also be  
126 made to extract DNA from the type series of *A. velasci* to verify the genetic  
127 distinctiveness of those individuals from the Mexico City area. If specimens from the  
128 type series of *A. velasci* turn out to be genetically indistinguishable from *A.*  
129 *mexicanum*, which is also known to transform occasionally, *A. velasci* should be  
130 synonymized with *A. mexicanum* and the name *A. subsalsum* would have priority for  
131 the other CM4 lineage. We continue to recognize that the aquatic Alchichica  
132 population is unique in being adapted to levels of salinity that most amphibians would  
133 not be able to tolerate (9, 26); thus, we recommend a subspecific epithet (*A. velasci*  
134 *taylori*) for individuals in this lake.

135 Notably, across all analyses of central Mexico, we identified one individual  
136 that was collected well outside the range of its assigned group. DWW-3104 was  
137 assigned to the CM3/*A. bombypellum* group, yet was collected more than 200  
138 kilometers east of its expected range, instead falling within the range of CM4/*A.*  
139 *velasci*. While we cannot fully explain this result, we do not believe that individuals  
140 from CM3 commonly occur at this outlier locality. Throughout central Mexico, wild  
141 salamanders are sold in local markets as food, bait, or aquarium pets and are  
142 sometimes moved from one area to another (27). Our outlier individual could be the  
143 result of such an introduction or could represent an error in specimen labeling or data  
144 transcription during the collection or lab-work stages.

145 Within the U.S. and northern Mexico, we recommend relatively few changes  
146 to the current taxonomy. Across the U.S. and Canada, as many as six taxa (species  
147 and subspecies) are currently recognized. If one were to assign taxonomic names  
148 corresponding to the eastern, central, and Rocky Mountain clades we recovered, these  
149 would be *Ambystoma tigrinum* Green 1825 (21), *A. mavortium mavortium* Baird 1850  
150 (28), and *A. m. nebulosum* Hallowell 1853 (29), respectively. We agree with other  
151 recent authors that *A. mavortium* should continue to be considered a full species (it  
152 was resurrected from synonymy with *A. tigrinum*; 21), especially in light of our  
153 phylogenetic results which do not always recover *A. mavortium* + *A. tigrinum* as a  
154 monophyletic group. Furthermore, *Ambystoma tigrinum* and *A. mavortium* have  
155 several phenotypic and life history differences (30, 31), including a greater proportion  
156 of paedomorphic individuals in *A. mavortium*. We also found evidence that *A. m.*  
157 *nebulosum* should continue to be recognized as a valid subspecies, as it forms a  
158 monophyletic group and it occupies a somewhat distinct high-elevation habitat,  
159 despite showing substantial admixture with the remaining individuals from the *A.*  
160 *mavortium* cluster. However, we found limited evidence for other described  
161 subspecies. Future work using genetic data specifically suited for fine-scale  
162 population genetics will be needed to determine the validity and geographic ranges of  
163 *A. m. stebbinsi*, *A. m. diaboli*, and *A. m. melanostictum*.

164 The two groups recovered in our northern Mexico analyses most likely  
165 correspond to *A. rosaceum* Taylor 1941 (32) and *A. silvense* Webb 2004 (33), but as  
166 we were not able to collect any individuals directly from the type locality of *A.*  
167 *silvense*, we cannot be certain in that assignment. Salamanders are also thought to  
168 occur throughout northern Mexico in the areas directly east of our sampling range  
169 (e.g., see range maps for *A. tigrinum* and *A. velasci* at iucnredlist.org); however,

170 without having genetic data from individuals in that region, we cannot pinpoint where  
171 the geographic boundaries of the north Mexican taxa lie, nor where the most  
172 admixture is occurring. Notably, Webb (33) used the name *A. subsalsum* for several  
173 specimens from eastern Durango and other parts of the Mexican Plateau (albeit  
174 “provisionally,” p. 126); however, we do not believe that the name *A. subsalsum*  
175 should be associated with any specimens collected in that region. See the paragraph  
176 related to CM4 above for our discussion of the name *A. subsalsum*.

177

178 *Generation of sequence data for phylogenetic outgroups.*

179 We retrieved sequence data from two outgroup taxa (*A. talpoidium* and *A.*  
180 *opacum*) using whole genome data published by Hime et al. (34). The de novo  
181 genome assemblies were set as custom BLAST (NCBI) databases in Geneious v.6.1.8  
182 (35), and orthologous loci were retrieved by searching the custom databases for the 92  
183 probe sequences used in this study. All search hits longer than 100 nucleotides with >  
184 80% similarity were pulled from the assembly data, aligned as described in the main  
185 text, and trimmed to match the sequence length of the remaining data matrix.

186 Two additional outgroup individuals (DWW3233 and DWW2561) were  
187 sequenced with the primary dataset. At the time of collection these individuals were  
188 presumed to belong to the tiger salamander species complex, but preliminary results  
189 revealed them to be genetically distinct; thus, we sequenced a mitochondrial  
190 barcoding gene [NADH dehydrogenase subunit 2 (ND2)] to confirm species identity.  
191 Amplifications were performed in 30  $\mu$ L reactions containing amplification buffer,  
192 Taq polymerase, dNTPs, purified water, template DNA, forward primer L4437 (5'-  
193 AAGCTTTCGGGCCCATACC-3'), and reverse primer H5692 (5'-  
194 GCGTTTAGCTGTAACTAAA-3'). PCR thermal cycling conditions were initial  
195 denaturation at 94 °C for 3 min, followed by 30 cycles of 94°C for 30 s, 50°C for 45  
196 s, and 72°C for 90 s, and a final extension of 72 °C for 5 min. Aliquots of the PCR  
197 products were electrophoresed and visualized on 1% agarose gels, and were purified  
198 and sequenced by Eurofins Genomics (Louisville, Kentucky, USA). The resulting  
199 ND2 sequences were compared to sequences in the NCBI BLAST database  
200 (<http://blast.ncbi.nlm.nih.gov/Blast.cgi>). The taxonomic identity of DWW3233  
201 matched *A. texanum* with  $\geq 99\%$  sequence similarity, while DWW2561 matched *A.*  
202 *opacum* with  $\geq 99\%$  similarity.

203

## 204 **Supplementary References**

205

- 206 1. K. Winker, Chapter 1: Subspecies represent geographically partitioned  
207 variation, a gold mine of evolutionary biology, and a challenge for  
208 conservation. *Ornithol. Monogr.* **67**, 6–23 (2010).
- 209 2. E. Sanford, M. W. Kelly, Local Adaptation in Marine Invertebrates. *Ann. Rev.*  
210 *Mar. Sci.* **3**, 509–535 (2011).
- 211 3. R. I. Colautti, J. A. Lau, Contemporary evolution during invasion: evidence for  
212 differentiation, natural selection, and local adaptation. *Mol. Ecol.* **24**, 1999–  
213 2017 (2015).
- 214 4. V. Ravigné, U. Dieckmann, I. Olivieri, Live where you thrive: joint evolution  
215 of habitat choice and local adaptation facilitates specialization and promotes  
216 diversity. *Am. Nat.* **174**, E141-69 (2009).
- 217 5. H. H. Whiteman, Evolution of facultative paedomorphosis in salamanders. *Q.*  
218 *Rev. Biol.* **69**, 205–221 (1994).
- 219 6. A. A. Dugès, *Description d'un axolotl des montagnes de las cruces*

- 220 (Amblystoma [*sic*] altamirani, A. Dugès) (Imprimerie du Ministère de  
 221 “Fomento,” 1895).
- 222 7. E. H. Taylor, Herpetological novelties from Mexico. *Univ. Kansas Sci. Bull.*  
 223 **29**, 343–358 (1943).
- 224 8. E. H. Taylor, A new *Rhyacosiredon* (Caudata) from Western Mexico.  
 225 *Herpetologica* **1**, 171–176 (1940).
- 226 9. E. H. Taylor, New salamanders from Mexico with a discussion of certain  
 227 known forms. *Univ. Kansas Sci. Bull.* **26**, 407–439 (1939).
- 228 10. E. H. Taylor, A new ambystomid salamander from the Plateau Region of  
 229 Mexico. *Univ. Kansas Sci. Bull.* **30**, 57–61 (1944).
- 230 11. J. Dixon, A new species of salamander of the genus *Ambystoma* from Jalisco,  
 231 Mexico. *Copeia* **1**, 99–101 (1963).
- 232 12. S. Krebs, R. Brandon, A new species of salamander (family Ambystomatidae)  
 233 from Michoacan, Mexico. *Herpetologica* **40**, 238–245 (1984).
- 234 13. A. A. Dugès, Una nueva especie de ajolote de la Laguna de Patzcuaro. *La Nat.*  
 235 **1**, 241–244 (1870).
- 236 14. R. A. Brandon, Spontaneous and induced metamorphosis of *Ambystoma*  
 237 *dumerilii* (Dugès), a paedogenetic Mexican salamander, under laboratory  
 238 conditions. *Herpetologica* **32**, 429–438 (1976).
- 239 15. D. W. Weisrock, H. B. Shaffer, B. L. Storz, S. R. Storz, S. R. Voss, Multiple  
 240 nuclear gene sequences identify phylogenetic species boundaries in the rapidly  
 241 radiating clade of Mexican ambystomatid salamanders. *Mol. Ecol.* **15**, 2489–  
 242 2503 (2006).
- 243 16. P. M. Hime, *et al.*, The influence of locus number and information content on  
 244 species delimitation: An empirical test case in an endangered Mexican  
 245 salamander. *Mol. Ecol.* **25**, 5959–5974 (2016).
- 246 17. J. D. Anderson, R. D. Worthington, The life history of the Mexican salamander  
 247 *Ambystoma ordinarium* Taylor. *Herpetologica* **27**, 165–176 (1971).
- 248 18. G. Shaw, F. Nodder, *The Naturalist’s Miscellany; or Coloured Figures of*  
 249 *Natural Objects Drawn and Described Immediately from Nature*, 9th Ed.  
 250 (Nodder & Co., 1798).
- 251 19. E. H. Taylor, A New Ambystomid Salamander Adapted to Brackish Water.  
 252 *Copeia* **1943**, 151 (1943).
- 253 20. R. Brandon, E. Maruska, W. Rumph, A new species of neotenic *Ambystoma*  
 254 (Amphibia, Caudata) endemic to Laguna Alchichica, Puebla, Mexico. *Bull.*  
 255 *South. Calif. Acad. Sci.* **80**, 112–125 (1981).
- 256 21. J. Green, Description of a new species of salamander. *J. Acad. Nat. Sci.* **5**, 116–  
 257 118 (1825).
- 258 22. H. M. Smith, R. B. Smith, “Analysis of the literature on the Mexican axolotl”  
 259 in *Synopsis of the Herpetofauna of Mexico*, v. 1, (E. Lundberg, 1971), pp. 1–  
 260 245.
- 261 23. R. A. Brandon, “Natural history of the axolotl and its relationship to other  
 262 ambystomatid salamanders” in *Developmental Biology of the Axolotl*, J. B.  
 263 Armstrong, G. M. Malacinski, Eds. (Oxford University Press, 1989), pp. 13–  
 264 21.
- 265 24. H. M. Smith, The Mexican axolotl: some misconceptions and problems.  
 266 *Bioscience* **19**, 593–615 (1969).
- 267 25. J. M. Velasco, Anotaciones y observaciones al trabajo del Señor Augusto  
 268 Weismann sobre la transformacion del ajolote Mexicano en *Amblystoma*. *La*  
 269 *Nat.* **5**, 58–84 (1880).

- 270 26. V. Shoemaker, K. A. Nagy, Osmoregulation in amphibians and reptiles. *Annu.*  
271 *Rev. Physiol.* **39**, 449–471 (1977).
- 272 27. J. McKay, “An evaluation of captive breeding and sustainable use of the  
273 Mexican axolotl (*Ambystoma mexicanum*),” University of Kent, Canterbury,  
274 UK. (2003) (January 20, 2020).
- 275 28. S. Baird, Revision of the North American Tailed-Batrachia with descriptions of  
276 new genera and species. *J. Acad. Nat. Sci. Philadelphia* **2**, 281–294 (1850).
- 277 29. E. Hallowell, On some new reptiles from California. *Proc. Natl. Acad. Sci.*  
278 *Philadelphia* **6**, 236–238 (1853).
- 279 30. D. Irschick, H. Shaffer, The polytypic species revisited: morphological  
280 differentiation among tiger salamanders (*Ambystoma tigrinum*)(Amphibia:  
281 Caudata). *Herpetologica* **53**, 30–49 (1997).
- 282 31. E. R. Dunn, The races of *Ambystoma tigrinum*. *Copeia* **1940**, 154–162 (1940).
- 283 32. E. H. Taylor, Two new ambystomid salamanders from Chihuahua. *Copeia* **3**,  
284 143–146 (1941).
- 285 33. R. Webb, Observations on tiger salamanders (*Ambystoma tigrinum* complex,  
286 family Ambystomatidae) in Mexico with description of a new species. *Bull.*  
287 *Maryl. Herpetol. Soc.* **40**, 122–143 (2004).
- 288 34. P. M. Hime, *et al.*, Phylogenomics reveals ancient gene tree discordance in the  
289 amphibian tree of life. *Syst. Biol.* (2020) <https://doi.org/10.1093/sysbio/syaa034>  
290 (May 12, 2020).
- 291 35. M. Kearse, *et al.*, Geneious Basic: An integrated and extendable desktop  
292 software platform for the organization and analysis of sequence data.  
293 *Bioinformatics* **28**, 1647–1649 (2012).
- 294  
295  
296



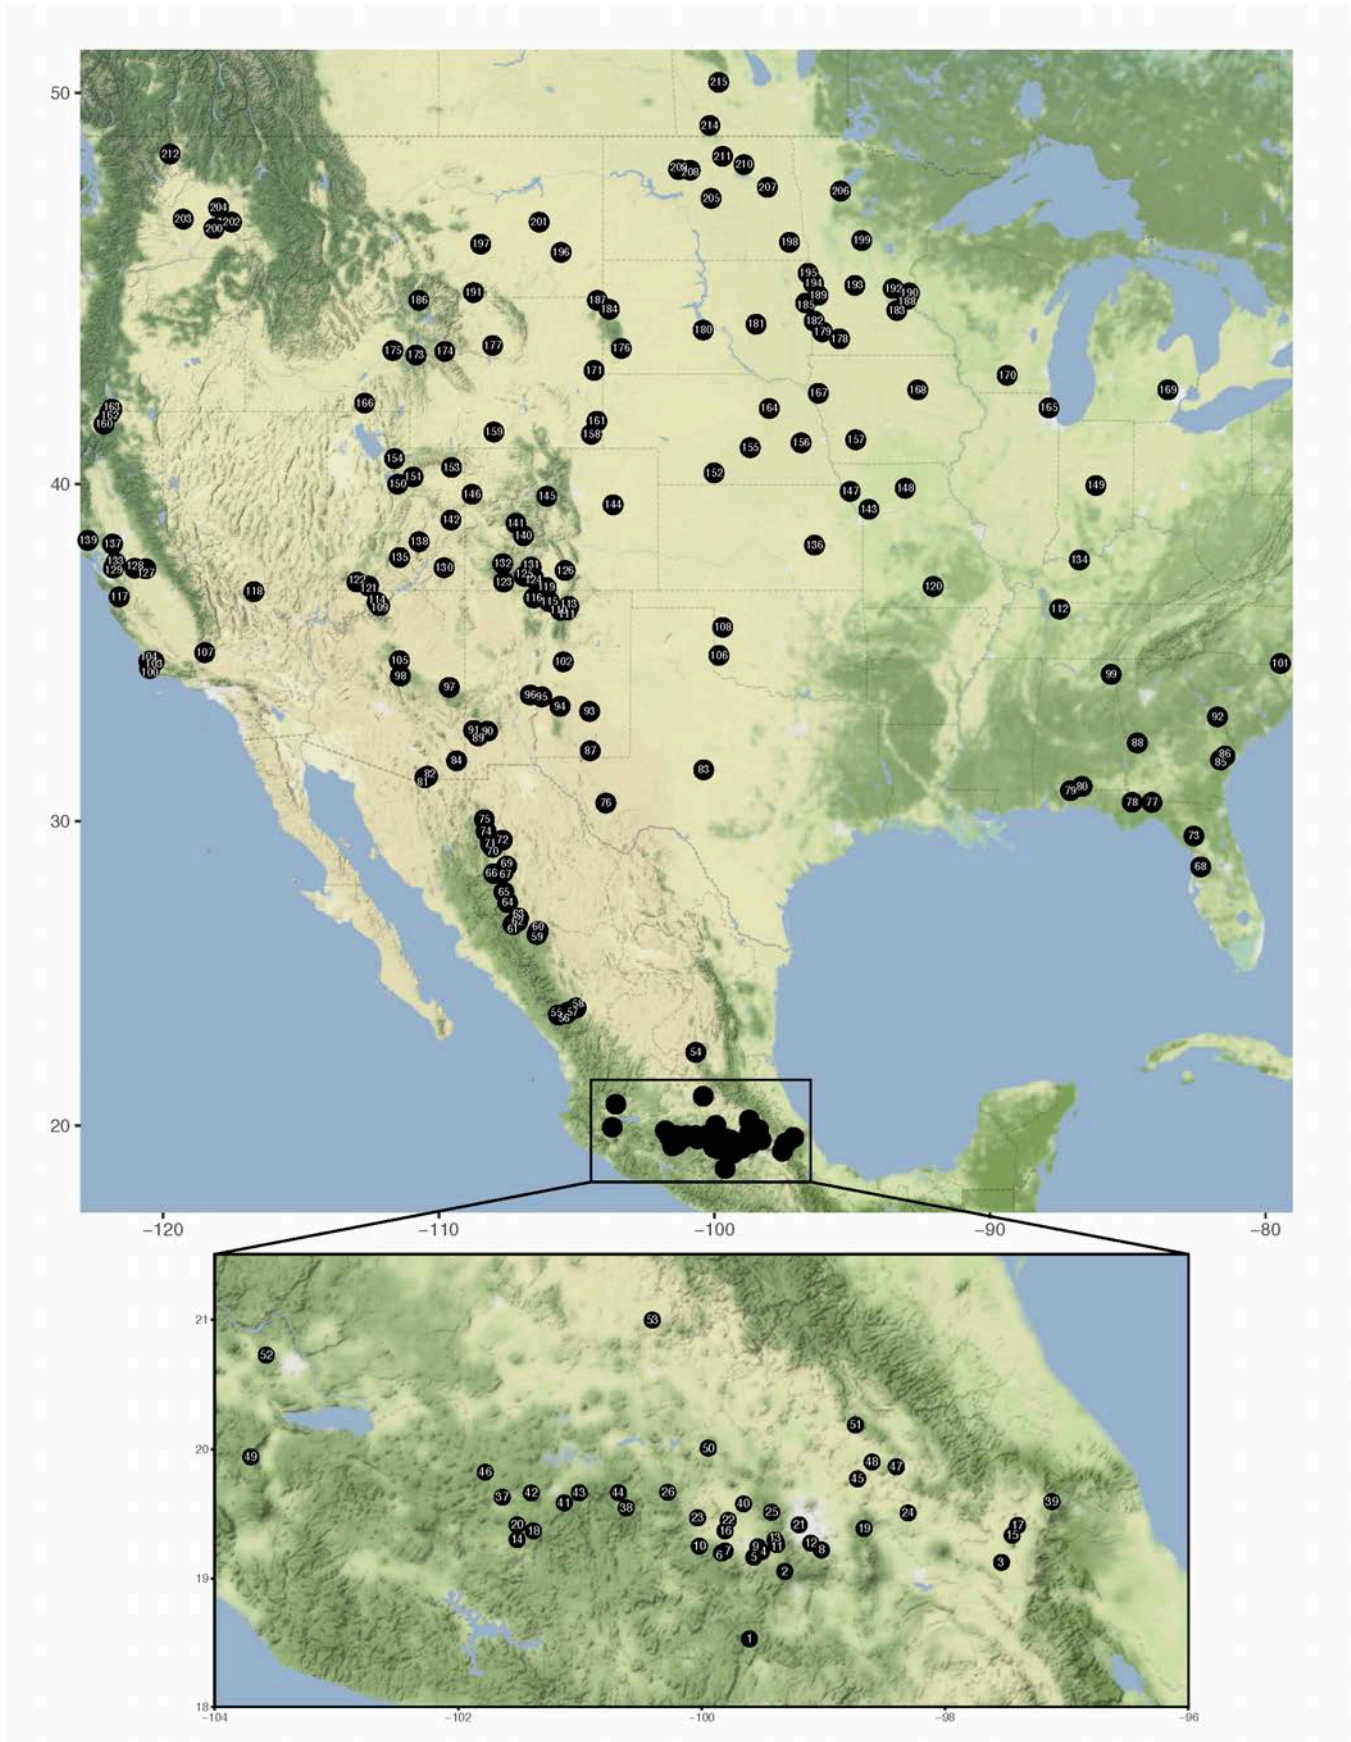

297  
 298 **Figure S1.** Map of collection localities. Numbers correspond to Table S1. The  
 299 zoomed box gives a detailed view of localities in the Trans-Mexican Volcanic Belt.



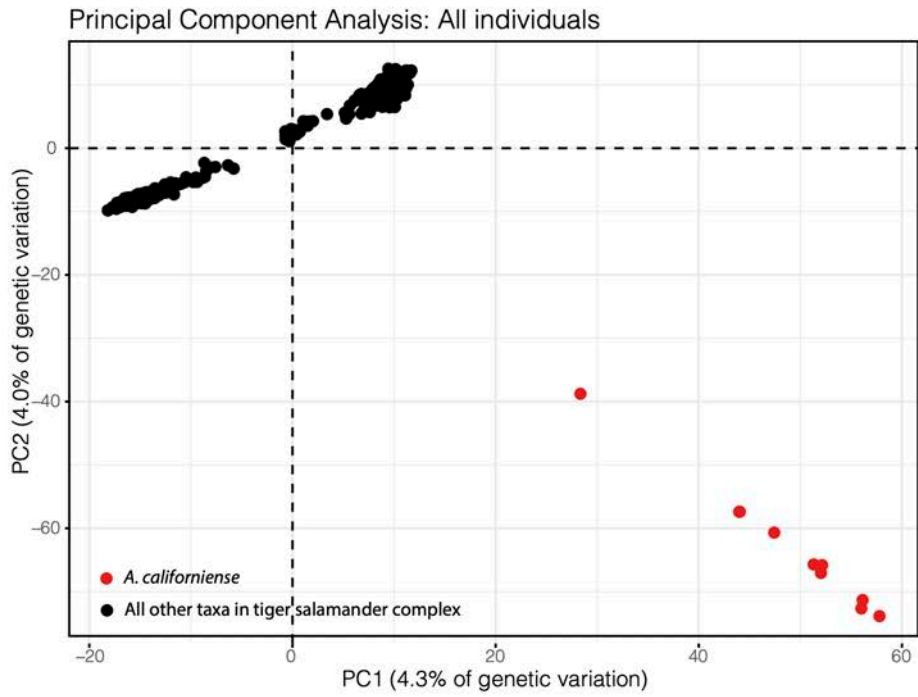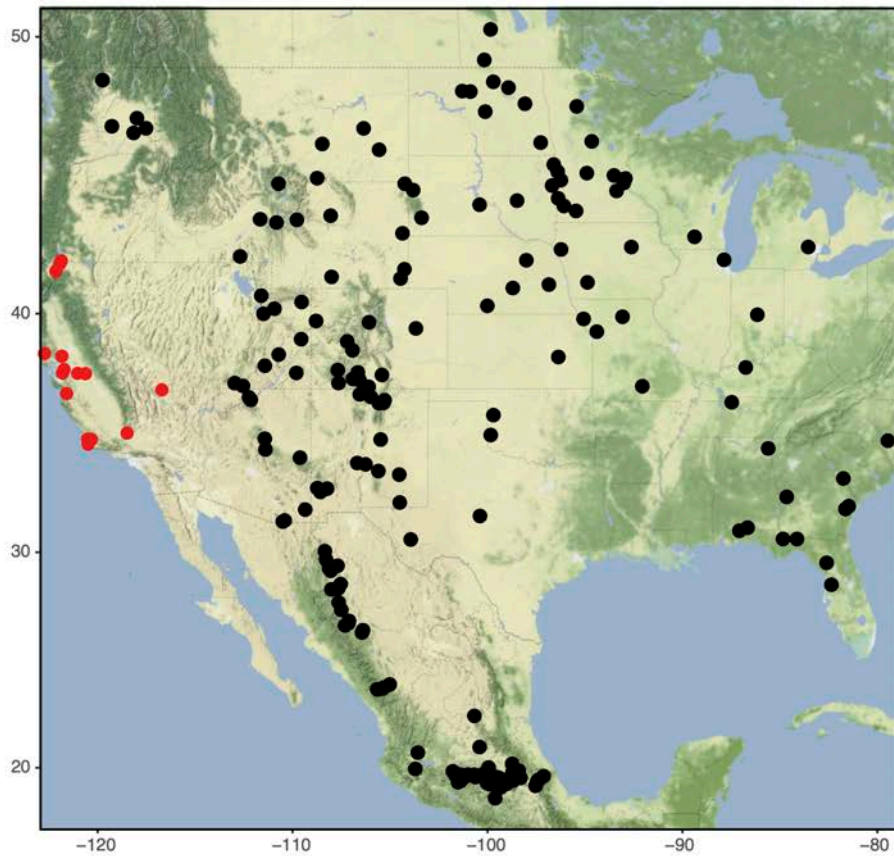

300  
 301 **Figure S2.** Results from the initial principal components (PC) analysis which used the  
 302 full genetic dataset (all individuals except outgroups). Top graph shows the first (x-  
 303 axis) and second (y-axis) principal components. Individuals of *A. californiense* are  
 304 shown as red dots on both the plot and the map below. All other individuals are black.

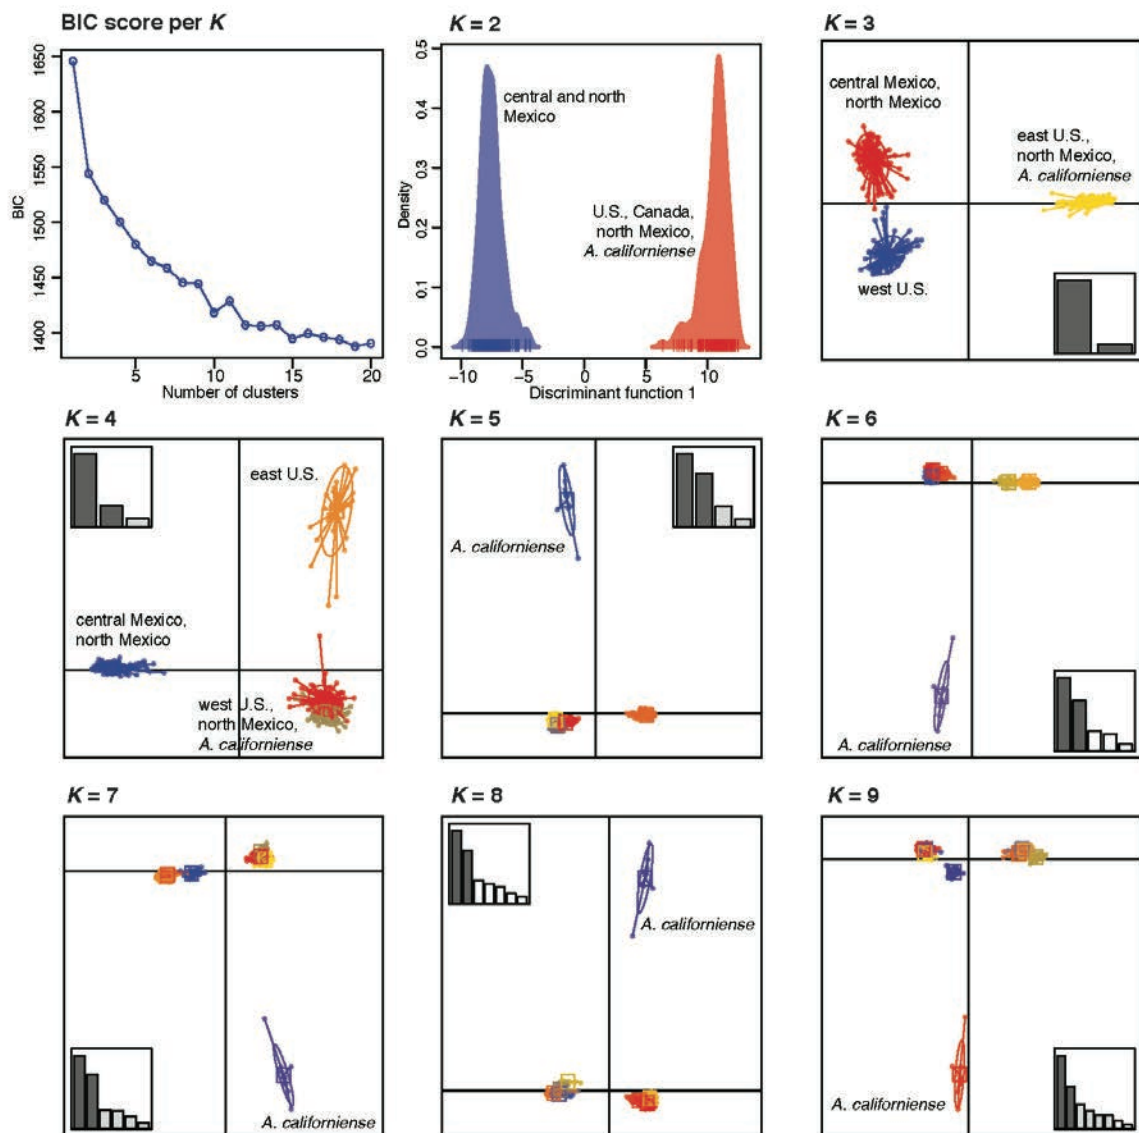

305  
 306 **Figure S3.** DAPC results from exploratory analyses of the full genetic dataset, which  
 307 included the California tiger salamander (*A. californiense*). The upper left plot shows  
 308 the BIC scores for each number of possible genetic clusters ( $K$ ). Remaining plots  
 309 show the first (x-axis) and/or second (y-axis) discriminant functions for various  
 310 values of  $K$ . Barplots of discriminant function eigenvalues are inset on each  
 311 scatterplot. Note that all plots stabilize starting at  $K = 5$  in recovering a distinct cluster  
 312 representing all California tiger salamanders. This trend continued at higher values of  
 313  $K$ .  
 314

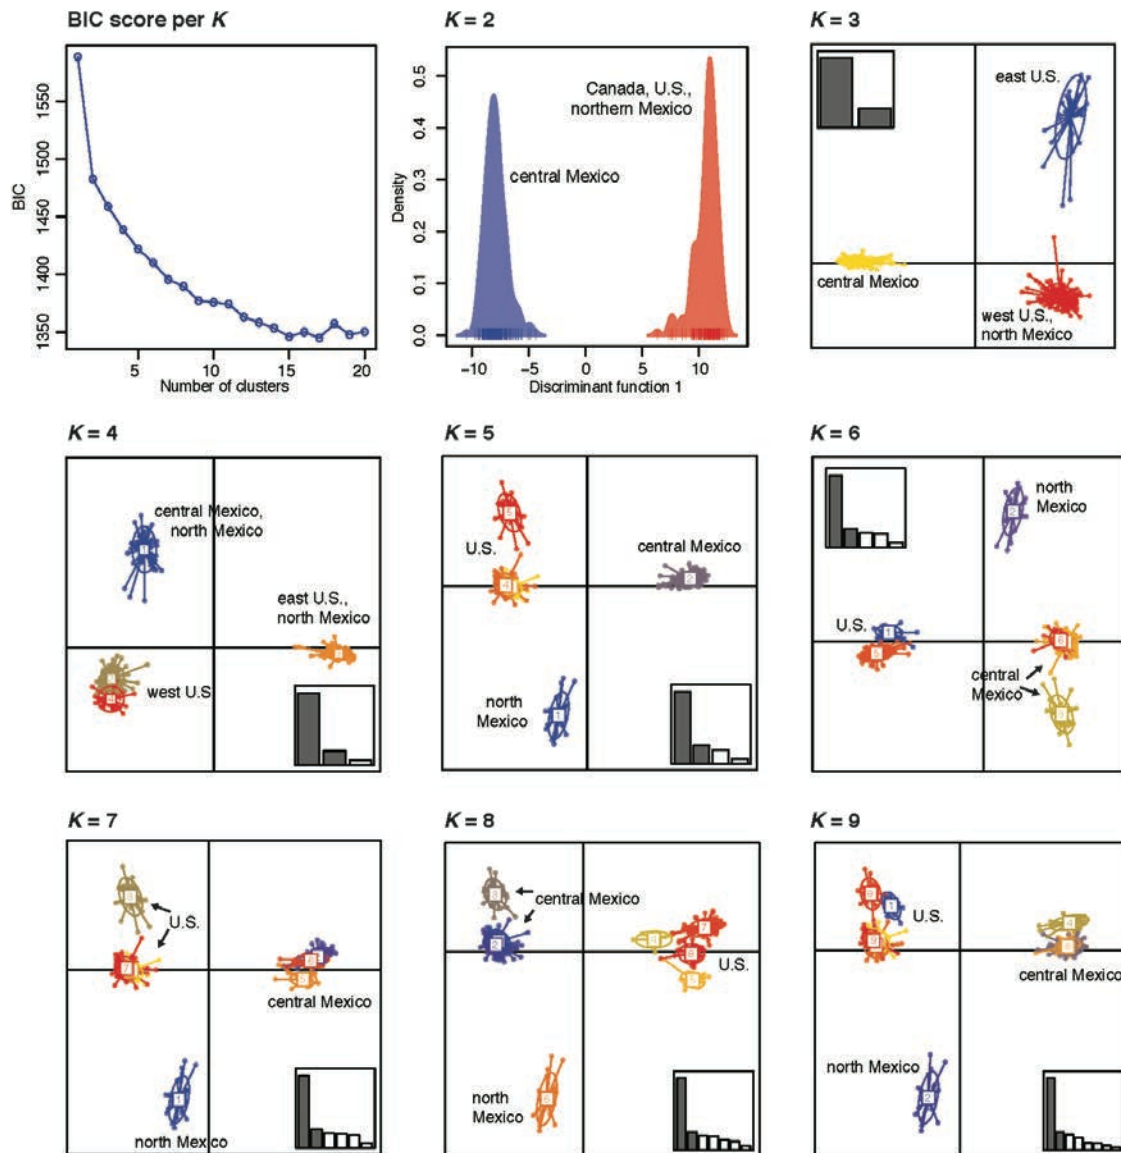

315  
 316 **Figure S4.** DAPC results from exploratory analyses of the tiger salamander complex  
 317 dataset with *A. californiense* removed. The upper left plot shows the BIC scores for  
 318 each number of possible genetic clusters ( $K$ ). Remaining plots show the first (x-axis)  
 319 and/or second (y-axis) discriminant functions for various values of  $K$ . Barplots of  
 320 discriminant function eigenvalues are inset on each scatterplot. Note that all plots  
 321 stabilize starting at  $K = 5$  in recovering three predominant genetic clusters  
 322 representing the U.S. + Canada, northern Mexico, and central Mexico. This trend  
 323 continued at higher values of  $K$ .  
 324

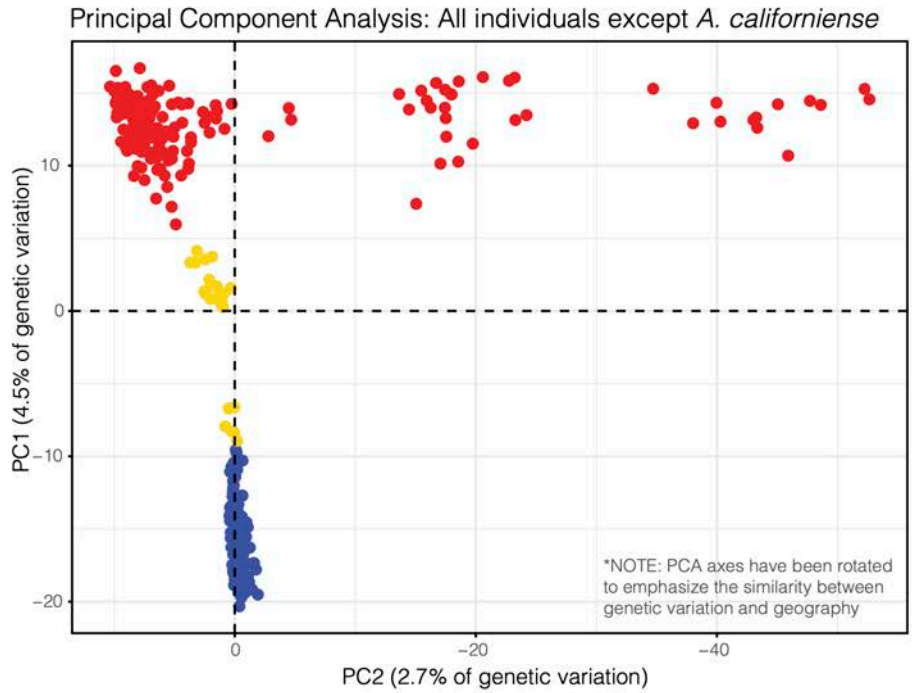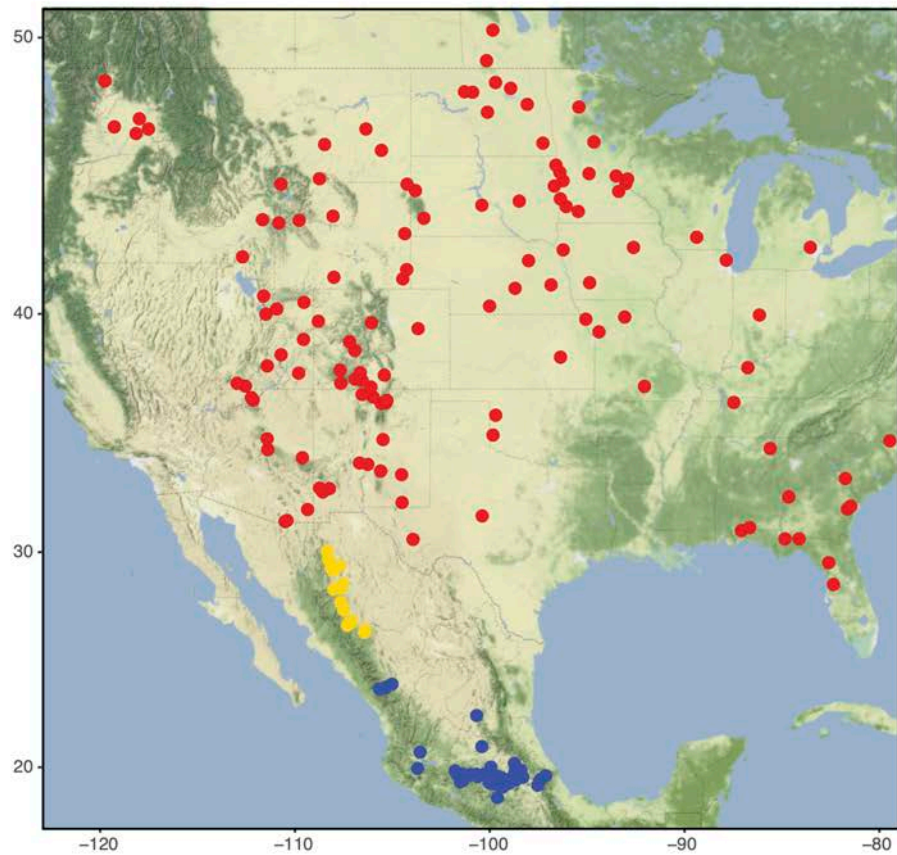

325  
326  
327  
328  
329

**Figure S5.** Results from the principal components (PC) analysis that included all individuals except outgroups and *A. californiense*. Top graph shows the first (x-axis) and second (y-axis) principal components. Individuals from central Mexico, northern Mexico, and the U.S. + Canada are colored blue, yellow, and red, respectively.



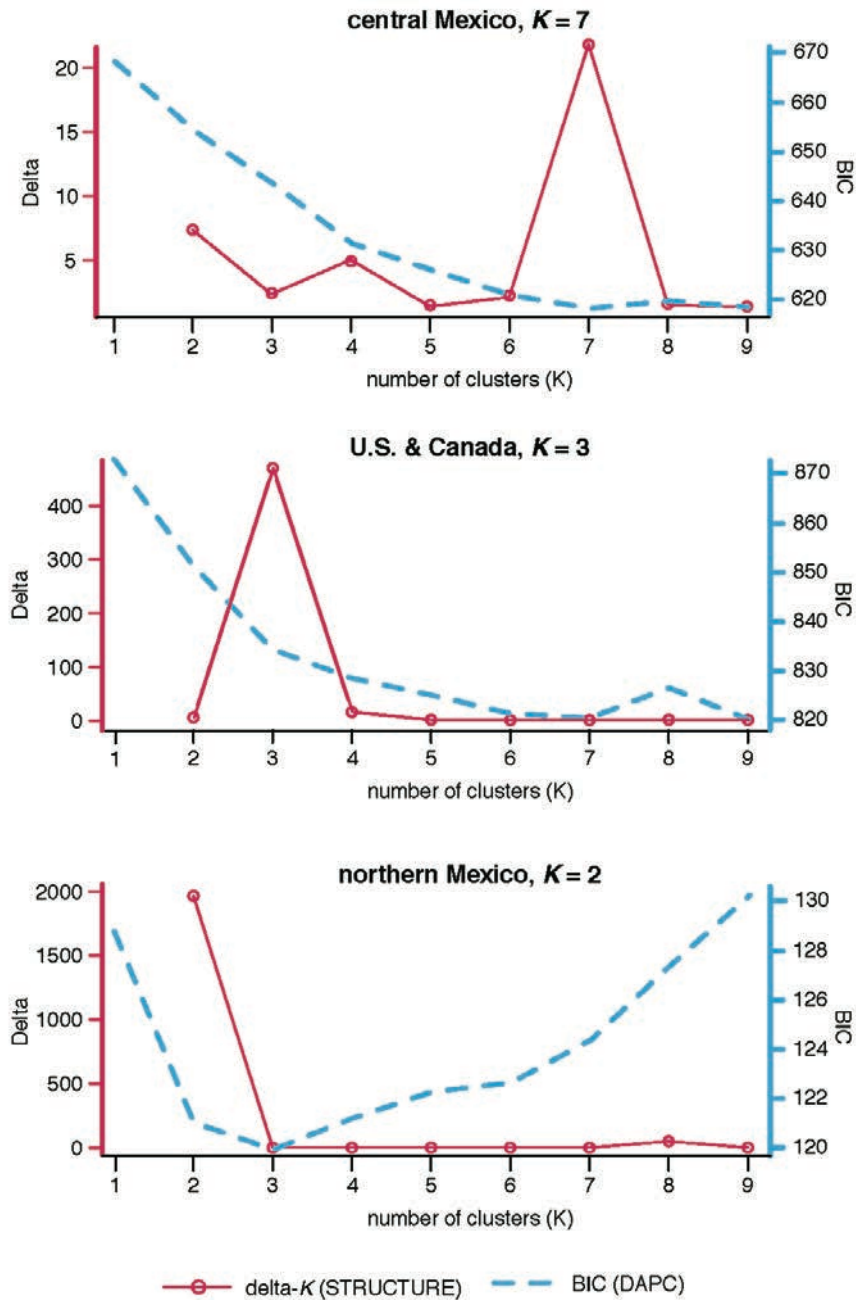

330  
 331  
 332  
 333  
 334  
 335  
 336  
 337  
 338

**Figure S6.** Plots used to determine the number of major clusters ( $K$ ) within the central Mexico, U.S., and north Mexico groups (top, middle, and bottom rows, respectively). The left column contains plots of delta- $K$ , calculated using the method of Evanno et al. (2006), used to determine the number of clusters in STRUCTURE analyses. The right column contains plots of BIC, used to determine the number of clusters in DAPC analyses. Membership plots and maps relating to these results are shown in Fig. 1.

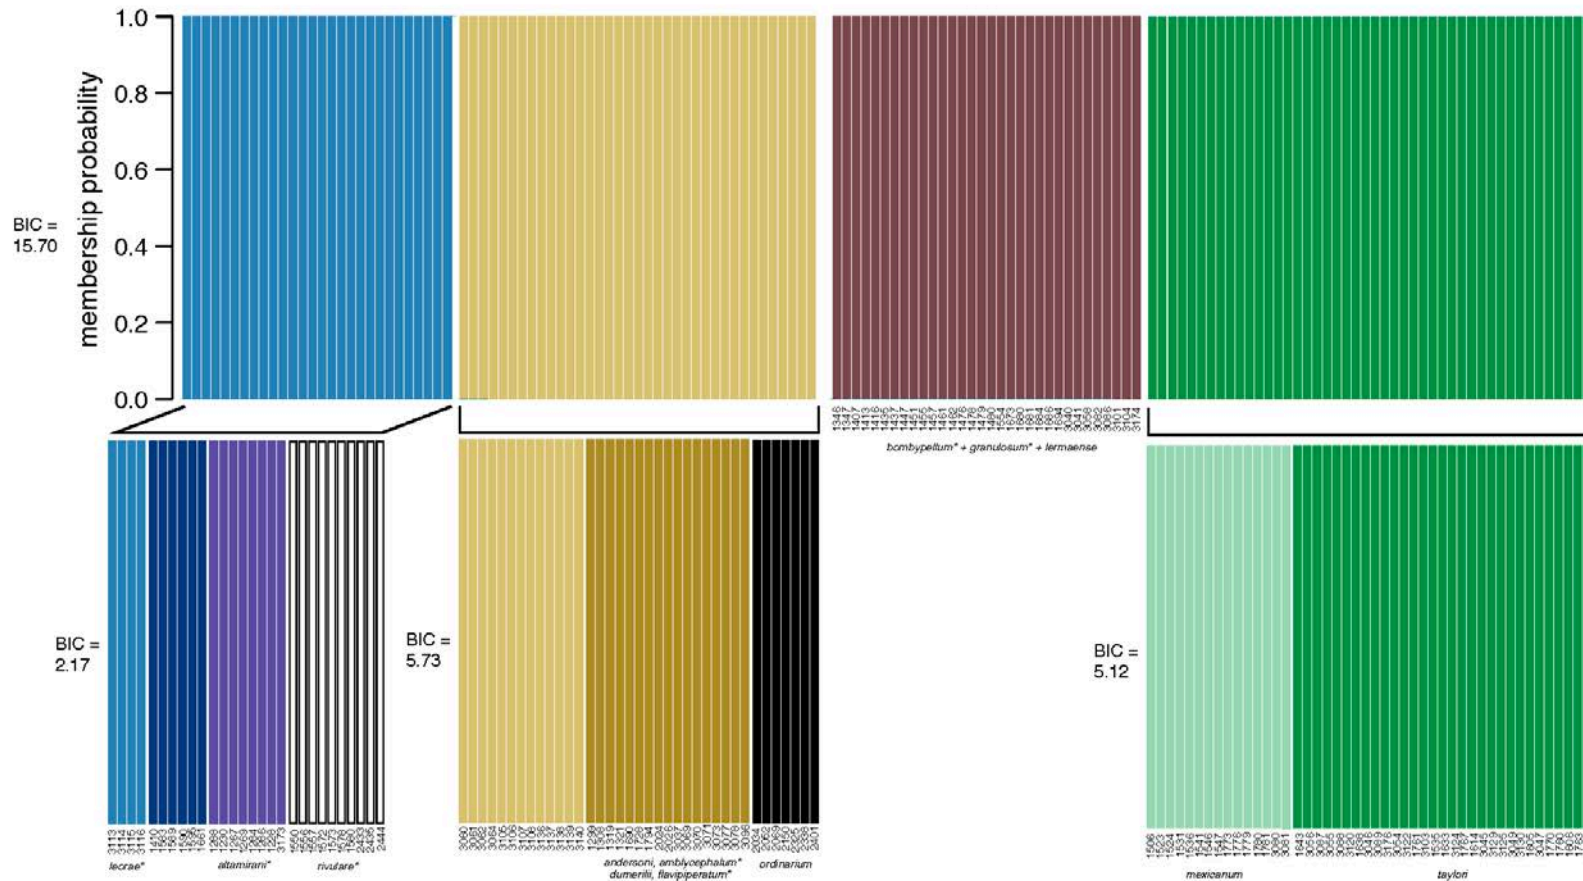

339 **Figure S7.** Results of discriminant analysis of principal components (DAPC) for the Central Mexico genetic subgroup. Recursive rounds of  
 340 DAPC analyses (indicated by brackets) were performed as described in the main text. Values of delta-BIC for each round are given to the left of  
 341 each membership plot. Note that no further rounds of analyses were conducted after the value of delta-BIC fell below 2. Taxonomic names listed  
 342 below some clusters are based on the presence of individuals collected from (or near, indicated by \*) the type locality of that species or  
 343 subspecies.

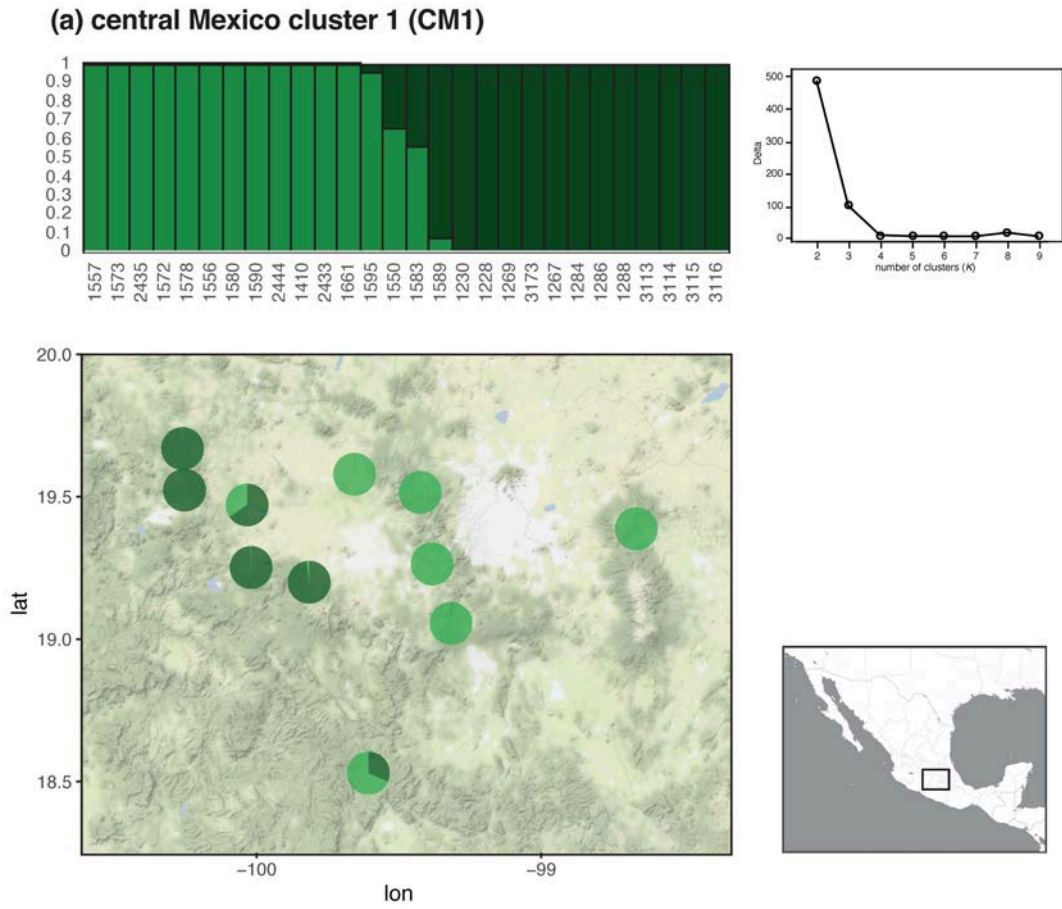

345  
 346  
 347  
 348  
 349  
 350  
 351  
 352

**Figure S8.** Detailed results from exploratory follow-up STRUCTURE analyses of (a) CM1, (b) CM2, (c) CM3, and (d) CM4 (see Fig. 1 for results from prior rounds of analyses). Each vertical bar represents an individual, while the y-axis gives the probability of group membership. Plots of  $\Delta(K)$ , calculated using the method of Evanno et al. (2006), are to the right of each membership plot.



(c) central Mexico cluster 2 (CM2)

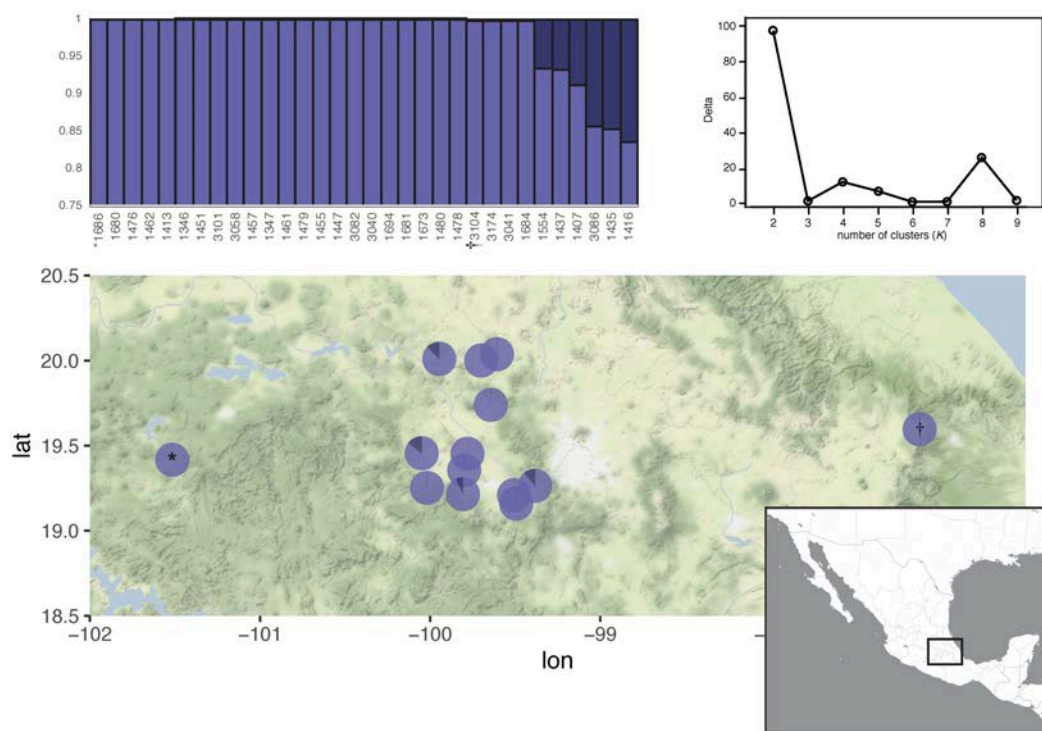

353  
354  
355  
356

**Figure S8 (continued).** Individuals 1686 (\*) and 3104(†) are range outliers that were not shown in Fig. 1 (see discussion in supplementary text).

**(b) central Mexico cluster 3 (CM3)**

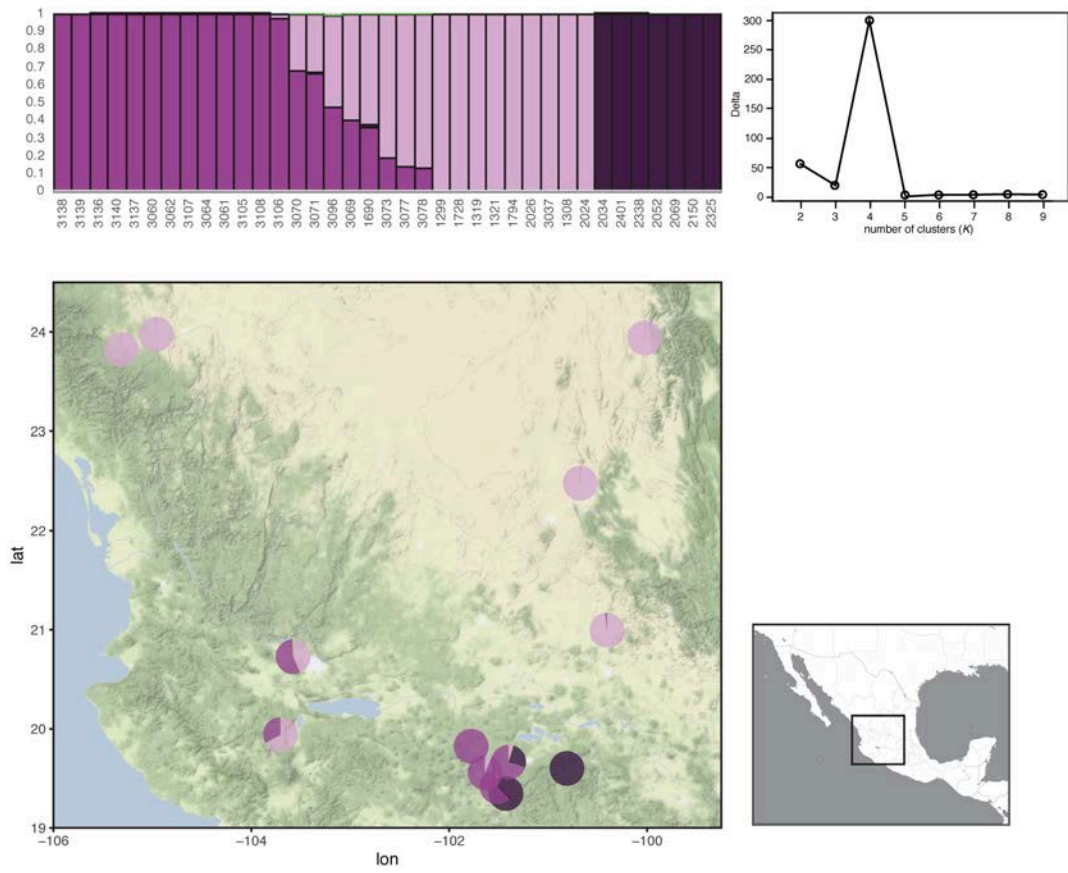

357

358 **Figure S8 (continued).**

(d) central Mexico cluster 4 (CM4)

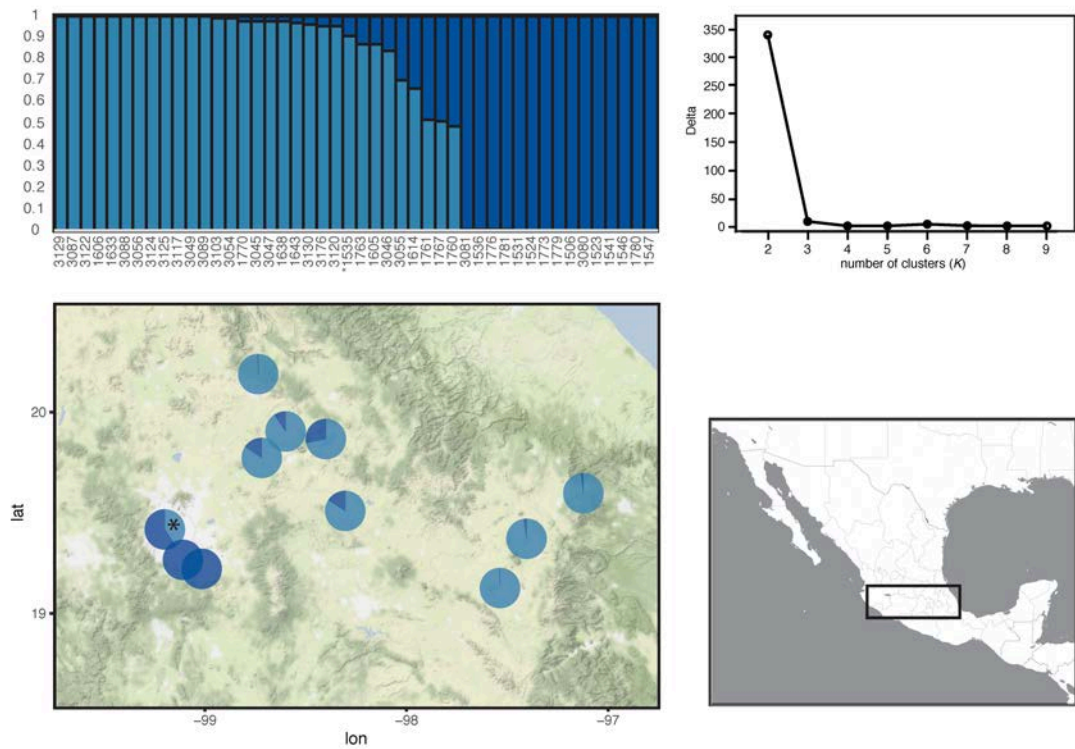

359  
360  
361  
362

**Figure S8 (continued).** Individual 1535(†) was collected from Chapultepec (a locality where only *A. mexicanum* was expected to occur) yet falls out in the major genetic cluster that includes *A. taylori* (lighter blue on the top STRUCTURE membership plot).

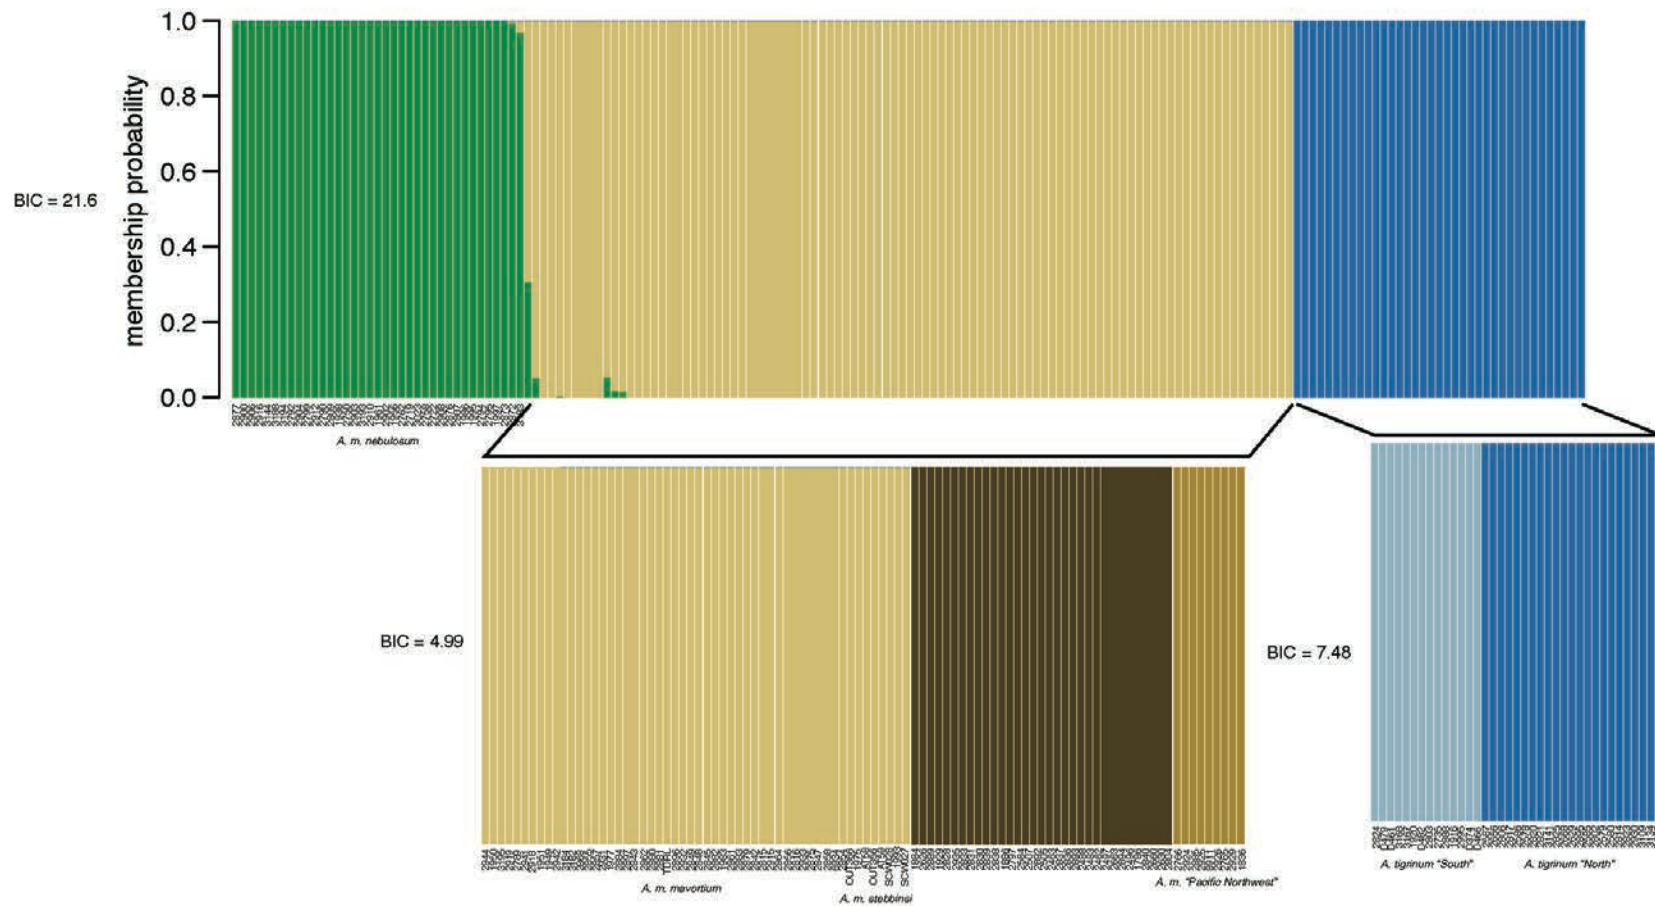

363 **Figure S9.** Results of discriminant analysis of principal components (DAPC) for the U.S. genetic subgroup. Recursive rounds of DAPC analyses  
 364 (indicated by brackets) were performed as described in the main text. Values of delta-BIC for each round are given to the left of each  
 365 membership plot. Note that no further rounds of analyses were conducted after the value of delta-BIC fell below 2. Taxonomic names listed  
 366 below some clusters are based on the presence of individuals collected from the type locality of that species or subspecies.

(a) U.S. Rocky Mountain group

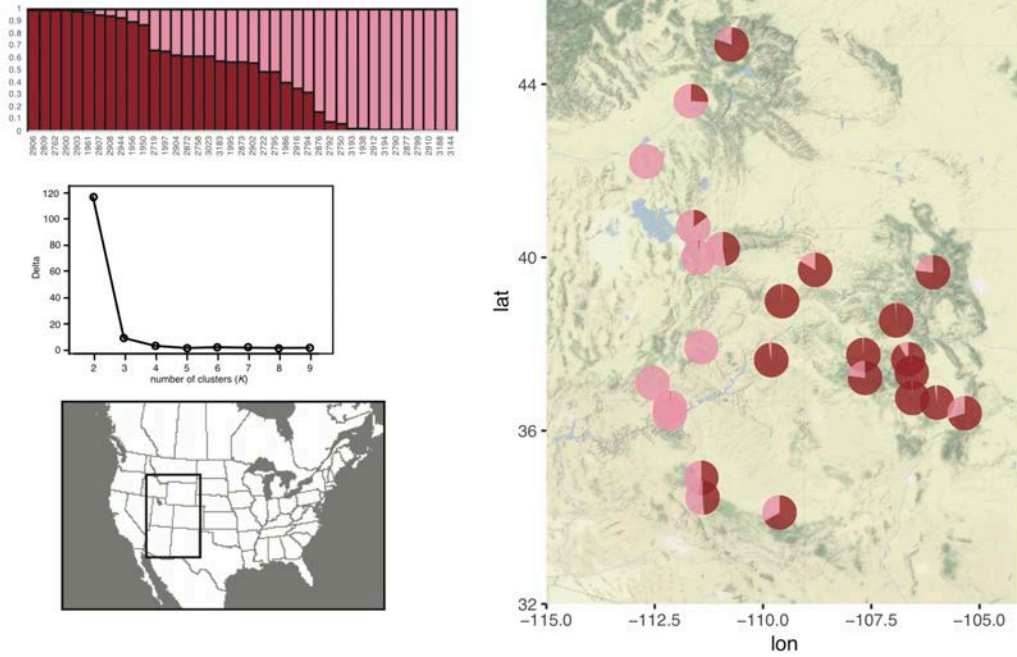

367  
368  
369  
370  
371  
372  
373  
374

**Figure S10.** Detailed results from exploratory follow-up STRUCTURE analyses of (a) U.S. Rocky Mountain group, (b) U.S. central group, and (c) U.S. eastern group (see Fig. 1 for results from the first round of analyses). Each vertical bar represents an individual, while the y-axis gives the probability of group membership. Plots of  $\Delta(K)$ , calculated using the method of Evanno et al. (2006), are also provided below each membership plot.

(b) U.S. central group

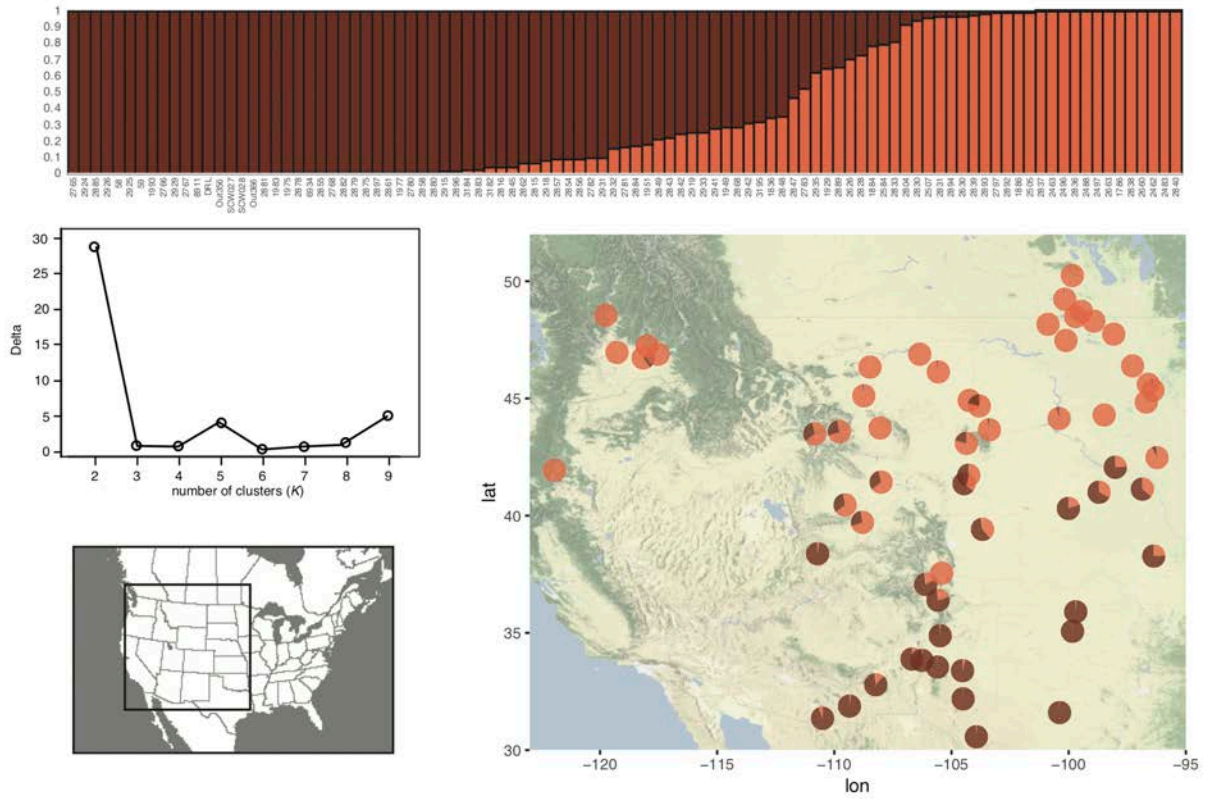

375 **Figure S10 (continued).**  
376  
377



(c) U.S. eastern group

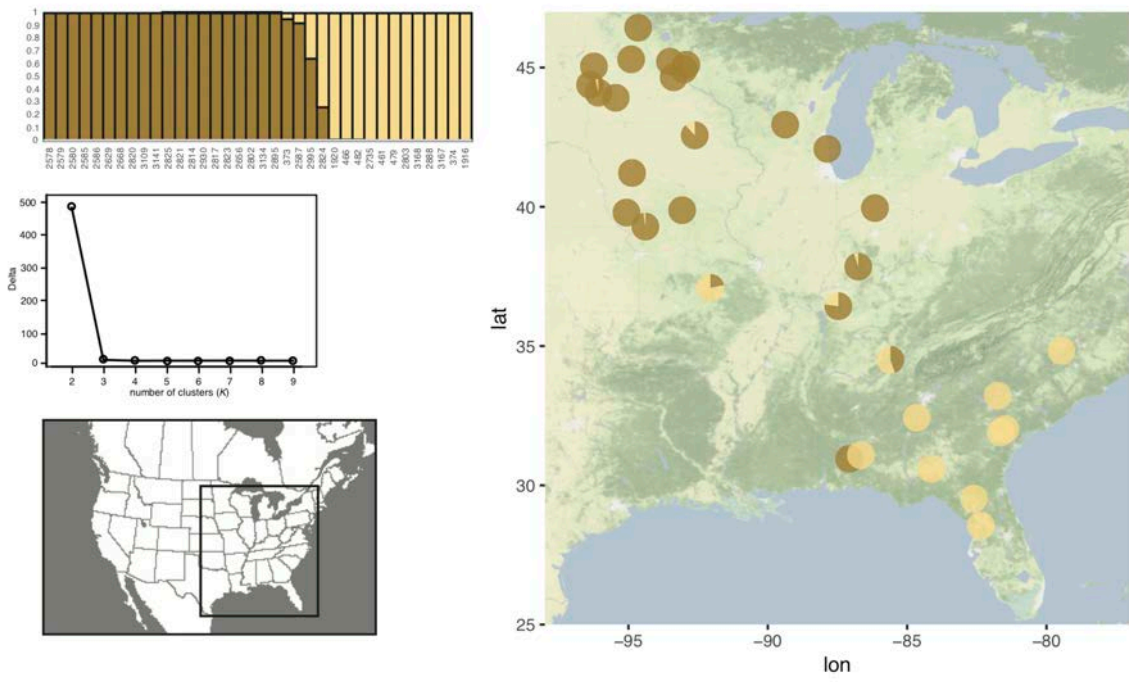

378  
379

Figure S10 (continued).



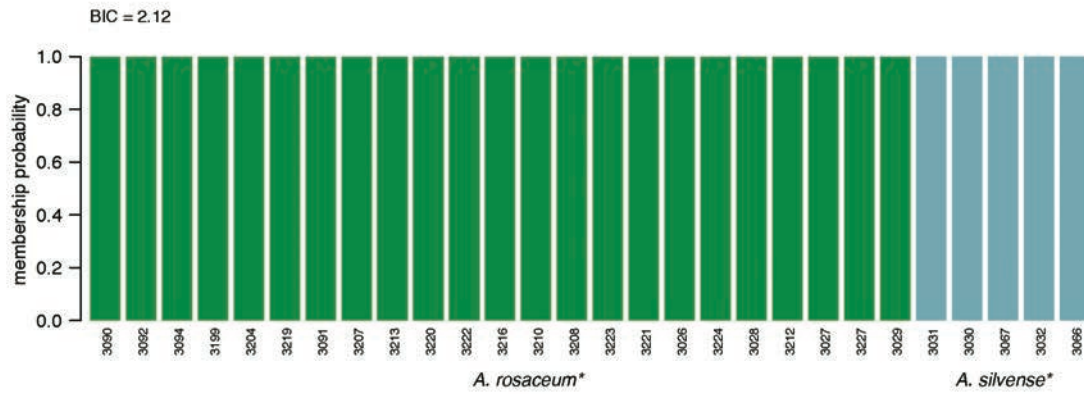

380 **Figure S11.** Results of discriminant analysis of principal components (DAPC) for the  
 381 northern Mexico genetic subgroup. Value of delta-BIC is given above the  
 382 membership plot. Note that no further rounds of analyses were conducted after the  
 383 value of delta-BIC fell below 2. Taxonomic names listed below clusters are based on  
 384 the presence of individuals collected from near (indicated by \*) the type locality of  
 385 that species or subspecies.  
 386  
 387

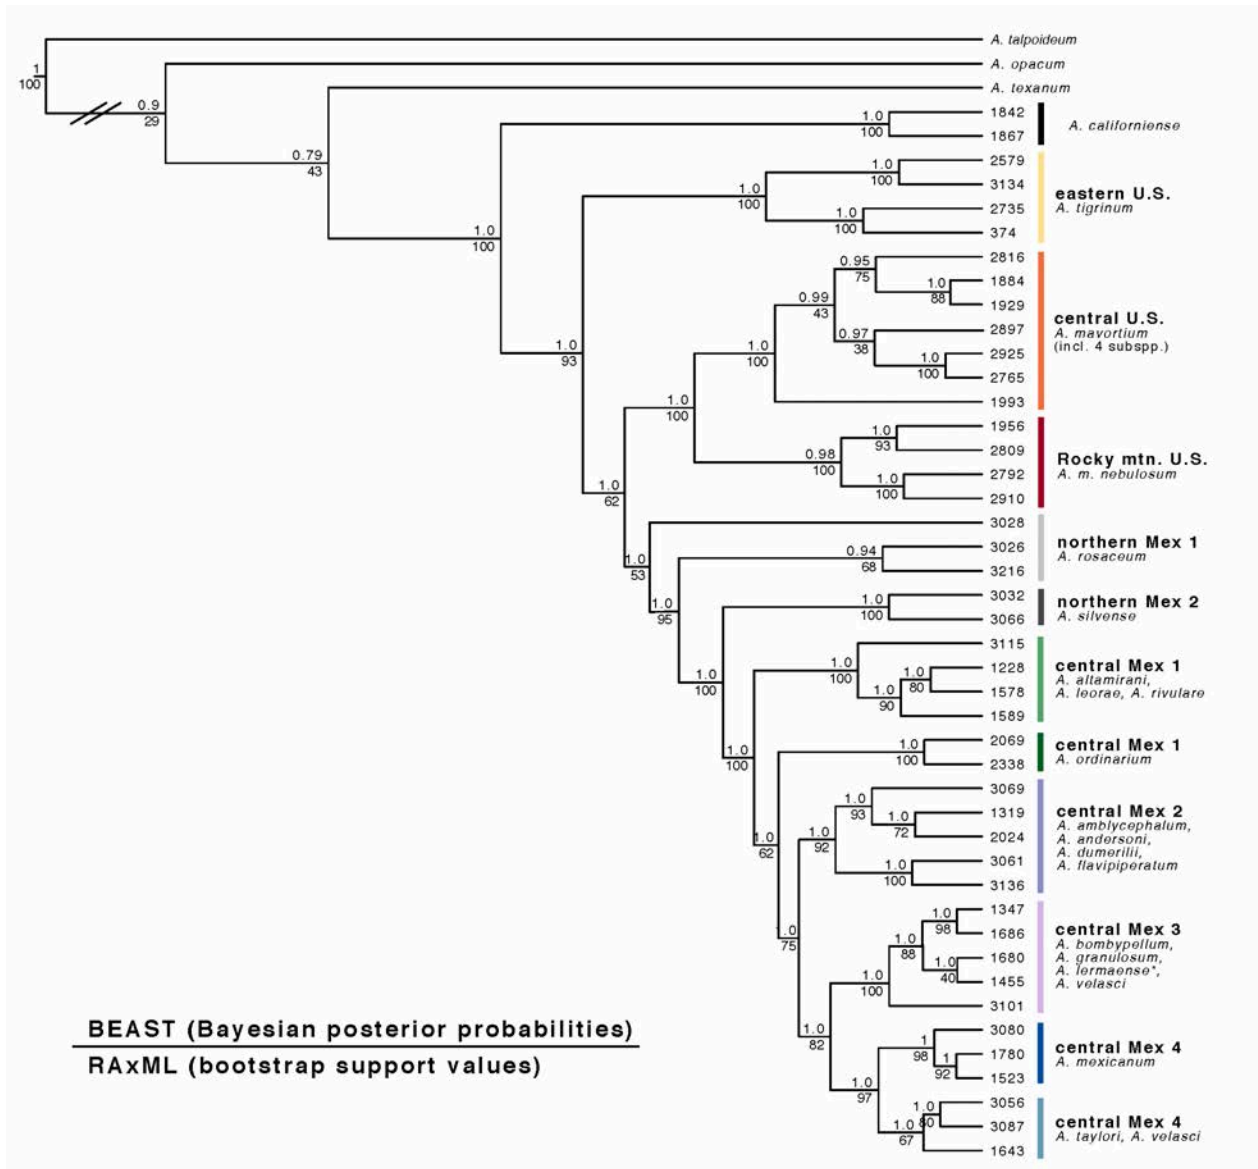

388  
 389 **Figure S12.** Results of concatenated phylogenetic analyses performed using the  
 390 Bayesian program BEAST and the maximum-likelihood program RAxML. Both  
 391 methods produced identical topologies. Bayesian posterior probabilities and bootstrap  
 392 support values are provided above and below each node, respectively. Branch lengths  
 393 were produced by BEAST. Colored clades correspond to the major genetic clusters  
 394 (and associated species) identified by population genetic analyses (Fig. 1).  
 395

396 **Table S1.** Lab IDs (DWW#), field numbers, taxonomic assignments, and locality  
397 information for specimens used in this study. This table is available on Figshare  
398 (<https://figshare.com/s/abb195a2464c55ddcc40>).  
399

400 **Table S2.** The number of filtered sequencing reads associated with each  
401 individual/locus combination. This table is available on Figshare  
402 (<https://figshare.com/s/9f3dd2cec2600234ca94>).

403 **Table S3.** Natural logarithms of Bézier-corrected marginal likelihoods (Bezier lnL), Bayes factors (BF), and model probabilities for each of the  
 404 models evaluated in migrate-n (described in Fig. 3). Each species and model set was evaluated using all facultatively paedomorphic localities in  
 405 the same clade (CM1-CM4). Top-ranking models have a BF of zero and are highlighted in gray.

| Paedomorphic Sp.    | No Migration Model |       |        | Unidirectional Model #1 |     |        | Unidirectional Model #2 |      |        | Full Migration Model |      |        | Panmictic Model |     |        |
|---------------------|--------------------|-------|--------|-------------------------|-----|--------|-------------------------|------|--------|----------------------|------|--------|-----------------|-----|--------|
|                     | Bezier lnL         | BF    | Prob.  | Bezier lnL              | BF  | Prob.  | Bezier lnL              | BF   | Prob.  | Bezier lnL           | BF   | Prob.  | Bezier lnL      | BF  | Prob.  |
| <i>A. andersoni</i> | -39606.76          | -15.3 | <0.01% | -39778.05               | 358 | <0.01% | -39618.77               | 39.3 | <0.01% | -39599.12            | 0    | 100%   | -39779.02       | 360 | <0.01% |
| <i>A. dumerilii</i> | -40482.11          | -877  | <0.01% | -40154.13               | 221 | <0.01% | -40077.95               | 69.1 | <0.01% | -40043.42            | 0    | 100%   | -40098.82       | 111 | <0.01% |
| <i>A. lermaense</i> | -39073.2           | -134  | <0.01% | -39071.82               | 131 | <0.01% | -39076.73               | -141 | <0.01% | -39072.59            | -132 | <0.01% | -39006.44       | 0   | 100%   |
| <i>A. taylori</i>   | -40663.06          | 1944  | <0.01% | -39818                  | 254 | <0.01% | -39804.58               | -227 | <0.01% | -39697.64            | 13.5 | <0.01% | -39690.9        | 0   | 100%   |
| <i>A. mexicanum</i> | -41517.4           | 1126  | <0.01% | -41048.49               | 188 | <0.01% | -41048.37               | -188 | <0.01% | -40954.28            | 0    | 100%   | -41050.65       | 193 | <0.01% |

406
